# Supplementary material for: Human disease-associated single nucleotide polymorphism changes the orientation of DROSHA on pri-mir-146a
Source: RNA. 2020 Dec;26(12):1777–86. doi: 10.1261/rna.077487.120 (PMC7668254; doi:10.1261/rna.077487.120)
Supplement: Supplemental Material [file supp_077487.120_Supplemental_Table_1.xlsx]

## Sheet: Supplemental Table 1
The underlined sequence is T7 promoter.
Substrate name	PCR template	PCR primers (5ʹ – 3ʹ)	DNA sequences encoding for RNAs (5ʹ – 3ʹ)
Pri-mir-146a_G	Genomic DNA	F-T7-pri-mir-146a	GGGAAGCCGATGTGTATCCTCAGCTTTGAGAACTGAATTCCATGGGTTGTGTCAGTGTCAGACCTGTGAAATTCAGTTCTTCAGCTGGGATATCTCTGTCATCG
		TAATACGACTCACTATAGGGAAGCCGATGTGTATCCTCAGCTTTG
		R-pri-mir-146a
		CGATGACAGAGATATCCCAGCTGAA
Pri-mir-146a_C	Genomic DNA	F-T7-pri-mir-146a	GGGAAGCCGATGTGTATCCTCAGCTTTGAGAACTGAATTCCATGGGTTGTGTCAGTGTCAGACCTCTGAAATTCAGTTCTTCAGCTGGGATATCTCTGTCATCG
		TAATACGACTCACTATAGGGAAGCCGATGTGTATCCTCAGCTTTG
		R-pri-mir-146a_C
		CGATGACAGAGATATCCCAGCTGAAGAACTGAATTTCAGAGG
Short pri-mir-146a_G	F-T7-short-146a	F-T7-short-146a	GGAGAACTGAATTCCATGGGTTGTGTCAGTGTCAGACCTGTGAAATTCAGTTCTTCAG
	and R-short-146a_G	TAATACGACTCACTATAGGAGAACTGAATTCCATGGGTTGTGTCAGTG
		R-short-146a_G
		CTGAAGAACTGAATTTCACAGGTCTGACACTGACACAACCCATGG
Short pri-mir-146a_C	F-T7-short-146a	F-T7-short-146a	GGAGAACTGAATTCCATGGGTTGTGTCAGTGTCAGACCTCTGAAATTCAGTTCTTCAG
	and R-short-146a_G	TAATACGACTCACTATAGGAGAACTGAATTCCATGGGTTGTGTCAGTG
		R-short-146a_C
		CTGAAGAACTGAATTTCAGAGGTCTGACACTGACACAACCCATGG
Pri-mir-146a_G-mGHG	Pri-mir-146a_G	F-T7-pri-mir-146a	GGGAAGCCGATGTGTATCCTCAGCTTTGAGAACTGAATTCCATGGGTTGTGTCAGTGTCAGACCTGTGAAATTCAGTTCTTCAGCTGCGGATATCTCTGTCATCG
		TAATACGACTCACTATAGGGAAGCCGATGTGTATCCTCAGCTTTG
		R-pri-mir-146a_mGHG
		CGATGACAGAGATATCCGCAGCTGAAGAACTGAATTTC
Pri-mir-146a_C-mGHG	Pri-mir-146a_C	F-T7-pri-mir-146a	GGGAAGCCGATGTGTATCCTCAGCTTTGAGAACTGAATTCCATGGGTTGTGTCAGTGTCAGACCTCTGAAATTCAGTTCTTCAGCTGCGGATATCTCTGTCATCG
		TAATACGACTCACTATAGGGAAGCCGATGTGTATCCTCAGCTTTG
		R-pri-mir-146a_mGHG
		CGATGACAGAGATATCCGCAGCTGAAGAACTGAATTTC
