# Supplementary material for: Human disease-associated single nucleotide polymorphism changes the orientation of DROSHA on pri-mir-146a
Source: RNA. 2020 Dec;26(12):1777–86. doi: 10.1261/rna.077487.120 (PMC7668254; doi:10.1261/rna.077487.120)
Supplement: Supplemental Material [file supp_077487.120_Supplemental_Table_2.xlsx]

## Sheet: Supplemental Table 2
Target	RT primers (5ʹ – 3ʹ)	qPCR primers (5ʹ – 3ʹ)
Pri-mir-146a_G	R-NotI-pri-146a	F-BamHI-pri-146a
	TCTGCAGCGGCCGCCGATGACAGAGATATCC	CGCGGATCCGGGAAGCCGATGTGTATCCTCAG
		R-NotI-pri-146a
		TCTGCAGCGGCCGCCGATGACAGAGATATCC
Pri-mir-146a_C	R-NotI-pri-146a	F-BamHI-pri-146a
	TCTGCAGCGGCCGCCGATGACAGAGATATCC	CGCGGATCCGGGAAGCCGATGTGTATCCTCAG
		R-NotI-pri-146a
		TCTGCAGCGGCCGCCGATGACAGAGATATCC
Pri-mir-146a_G-mGHG	R-NotI-pri-146a	F-BamHI-pri-146a
	TCTGCAGCGGCCGCCGATGACAGAGATATCC	CGCGGATCCGGGAAGCCGATGTGTATCCTCAG
		R-NotI-pri-146a
		TCTGCAGCGGCCGCCGATGACAGAGATATCC
Pri-mir-146a_C-mGHG	R-NotI-pri-146a	F-BamHI-pri-146a
	TCTGCAGCGGCCGCCGATGACAGAGATATCC	CGCGGATCCGGGAAGCCGATGTGTATCCTCAG
		R-NotI-pri-146a
		TCTGCAGCGGCCGCCGATGACAGAGATATCC
Pri-mir-1226	R-pri-mir-1226	F-pri-mir-1226
	CTAGGGAACACAGGGCTGGT	GTGAGGGCATGCAGGCCTGGA
		R-pri-mir-1226
		CTAGGGAACACAGGGCTGGT
GAPDH	R-GAPDH	F-GAPDH
	CCAGGGGTCTTACTCCTTGGAG	ACCCACTCCTCCACCTTTGAC
		R-GAPDH
		CCAGGGGTCTTACTCCTTGGAG
miR-146a	miR-146a-RT	miR-146a-5p-FW
	GTCGTATCCAGTGCAGGGTCCGAGGTATTCGCACTGGATACGACAACCCA	GCTGAGAACTGAATTCCAT
		AllmirRV
		GTGCAGGGTCCGAGGT
miR-1226	miR-1226-RT	miR-1226-3p-FW
	GTCGTATCCAGTGCAGGGTCCGAGGTATTCGCACTGGATACGACCTAGGG	GCTCACCAGCCCTGTGTTC
		AllmirRV
		GTGCAGGGTCCGAGGT
U6	U6-RT	U6 FW
	AAAATATGGAACGCTTCACGAATTTG	CTCGCTTCGGCAGCACATATAC
		U6 RW
		ACGCTTCACGAATTTGCGTGTC
