# Supplementary material for: Human disease-associated single nucleotide polymorphism changes the orientation of DROSHA on pri-mir-146a
Source: RNA. 2020 Dec;26(12):1777–86. doi: 10.1261/rna.077487.120 (PMC7668254; doi:10.1261/rna.077487.120)
Supplement: Supplemental Material [file supp_077487.120_Supplemental_Table_3.xlsx]

## Sheet: Supplemental Table 3
Sample	Read sequence	Raw count	Read per million
Pri-mir-146a_G F2	GGGAAGCCGATGTGTATCCTCAGCTTTGAGAACTGAATTCCATGGGTTGT	1	47.4473
	GGGGAAGCCGATGTGTATCCTCAGCTTTGAGAACTGAATTCCATGGGTTGT	1	47.4473
	GGGAAGCCGATGTGTATCCTCAGCTTTGAGAACTGAATTCCATGGGTTGTGT	1	47.4473
	GGGAAGCCGATGTGTATCCTCAGCTTTGAGAACTGAATTCCATGGGTTGTGT	5	237.237
	GGGGAAGCCGATGTGTATCCTCAGCTTTGAGAACTGAATTCCATGGGTTGTGT	1	47.4473
	GGGAAGCCGATGTGTATCCTCAGCTTTGAGAACTGAATTCCATGGGTTGTGTC	19	901.499
	GGGGAAGCCGATGTGTATCCTCAGCTTTGAGAACTGAATTCCATGGGTTGTGTC	1	47.4473
	GGGGAAGCCGATGTGTATCCTCAGCTTTGAGAACTGAATTCCATGGGTTGTGTC	3	142.342
	GGGAAGCCGATGTGTATCCTCAGCTTTGAGAACTGAATTCCATGGGTTGTGTCA	4	189.789
	GGGAAGCCGATGTGTATCCTCAGCTTTGAGAACTGAATTCCATGGGTTGTGTCAG	3	142.342
	GGGGAAGCCGATGTGTATCCTCAGCTTTGAGAACTGAATTCCATGGGTTGTGTCAG	1	47.4473
	GGGAAGCCGATGTGTATCCTCAGCTTTGAGAACTGAATTCCATGGGTTGTGTCAGT	139	6595.18
	GGGGAAGCCGATGTGTATCCTCAGCTTTGAGAACTGAATTCCATGGGTTGTGTCAGT	36	1708.1
	GGGAAGCCGATGTGTATCCTCAGCTTTGAGAACTGAATTCCATGGGTTGTGTCAGTG	42	1992.79
	GGGGAAGCCGATGTGTATCCTCAGCTTTGAGAACTGAATTCCATGGGTTGTGTCAGTG	10	474.473
	GGGAAGCCGATGTGTATCCTCAGCTTTGAGAACTGAATTCCATGGGTTGTGTCAGTGT	53	2514.71
	GGGGAAGCCGATGTGTATCCTCAGCTTTGAGAACTGAATTCCATGGGTTGTGTCAGTGT	13	616.815
	GGGAAGCCGATGTGTATCCTCAGCTTTGAGAACTGAATTCCATGGGTTGTGTCAGTGTC	237	11245
	GGGGAAGCCGATGTGTATCCTCAGCTTTGAGAACTGAATTCCATGGGTTGTGTCAGTGTC	58	2751.95
	GGGAAGCCGATGTGTATCCTCAGCTTTGAGAACTGAATTCCATGGGTTGTGTCAGTGTCA	21	996.394
	GGGGAAGCCGATGTGTATCCTCAGCTTTGAGAACTGAATTCCATGGGTTGTGTCAGTGTCA	4	189.789
	GGGAAGCCGATGTGTATCCTCAGCTTTGAGAACTGAATTCCATGGGTTGTGTCAGTGTCAG	31	1470.87
	GGGGAAGCCGATGTGTATCCTCAGCTTTGAGAACTGAATTCCATGGGTTGTGTCAGTGTCAG	10	474.473
	GGGAAGCCGATGTGTATCCTCAGCTTTGAGAACTGAATTCCATGGGTTGTGTCAGTGTCAGA	96	4554.94
	GGGGAAGCCGATGTGTATCCTCAGCTTTGAGAACTGAATTCCATGGGTTGTGTCAGTGTCAGACC	23	1091.29
	GGGAAGCCGATGTGTATCCTCAGCTTTGAGAACTGAATTCCATGGGTTGTGTCAGTGTCAGACCT	6	284.684
	GGGGAAGCCGATGTGTATCCTCAGCTTTGAGAACTGAATTCCATGGGTTGTGTCAGTGTCAGACCT	4	189.789
	GGGAAGCCGATGTGTATCCTCAGCTTTGAGAACTGAATTCCATGGGTTGTGTCAGTGTCAGACCTG	4	189.789
	GGGGAAGCCGATGTGTATCCTCAGCTTTGAGAACTGAATTCCATGGGTTGTGTCAGTGTCAGACCTG	3	142.342
	GGGAAGCCGATGTGTATCCTCAGCTTTGAGAACTGAATTCCATGGGTTGTGTCAGTGTCAGACCTGT	1	47.4473
	GGGAAGCCGATGTGTATCCTCAGCTTTGAGAACTGAATTCCATGGGTTGTGTCAGTGTCAGACCTGTG	1	47.4473
	GGGAAGCCGATGTGTATCCTCAGCTTTGAGAACTGAATTCCATGGGTTGTGTCAGTGTCAGACCTGTGAAAT	1	47.4473
	TGTGTATCCTCAGCTTTGAGAACTGAATTCCATGGGTTGTGTCAGTGTCAGAC	1	47.4473
	TGTGTATCCTCAGCTTTGAGAACTGAATTCCATGGGTTGTGTCAGTGTCAGACC	5	237.237
	TGTGTATCCTCAGCTTTGAGAACTGAATTCCATGGGTTGTGTCAGTGTCAGACCT	1	47.4473
	TGTGTATCCTCAGCTTTGAGAACTGAATTCCATGGGTTGTGTCAGTGTCAGACCTG	4	189.789
	TGTGTATCCTCAGCTTTGAGAACTGAATTCCATGGGTTGTGTCAGTGTCAGACCTGT	6	284.684
	TGTGTATCCTCAGCTTTGAGAACTGAATTCCATGGGTTGTGTCAGTGTCAGACCTGTG	29	1375.97
	TGTGTATCCTCAGCTTTGAGAACTGAATTCCATGGGTTGTGTCAGTGTCAGACCTGTGA	23	1091.29
	TGTGTATCCTCAGCTTTGAGAACTGAATTCCATGGGTTGTGTCAGTGTCAGACCTGTGAA	6	284.684
	TGTGTATCCTCAGCTTTGAGAACTGAATTCCATGGGTTGTGTCAGTGTCAGACCTGTGAAA	8	379.579
	TGTGTATCCTCAGCTTTGAGAACTGAATTCCATGGGTTGTGTCAGTGTCAGACCTGTGAAAT	7	332.131
	GTGTATCCTCAGCTTTGAGAACTGAATTCCATGGGTTGTGTCAGTGTCAGACC	1	47.4473
	GTGTATCCTCAGCTTTGAGAACTGAATTCCATGGGTTGTGTCAGTGTCAGACCTG	1	47.4473
	GTGTATCCTCAGCTTTGAGAACTGAATTCCATGGGTTGTGTCAGTGTCAGACCTGT	4	189.789
	GTGTATCCTCAGCTTTGAGAACTGAATTCCATGGGTTGTGTCAGTGTCAGACCTGTG	6	284.684
	GTGTATCCTCAGCTTTGAGAACTGAATTCCATGGGTTGTGTCAGTGTCAGACCTGTGA	6	284.684
	GTGTATCCTCAGCTTTGAGAACTGAATTCCATGGGTTGTGTCAGTGTCAGACCTGTGAA	1	47.4473
	GTGTATCCTCAGCTTTGAGAACTGAATTCCATGGGTTGTGTCAGTGTCAGACCTGTGAAA	2	94.8947
	GTGTATCCTCAGCTTTGAGAACTGAATTCCATGGGTTGTGTCAGTGTCAGACCTGTGAAAT	4	189.789
	GTGTATCCTCAGCTTTGAGAACTGAATTCCATGGGTTGTGTCAGTGTCAGACCTGTGAAATT	2	94.8947
	TGTATCCTCAGCTTTGAGAACTGAATTCCATGGGTTGTGTCAGTGTCAGACC	1	47.4473
	TGTATCCTCAGCTTTGAGAACTGAATTCCATGGGTTGTGTCAGTGTCAGACCTGT	1	47.4473
	TGTATCCTCAGCTTTGAGAACTGAATTCCATGGGTTGTGTCAGTGTCAGACCTGTG	2	94.8947
	TGTATCCTCAGCTTTGAGAACTGAATTCCATGGGTTGTGTCAGTGTCAGACCTGTGA	3	142.342
	TGTATCCTCAGCTTTGAGAACTGAATTCCATGGGTTGTGTCAGTGTCAGACCTGTGAAATT	3	142.342
	TGTATCCTCAGCTTTGAGAACTGAATTCCATGGGTTGTGTCAGTGTCAGACCTGTGAAATTC	4	189.789
	TGTATCCTCAGCTTTGAGAACTGAATTCCATGGGTTGTGTCAGTGTCAGACCTGTGAAATTCAGT	1	47.4473
	GTATCCTCAGCTTTGAGAACTGAATTCCATGGGTTGTGTCAGTGTCAGACCTGTG	4	189.789
	GTATCCTCAGCTTTGAGAACTGAATTCCATGGGTTGTGTCAGTGTCAGACCTGTGA	6	284.684
	GTATCCTCAGCTTTGAGAACTGAATTCCATGGGTTGTGTCAGTGTCAGACCTGTGAA	1	47.4473
	GTATCCTCAGCTTTGAGAACTGAATTCCATGGGTTGTGTCAGTGTCAGACCTGTGAAA	2	94.8947
	GTATCCTCAGCTTTGAGAACTGAATTCCATGGGTTGTGTCAGTGTCAGACCTGTGAAAT	5	237.237
	GTATCCTCAGCTTTGAGAACTGAATTCCATGGGTTGTGTCAGTGTCAGACCTGTGAAATT	3	142.342
	GTATCCTCAGCTTTGAGAACTGAATTCCATGGGTTGTGTCAGTGTCAGACCTGTGAAATTC	10	474.473
	GTATCCTCAGCTTTGAGAACTGAATTCCATGGGTTGTGTCAGTGTCAGACCTGTGAAATTCAGTT	2	94.8947
	TATCCTCAGCTTTGAGAACTGAATTCCATGGGTTGTGTCAGTGTCAGACCTGTG	1	47.4473
	TATCCTCAGCTTTGAGAACTGAATTCCATGGGTTGTGTCAGTGTCAGACCTGTGA	1	47.4473
	TATCCTCAGCTTTGAGAACTGAATTCCATGGGTTGTGTCAGTGTCAGACCTGTGAAA	3	142.342
	TATCCTCAGCTTTGAGAACTGAATTCCATGGGTTGTGTCAGTGTCAGACCTGTGAAAT	2	94.8947
	TATCCTCAGCTTTGAGAACTGAATTCCATGGGTTGTGTCAGTGTCAGACCTGTGAAATT	5	237.237
	TATCCTCAGCTTTGAGAACTGAATTCCATGGGTTGTGTCAGTGTCAGACCTGTGAAATTC	9	427.026
	TATCCTCAGCTTTGAGAACTGAATTCCATGGGTTGTGTCAGTGTCAGACCTGTGAAATTCA	3	142.342
	TATCCTCAGCTTTGAGAACTGAATTCCATGGGTTGTGTCAGTGTCAGACCTGTGAAATTCAG	2	94.8947
	TATCCTCAGCTTTGAGAACTGAATTCCATGGGTTGTGTCAGTGTCAGACCTGTGAAATTCAGTTCT	1	47.4473
	TATCCTCAGCTTTGAGAACTGAATTCCATGGGTTGTGTCAGTGTCAGACCTGTGAAATTCAGTTCTTC	1	47.4473
	TATCCTCAGCTTTGAGAACTGAATTCCATGGGTTGTGTCAGTGTCAGACCTGTGAAATTCAGTTCTTCAGCTGGG	1	47.4473
	GGAAGCCGATGTGTATCCTCAGCTTTGAGAACTGAATTCCATGGGTTGTGT	1	47.4473
	GGAAGCCGATGTGTATCCTCAGCTTTGAGAACTGAATTCCATGGGTTGTGTC	1	47.4473
	ATCCTCAGCTTTGAGAACTGAATTCCATGGGTTGTGTCAGTGTCAGACCTGT	1	47.4473
	GGAAGCCGATGTGTATCCTCAGCTTTGAGAACTGAATTCCATGGGTTGTGTCAGT	8	379.579
	ATCCTCAGCTTTGAGAACTGAATTCCATGGGTTGTGTCAGTGTCAGACCTGTGAAA	2	94.8947
	ATCCTCAGCTTTGAGAACTGAATTCCATGGGTTGTGTCAGTGTCAGACCTGTGAAAT	15	711.71
	ATCCTCAGCTTTGAGAACTGAATTCCATGGGTTGTGTCAGTGTCAGACCTGTGAAATT	18	854.052
	ATCCTCAGCTTTGAGAACTGAATTCCATGGGTTGTGTCAGTGTCAGACCTGTGAAATTC	60	2846.84
	ATCCTCAGCTTTGAGAACTGAATTCCATGGGTTGTGTCAGTGTCAGACCTGTGAAATTCA	18	854.052
	ATCCTCAGCTTTGAGAACTGAATTCCATGGGTTGTGTCAGTGTCAGACCTGTGAAATTCAG	11	521.921
	ATCCTCAGCTTTGAGAACTGAATTCCATGGGTTGTGTCAGTGTCAGACCTGTGAAATTCAGT	11	521.921
	GGAAGCCGATGTGTATCCTCAGCTTTGAGAACTGAATTCCATGGGTTGTGTCAGTG	4	189.789
	ATCCTCAGCTTTGAGAACTGAATTCCATGGGTTGTGTCAGTGTCAGACCTGTGAAATTCAGTTCT	22	1043.84
	ATCCTCAGCTTTGAGAACTGAATTCCATGGGTTGTGTCAGTGTCAGACCTGTGAAATTCAGTTCTT	3	142.342
	ATCCTCAGCTTTGAGAACTGAATTCCATGGGTTGTGTCAGTGTCAGACCTGTGAAATTCAGTTCTTC	12	569.368
	ATCCTCAGCTTTGAGAACTGAATTCCATGGGTTGTGTCAGTGTCAGACCTGTGAAATTCAGTTCTTCA	2	94.8947
	ATCCTCAGCTTTGAGAACTGAATTCCATGGGTTGTGTCAGTGTCAGACCTGTGAAATTCAGTTCTTCAG	2	94.8947
	ATCCTCAGCTTTGAGAACTGAATTCCATGGGTTGTGTCAGTGTCAGACCTGTGAAATTCAGTTCTTCAGC	1	47.4473
	ATCCTCAGCTTTGAGAACTGAATTCCATGGGTTGTGTCAGTGTCAGACCTGTGAAATTCAGTTCTTCAGCTGGG	1	47.4473
	GGAAGCCGATGTGTATCCTCAGCTTTGAGAACTGAATTCCATGGGTTGTGTCAGTGT	4	189.789
	GGAAGCCGATGTGTATCCTCAGCTTTGAGAACTGAATTCCATGGGTTGTGTCAGTGTC	20	948.947
	GGAAGCCGATGTGTATCCTCAGCTTTGAGAACTGAATTCCATGGGTTGTGTCAGTGTCA	6	284.684
	GGAAGCCGATGTGTATCCTCAGCTTTGAGAACTGAATTCCATGGGTTGTGTCAGTGTCAG	5	237.237
	GGAAGCCGATGTGTATCCTCAGCTTTGAGAACTGAATTCCATGGGTTGTGTCAGTGTCAGA	2	94.8947
	GGAAGCCGATGTGTATCCTCAGCTTTGAGAACTGAATTCCATGGGTTGTGTCAGTGTCAGAC	6	284.684
	TCCTCAGCTTTGAGAACTGAATTCCATGGGTTGTGTCAGTGTCAGACCTGT	1	47.4473
	TCCTCAGCTTTGAGAACTGAATTCCATGGGTTGTGTCAGTGTCAGACCTGTG	1	47.4473
	GGAAGCCGATGTGTATCCTCAGCTTTGAGAACTGAATTCCATGGGTTGTGTCAGTGTCAGACCTG	1	47.4473
	TCCTCAGCTTTGAGAACTGAATTCCATGGGTTGTGTCAGTGTCAGACCTGTGAAA	1	47.4473
	TCCTCAGCTTTGAGAACTGAATTCCATGGGTTGTGTCAGTGTCAGACCTGTGAAAT	1	47.4473
	TCCTCAGCTTTGAGAACTGAATTCCATGGGTTGTGTCAGTGTCAGACCTGTGAAATT	8	379.579
	TCCTCAGCTTTGAGAACTGAATTCCATGGGTTGTGTCAGTGTCAGACCTGTGAAATTC	9	427.026
	TCCTCAGCTTTGAGAACTGAATTCCATGGGTTGTGTCAGTGTCAGACCTGTGAAATTCA	3	142.342
	TCCTCAGCTTTGAGAACTGAATTCCATGGGTTGTGTCAGTGTCAGACCTGTGAAATTCAGTTCTTC	6	284.684
	GGAAGCCGATGTGTATCCTCAGCTTTGAGAACTGAATTCCATGGGTTGTGTCAGTGTCAGACCTGTG	1	47.4473
	TCCTCAGCTTTGAGAACTGAATTCCATGGGTTGTGTCAGTGTCAGACCTGTGAAATTCAGTTCTTCAGCTGGGAT	1	47.4473
	CCTCAGCTTTGAGAACTGAATTCCATGGGTTGTGTCAGTGTCAGACCTGTGAAATT	2	94.8947
	CCTCAGCTTTGAGAACTGAATTCCATGGGTTGTGTCAGTGTCAGACCTGTGAAATTC	1	47.4473
	CCTCAGCTTTGAGAACTGAATTCCATGGGTTGTGTCAGTGTCAGACCTGTGAAATTCA	3	142.342
	CCTCAGCTTTGAGAACTGAATTCCATGGGTTGTGTCAGTGTCAGACCTGTGAAATTCAGT	2	94.8947
	CCTCAGCTTTGAGAACTGAATTCCATGGGTTGTGTCAGTGTCAGACCTGTGAAATTCAGTTC	1	47.4473
	CCTCAGCTTTGAGAACTGAATTCCATGGGTTGTGTCAGTGTCAGACCTGTGAAATTCAGTTCTTC	4	189.789
	CCTCAGCTTTGAGAACTGAATTCCATGGGTTGTGTCAGTGTCAGACCTGTGAAATTCAGTTCTTCAG	1	47.4473
	CTCAGCTTTGAGAACTGAATTCCATGGGTTGTGTCAGTGTCAGACCTGTGA	1	47.4473
	CTCAGCTTTGAGAACTGAATTCCATGGGTTGTGTCAGTGTCAGACCTGTGAAAT	1	47.4473
	CTCAGCTTTGAGAACTGAATTCCATGGGTTGTGTCAGTGTCAGACCTGTGAAATTCA	1	47.4473
	CTCAGCTTTGAGAACTGAATTCCATGGGTTGTGTCAGTGTCAGACCTGTGAAATTCAGTTC	1	47.4473
	CTCAGCTTTGAGAACTGAATTCCATGGGTTGTGTCAGTGTCAGACCTGTGAAATTCAGTTCT	1	47.4473
	CTCAGCTTTGAGAACTGAATTCCATGGGTTGTGTCAGTGTCAGACCTGTGAAATTCAGTTCTTCA	1	47.4473
	CTCAGCTTTGAGAACTGAATTCCATGGGTTGTGTCAGTGTCAGACCTGTGAAATTCAGTTCTTCAGC	2	94.8947
	TCAGCTTTGAGAACTGAATTCCATGGGTTGTGTCAGTGTCAGACCTGTGAAATTC	1	47.4473
	TCAGCTTTGAGAACTGAATTCCATGGGTTGTGTCAGTGTCAGACCTGTGAAATTCA	1	47.4473
	TCAGCTTTGAGAACTGAATTCCATGGGTTGTGTCAGTGTCAGACCTGTGAAATTCAG	2	94.8947
	TCAGCTTTGAGAACTGAATTCCATGGGTTGTGTCAGTGTCAGACCTGTGAAATTCAGT	6	284.684
	TCAGCTTTGAGAACTGAATTCCATGGGTTGTGTCAGTGTCAGACCTGTGAAATTCAGTT	2	94.8947
	TCAGCTTTGAGAACTGAATTCCATGGGTTGTGTCAGTGTCAGACCTGTGAAATTCAGTTCT	9	427.026
	TCAGCTTTGAGAACTGAATTCCATGGGTTGTGTCAGTGTCAGACCTGTGAAATTCAGTTCTT	2	94.8947
	TCAGCTTTGAGAACTGAATTCCATGGGTTGTGTCAGTGTCAGACCTGTGAAATTCAGTTCTTCAG	6	284.684
	TCAGCTTTGAGAACTGAATTCCATGGGTTGTGTCAGTGTCAGACCTGTGAAATTCAGTTCTTCAGC	6	284.684
	CAGCTTTGAGAACTGAATTCCATGGGTTGTGTCAGTGTCAGACCTGTGAAATT	1	47.4473
	CAGCTTTGAGAACTGAATTCCATGGGTTGTGTCAGTGTCAGACCTGTGAAATTC	1	47.4473
	CAGCTTTGAGAACTGAATTCCATGGGTTGTGTCAGTGTCAGACCTGTGAAATTCAG	1	47.4473
	CAGCTTTGAGAACTGAATTCCATGGGTTGTGTCAGTGTCAGACCTGTGAAATTCAGT	1	47.4473
	CAGCTTTGAGAACTGAATTCCATGGGTTGTGTCAGTGTCAGACCTGTGAAATTCAGTTC	2	94.8947
	CAGCTTTGAGAACTGAATTCCATGGGTTGTGTCAGTGTCAGACCTGTGAAATTCAGTTCT	8	379.579
	CAGCTTTGAGAACTGAATTCCATGGGTTGTGTCAGTGTCAGACCTGTGAAATTCAGTTCTT	2	94.8947
	CAGCTTTGAGAACTGAATTCCATGGGTTGTGTCAGTGTCAGACCTGTGAAATTCAGTTCTTC	22	1043.84
	CAGCTTTGAGAACTGAATTCCATGGGTTGTGTCAGTGTCAGACCTGTGAAATTCAGTTCTTCAGC	28	1328.53
	AGCTTTGAGAACTGAATTCCATGGGTTGTGTCAGTGTCAGACCTGTGAAATTCAG	1	47.4473
	AGCTTTGAGAACTGAATTCCATGGGTTGTGTCAGTGTCAGACCTGTGAAATTCAGT	3	142.342
	AGCTTTGAGAACTGAATTCCATGGGTTGTGTCAGTGTCAGACCTGTGAAATTCAGTT	2	94.8947
	AGCTTTGAGAACTGAATTCCATGGGTTGTGTCAGTGTCAGACCTGTGAAATTCAGTTC	6	284.684
	AGCTTTGAGAACTGAATTCCATGGGTTGTGTCAGTGTCAGACCTGTGAAATTCAGTTCT	27	1281.08
	AGCTTTGAGAACTGAATTCCATGGGTTGTGTCAGTGTCAGACCTGTGAAATTCAGTTCTT	19	901.499
	AGCTTTGAGAACTGAATTCCATGGGTTGTGTCAGTGTCAGACCTGTGAAATTCAGTTCTTC	358	16986.1
	AGCTTTGAGAACTGAATTCCATGGGTTGTGTCAGTGTCAGACCTGTGAAATTCAGTTCTTCA	308	14613.8
	AGCTTTGAGAACTGAATTCCATGGGTTGTGTCAGTGTCAGACCTGTGAAATTCAGTTCTTCAGC	4	189.789
	AGCTTTGAGAACTGAATTCCATGGGTTGTGTCAGTGTCAGACCTGTGAAATTCAGTTCTTCAGCT	5	237.237
	AGCTTTGAGAACTGAATTCCATGGGTTGTGTCAGTGTCAGACCTGTGAAATTCAGTTCTTCAGCTG	4	189.789
	AGCTTTGAGAACTGAATTCCATGGGTTGTGTCAGTGTCAGACCTGTGAAATTCAGTTCTTCAGCTGG	2	94.8947
	AGCTTTGAGAACTGAATTCCATGGGTTGTGTCAGTGTCAGACCTGTGAAATTCAGTTCTTCAGCTGGG	1	47.4473
	GCTTTGAGAACTGAATTCCATGGGTTGTGTCAGTGTCAGACCTGTGAAATTC	1	47.4473
	GCTTTGAGAACTGAATTCCATGGGTTGTGTCAGTGTCAGACCTGTGAAATTCAGT	3	142.342
	GCTTTGAGAACTGAATTCCATGGGTTGTGTCAGTGTCAGACCTGTGAAATTCAGTT	10	474.473
	GCTTTGAGAACTGAATTCCATGGGTTGTGTCAGTGTCAGACCTGTGAAATTCAGTTC	18	854.052
	GCTTTGAGAACTGAATTCCATGGGTTGTGTCAGTGTCAGACCTGTGAAATTCAGTTCT	79	3748.34
	GCTTTGAGAACTGAATTCCATGGGTTGTGTCAGTGTCAGACCTGTGAAATTCAGTTCTT	27	1281.08
	GCTTTGAGAACTGAATTCCATGGGTTGTGTCAGTGTCAGACCTGTGAAATTCAGTTCTTC	722	34257
	GCTTTGAGAACTGAATTCCATGGGTTGTGTCAGTGTCAGACCTGTGAAATTCAGTTCTTCA	721	34209.5
	GCTTTGAGAACTGAATTCCATGGGTTGTGTCAGTGTCAGACCTGTGAAATTCAGTTCTTCAG	1197	56794.5
	GCTTTGAGAACTGAATTCCATGGGTTGTGTCAGTGTCAGACCTGTGAAATTCAGTTCTTCAGCTG	76	3606
	GCTTTGAGAACTGAATTCCATGGGTTGTGTCAGTGTCAGACCTGTGAAATTCAGTTCTTCAGCTGG	3	142.342
	GCTTTGAGAACTGAATTCCATGGGTTGTGTCAGTGTCAGACCTGTGAAATTCAGTTCTTCAGCTGGG	2	94.8947
	GCTTTGAGAACTGAATTCCATGGGTTGTGTCAGTGTCAGACCTGTGAAATTCAGTTCTTCAGCTGGGA	1	47.4473
	GCTTTGAGAACTGAATTCCATGGGTTGTGTCAGTGTCAGACCTGTGAAATTCAGTTCTTCAGCTGGGATATCT	1	47.4473
	CTTTGAGAACTGAATTCCATGGGTTGTGTCAGTGTCAGACCTGTGAAATTCAGTT	1	47.4473
	CTTTGAGAACTGAATTCCATGGGTTGTGTCAGTGTCAGACCTGTGAAATTCAGTTCT	3	142.342
	CTTTGAGAACTGAATTCCATGGGTTGTGTCAGTGTCAGACCTGTGAAATTCAGTTCTT	3	142.342
	CTTTGAGAACTGAATTCCATGGGTTGTGTCAGTGTCAGACCTGTGAAATTCAGTTCTTC	41	1945.34
	CTTTGAGAACTGAATTCCATGGGTTGTGTCAGTGTCAGACCTGTGAAATTCAGTTCTTCA	52	2467.26
	CTTTGAGAACTGAATTCCATGGGTTGTGTCAGTGTCAGACCTGTGAAATTCAGTTCTTCAG	42	1992.79
	CTTTGAGAACTGAATTCCATGGGTTGTGTCAGTGTCAGACCTGTGAAATTCAGTTCTTCAGC	121	5741.13
	CTTTGAGAACTGAATTCCATGGGTTGTGTCAGTGTCAGACCTGTGAAATTCAGTTCTTCAGCTGG	4	189.789
	CTTTGAGAACTGAATTCCATGGGTTGTGTCAGTGTCAGACCTGTGAAATTCAGTTCTTCAGCTGGG	4	189.789
	CTTTGAGAACTGAATTCCATGGGTTGTGTCAGTGTCAGACCTGTGAAATTCAGTTCTTCAGCTGGGA	1	47.4473
	TTTGAGAACTGAATTCCATGGGTTGTGTCAGTGTCAGACCTGTGAAATTCAGTTCTTCAGCTGGGATATCTCTGTC	1	47.4473
	TTTGAGAACTGAATTCCATGGGTTGTGTCAGTGTCAGACCTGTGAAATTCAGTTCT	4	189.789
	TTTGAGAACTGAATTCCATGGGTTGTGTCAGTGTCAGACCTGTGAAATTCAGTTCTT	9	427.026
	TTTGAGAACTGAATTCCATGGGTTGTGTCAGTGTCAGACCTGTGAAATTCAGTTCTTC	130	6168.15
	TTTGAGAACTGAATTCCATGGGTTGTGTCAGTGTCAGACCTGTGAAATTCAGTTCTTCA	111	5266.65
	TTTGAGAACTGAATTCCATGGGTTGTGTCAGTGTCAGACCTGTGAAATTCAGTTCTTCAG	122	5788.57
	TTTGAGAACTGAATTCCATGGGTTGTGTCAGTGTCAGACCTGTGAAATTCAGTTCTTCAGC	963	45691.8
	TTTGAGAACTGAATTCCATGGGTTGTGTCAGTGTCAGACCTGTGAAATTCAGTTCTTCAGCT	7	332.131
	TTTGAGAACTGAATTCCATGGGTTGTGTCAGTGTCAGACCTGTGAAATTCAGTTCTTCAGCTGGG	48	2277.47
	TTTGAGAACTGAATTCCATGGGTTGTGTCAGTGTCAGACCTGTGAAATTCAGTTCTTCAGCTGGGA	14	664.263
	GAAGCCGATGTGTATCCTCAGCTTTGAGAACTGAATTCCATGGGTTGTGTCA	1	47.4473
	GAAGCCGATGTGTATCCTCAGCTTTGAGAACTGAATTCCATGGGTTGTGTCAGT	2	94.8947
	TTGAGAACTGAATTCCATGGGTTGTGTCAGTGTCAGACCTGTGAAATTCAGTTCT	2	94.8947
	TTGAGAACTGAATTCCATGGGTTGTGTCAGTGTCAGACCTGTGAAATTCAGTTCTT	23	1091.29
	TTGAGAACTGAATTCCATGGGTTGTGTCAGTGTCAGACCTGTGAAATTCAGTTCTTC	209	9916.49
	TTGAGAACTGAATTCCATGGGTTGTGTCAGTGTCAGACCTGTGAAATTCAGTTCTTCA	1842	87398
	TTGAGAACTGAATTCCATGGGTTGTGTCAGTGTCAGACCTGTGAAATTCAGTTCTTCAG	4757	225707
	TTGAGAACTGAATTCCATGGGTTGTGTCAGTGTCAGACCTGTGAAATTCAGTTCTTCAGC	707	33545.3
	TTGAGAACTGAATTCCATGGGTTGTGTCAGTGTCAGACCTGTGAAATTCAGTTCTTCAGCT	13	616.815
	TTGAGAACTGAATTCCATGGGTTGTGTCAGTGTCAGACCTGTGAAATTCAGTTCTTCAGCTG	18	854.052
	TTGAGAACTGAATTCCATGGGTTGTGTCAGTGTCAGACCTGTGAAATTCAGTTCTTCAGCTGGGA	52	2467.26
	TTGAGAACTGAATTCCATGGGTTGTGTCAGTGTCAGACCTGTGAAATTCAGTTCTTCAGCTGGGAT	8	379.579
	TTGAGAACTGAATTCCATGGGTTGTGTCAGTGTCAGACCTGTGAAATTCAGTTCTTCAGCTGGGATA	5	237.237
	GAAGCCGATGTGTATCCTCAGCTTTGAGAACTGAATTCCATGGGTTGTGTCAGTGTC	10	474.473
	TGAGAACTGAATTCCATGGGTTGTGTCAGTGTCAGACCTGTGAAATTCAGTTCTTCAGCTGGGATATCTCTGTCA	1	47.4473
	GAAGCCGATGTGTATCCTCAGCTTTGAGAACTGAATTCCATGGGTTGTGTCAGTGTCAG	3	142.342
	GAAGCCGATGTGTATCCTCAGCTTTGAGAACTGAATTCCATGGGTTGTGTCAGTGTCAGA	3	142.342
	GAAGCCGATGTGTATCCTCAGCTTTGAGAACTGAATTCCATGGGTTGTGTCAGTGTCAGAC	1	47.4473
	GAAGCCGATGTGTATCCTCAGCTTTGAGAACTGAATTCCATGGGTTGTGTCAGTGTCAGACC	4	189.789
	TGAGAACTGAATTCCATGGGTTGTGTCAGTGTCAGACCTGTGAAATTCAGTTCT	2	94.8947
	TGAGAACTGAATTCCATGGGTTGTGTCAGTGTCAGACCTGTGAAATTCAGTTCTT	12	569.368
	TGAGAACTGAATTCCATGGGTTGTGTCAGTGTCAGACCTGTGAAATTCAGTTCTTC	37	1755.55
	TGAGAACTGAATTCCATGGGTTGTGTCAGTGTCAGACCTGTGAAATTCAGTTCTTCA	168	7971.15
	TGAGAACTGAATTCCATGGGTTGTGTCAGTGTCAGACCTGTGAAATTCAGTTCTTCAG	733	34778.9
	TGAGAACTGAATTCCATGGGTTGTGTCAGTGTCAGACCTGTGAAATTCAGTTCTTCAGC	972	46118.8
	TGAGAACTGAATTCCATGGGTTGTGTCAGTGTCAGACCTGTGAAATTCAGTTCTTCAGCT	11	521.921
	TGAGAACTGAATTCCATGGGTTGTGTCAGTGTCAGACCTGTGAAATTCAGTTCTTCAGCTG	25	1186.18
	TGAGAACTGAATTCCATGGGTTGTGTCAGTGTCAGACCTGTGAAATTCAGTTCTTCAGCTGG	26	1233.63
	TGAGAACTGAATTCCATGGGTTGTGTCAGTGTCAGACCTGTGAAATTCAGTTCTTCAGCTGGGAT	19	901.499
	TGAGAACTGAATTCCATGGGTTGTGTCAGTGTCAGACCTGTGAAATTCAGTTCTTCAGCTGGGATA	18	854.052
	TGAGAACTGAATTCCATGGGTTGTGTCAGTGTCAGACCTGTGAAATTCAGTTCTTCAGCTGGGATAT	2	94.8947
	TGAGAACTGAATTCCATGGGTTGTGTCAGTGTCAGACCTGTGAAATTCAGTTCTTCAGCTGGGATATC	1	47.4473
	TGAGAACTGAATTCCATGGGTTGTGTCAGTGTCAGACCTGTGAAATTCAGTTCTTCAGCTGGGATATCTCTG	1	47.4473
	GAGAACTGAATTCCATGGGTTGTGTCAGTGTCAGACCTGTGAAATTCAGTTCTTCAGCTGGGATATCTCTGTC	1	47.4473
	GAGAACTGAATTCCATGGGTTGTGTCAGTGTCAGACCTGTGAAATTCAGTTCTTCAGCTGGGATATCTCTGTCATC	1	47.4473
	GAGAACTGAATTCCATGGGTTGTGTCAGTGTCAGACCTGTGAAATTCAGTTCTT	5	237.237
	GAGAACTGAATTCCATGGGTTGTGTCAGTGTCAGACCTGTGAAATTCAGTTCTTC	11	521.921
	GAGAACTGAATTCCATGGGTTGTGTCAGTGTCAGACCTGTGAAATTCAGTTCTTCA	17	806.605
	GAGAACTGAATTCCATGGGTTGTGTCAGTGTCAGACCTGTGAAATTCAGTTCTTCAG	38	1803
	GAGAACTGAATTCCATGGGTTGTGTCAGTGTCAGACCTGTGAAATTCAGTTCTTCAGC	149	7069.65
	GAGAACTGAATTCCATGGGTTGTGTCAGTGTCAGACCTGTGAAATTCAGTTCTTCAGCT	2	94.8947
	GAGAACTGAATTCCATGGGTTGTGTCAGTGTCAGACCTGTGAAATTCAGTTCTTCAGCTG	11	521.921
	GAGAACTGAATTCCATGGGTTGTGTCAGTGTCAGACCTGTGAAATTCAGTTCTTCAGCTGG	10	474.473
	GAGAACTGAATTCCATGGGTTGTGTCAGTGTCAGACCTGTGAAATTCAGTTCTTCAGCTGGG	61	2894.29
	GAGAACTGAATTCCATGGGTTGTGTCAGTGTCAGACCTGTGAAATTCAGTTCTTCAGCTGGGATA	7	332.131
	GAGAACTGAATTCCATGGGTTGTGTCAGTGTCAGACCTGTGAAATTCAGTTCTTCAGCTGGGATATC	1	47.4473
	GAGAACTGAATTCCATGGGTTGTGTCAGTGTCAGACCTGTGAAATTCAGTTCTTCAGCTGGGATATCTCTGT	1	47.4473
	AGAACTGAATTCCATGGGTTGTGTCAGTGTCAGACCTGTGAAATTCAGTTCTTCAGCTGGGATATCTCTGTCATCG	1	47.4473
	AGAACTGAATTCCATGGGTTGTGTCAGTGTCAGACCTGTGAAATTCAGTTCTT	2	94.8947
	AGAACTGAATTCCATGGGTTGTGTCAGTGTCAGACCTGTGAAATTCAGTTCTTC	5	237.237
	AGAACTGAATTCCATGGGTTGTGTCAGTGTCAGACCTGTGAAATTCAGTTCTTCA	14	664.263
	AGAACTGAATTCCATGGGTTGTGTCAGTGTCAGACCTGTGAAATTCAGTTCTTCAG	26	1233.63
	AGAACTGAATTCCATGGGTTGTGTCAGTGTCAGACCTGTGAAATTCAGTTCTTCAGC	29	1375.97
	AGAACTGAATTCCATGGGTTGTGTCAGTGTCAGACCTGTGAAATTCAGTTCTTCAGCTG	6	284.684
	AGAACTGAATTCCATGGGTTGTGTCAGTGTCAGACCTGTGAAATTCAGTTCTTCAGCTGG	10	474.473
	AGAACTGAATTCCATGGGTTGTGTCAGTGTCAGACCTGTGAAATTCAGTTCTTCAGCTGGG	55	2609.6
	AGAACTGAATTCCATGGGTTGTGTCAGTGTCAGACCTGTGAAATTCAGTTCTTCAGCTGGGA	31	1470.87
	AGAACTGAATTCCATGGGTTGTGTCAGTGTCAGACCTGTGAAATTCAGTTCTTCAGCTGGGATATC	1	47.4473
	AGAACTGAATTCCATGGGTTGTGTCAGTGTCAGACCTGTGAAATTCAGTTCTTCAGCTGGGATATCT	2	94.8947
	GAACTGAATTCCATGGGTTGTGTCAGTGTCAGACCTGTGAAATTCAGTTCTTC	2	94.8947
	GAACTGAATTCCATGGGTTGTGTCAGTGTCAGACCTGTGAAATTCAGTTCTTCA	8	379.579
	GAACTGAATTCCATGGGTTGTGTCAGTGTCAGACCTGTGAAATTCAGTTCTTCAG	18	854.052
	GAACTGAATTCCATGGGTTGTGTCAGTGTCAGACCTGTGAAATTCAGTTCTTCAGC	19	901.499
	GAACTGAATTCCATGGGTTGTGTCAGTGTCAGACCTGTGAAATTCAGTTCTTCAGCTG	2	94.8947
	GAACTGAATTCCATGGGTTGTGTCAGTGTCAGACCTGTGAAATTCAGTTCTTCAGCTGG	1	47.4473
	GAACTGAATTCCATGGGTTGTGTCAGTGTCAGACCTGTGAAATTCAGTTCTTCAGCTGGG	5	237.237
	GAACTGAATTCCATGGGTTGTGTCAGTGTCAGACCTGTGAAATTCAGTTCTTCAGCTGGGA	3	142.342
	AACTGAATTCCATGGGTTGTGTCAGTGTCAGACCTGTGAAATTCAGTTCTTCAGCTGGGATATCTCTGTCATC	1	47.4473
	AACTGAATTCCATGGGTTGTGTCAGTGTCAGACCTGTGAAATTCAGTTCTT	3	142.342
	AACTGAATTCCATGGGTTGTGTCAGTGTCAGACCTGTGAAATTCAGTTCTTC	2	94.8947
	AACTGAATTCCATGGGTTGTGTCAGTGTCAGACCTGTGAAATTCAGTTCTTCA	2	94.8947
	AACTGAATTCCATGGGTTGTGTCAGTGTCAGACCTGTGAAATTCAGTTCTTCAG	15	711.71
	AACTGAATTCCATGGGTTGTGTCAGTGTCAGACCTGTGAAATTCAGTTCTTCAGC	6	284.684
	AACTGAATTCCATGGGTTGTGTCAGTGTCAGACCTGTGAAATTCAGTTCTTCAGCTG	2	94.8947
	AACTGAATTCCATGGGTTGTGTCAGTGTCAGACCTGTGAAATTCAGTTCTTCAGCTGG	8	379.579
	AACTGAATTCCATGGGTTGTGTCAGTGTCAGACCTGTGAAATTCAGTTCTTCAGCTGGG	70	3321.31
	AACTGAATTCCATGGGTTGTGTCAGTGTCAGACCTGTGAAATTCAGTTCTTCAGCTGGGA	35	1660.66
	AACTGAATTCCATGGGTTGTGTCAGTGTCAGACCTGTGAAATTCAGTTCTTCAGCTGGGAT	13	616.815
	AACTGAATTCCATGGGTTGTGTCAGTGTCAGACCTGTGAAATTCAGTTCTTCAGCTGGGATA	32	1518.31
	AACTGAATTCCATGGGTTGTGTCAGTGTCAGACCTGTGAAATTCAGTTCTTCAGCTGGGATATCT	11	521.921
	AACTGAATTCCATGGGTTGTGTCAGTGTCAGACCTGTGAAATTCAGTTCTTCAGCTGGGATATCTC	3	142.342
	AACTGAATTCCATGGGTTGTGTCAGTGTCAGACCTGTGAAATTCAGTTCTTCAGCTGGGATATCTCT	2	94.8947
	ACTGAATTCCATGGGTTGTGTCAGTGTCAGACCTGTGAAATTCAGTTCTT	3	142.342
	ACTGAATTCCATGGGTTGTGTCAGTGTCAGACCTGTGAAATTCAGTTCTTCA	2	94.8947
	ACTGAATTCCATGGGTTGTGTCAGTGTCAGACCTGTGAAATTCAGTTCTTCAG	10	474.473
	ACTGAATTCCATGGGTTGTGTCAGTGTCAGACCTGTGAAATTCAGTTCTTCAGC	10	474.473
	ACTGAATTCCATGGGTTGTGTCAGTGTCAGACCTGTGAAATTCAGTTCTTCAGCTG	1	47.4473
	ACTGAATTCCATGGGTTGTGTCAGTGTCAGACCTGTGAAATTCAGTTCTTCAGCTGG	2	94.8947
	ACTGAATTCCATGGGTTGTGTCAGTGTCAGACCTGTGAAATTCAGTTCTTCAGCTGGG	17	806.605
	ACTGAATTCCATGGGTTGTGTCAGTGTCAGACCTGTGAAATTCAGTTCTTCAGCTGGGA	3	142.342
	ACTGAATTCCATGGGTTGTGTCAGTGTCAGACCTGTGAAATTCAGTTCTTCAGCTGGGAT	6	284.684
	ACTGAATTCCATGGGTTGTGTCAGTGTCAGACCTGTGAAATTCAGTTCTTCAGCTGGGATA	6	284.684
	ACTGAATTCCATGGGTTGTGTCAGTGTCAGACCTGTGAAATTCAGTTCTTCAGCTGGGATAT	1	47.4473
	ACTGAATTCCATGGGTTGTGTCAGTGTCAGACCTGTGAAATTCAGTTCTTCAGCTGGGATATCTCT	1	47.4473
	CTGAATTCCATGGGTTGTGTCAGTGTCAGACCTGTGAAATTCAGTTCTTCAGCTGGGATATCTCTGTCATCG	1	47.4473
	CTGAATTCCATGGGTTGTGTCAGTGTCAGACCTGTGAAATTCAGTTCTTC	1	47.4473
	CTGAATTCCATGGGTTGTGTCAGTGTCAGACCTGTGAAATTCAGTTCTTCA	1	47.4473
	CTGAATTCCATGGGTTGTGTCAGTGTCAGACCTGTGAAATTCAGTTCTTCAG	2	94.8947
	CTGAATTCCATGGGTTGTGTCAGTGTCAGACCTGTGAAATTCAGTTCTTCAGC	4	189.789
	CTGAATTCCATGGGTTGTGTCAGTGTCAGACCTGTGAAATTCAGTTCTTCAGCTGG	1	47.4473
	CTGAATTCCATGGGTTGTGTCAGTGTCAGACCTGTGAAATTCAGTTCTTCAGCTGGG	8	379.579
	CTGAATTCCATGGGTTGTGTCAGTGTCAGACCTGTGAAATTCAGTTCTTCAGCTGGGA	2	94.8947
	CTGAATTCCATGGGTTGTGTCAGTGTCAGACCTGTGAAATTCAGTTCTTCAGCTGGGAT	3	142.342
	CTGAATTCCATGGGTTGTGTCAGTGTCAGACCTGTGAAATTCAGTTCTTCAGCTGGGATA	4	189.789
	CTGAATTCCATGGGTTGTGTCAGTGTCAGACCTGTGAAATTCAGTTCTTCAGCTGGGATAT	2	94.8947
	CTGAATTCCATGGGTTGTGTCAGTGTCAGACCTGTGAAATTCAGTTCTTCAGCTGGGATATC	5	237.237
	CTGAATTCCATGGGTTGTGTCAGTGTCAGACCTGTGAAATTCAGTTCTTCAGCTGGGATATCTCTG	1	47.4473
	CTGAATTCCATGGGTTGTGTCAGTGTCAGACCTGTGAAATTCAGTTCTTCAGCTGGGATATCTCTGT	1	47.4473
	TGAATTCCATGGGTTGTGTCAGTGTCAGACCTGTGAAATTCAGTTCTTCAGCTGGGATATCTCTGTC	4	189.789
	TGAATTCCATGGGTTGTGTCAGTGTCAGACCTGTGAAATTCAGTTCTTCAGCTGGGATATCTCTGTCA	2	94.8947
	TGAATTCCATGGGTTGTGTCAGTGTCAGACCTGTGAAATTCAGTTCTTCAGCTGGGATATCTCTGTCATC	2	94.8947
	TGAATTCCATGGGTTGTGTCAGTGTCAGACCTGTGAAATTCAGTTCTTCAGCTGGGATATCTCTGTCATCG	2	94.8947
	TGAATTCCATGGGTTGTGTCAGTGTCAGACCTGTGAAATTCAGTTCTTCAG	1	47.4473
	TGAATTCCATGGGTTGTGTCAGTGTCAGACCTGTGAAATTCAGTTCTTCAGC	1	47.4473
	TGAATTCCATGGGTTGTGTCAGTGTCAGACCTGTGAAATTCAGTTCTTCAGCTG	1	47.4473
	TGAATTCCATGGGTTGTGTCAGTGTCAGACCTGTGAAATTCAGTTCTTCAGCTGG	1	47.4473
	TGAATTCCATGGGTTGTGTCAGTGTCAGACCTGTGAAATTCAGTTCTTCAGCTGGG	45	2135.13
	TGAATTCCATGGGTTGTGTCAGTGTCAGACCTGTGAAATTCAGTTCTTCAGCTGGGA	12	569.368
	TGAATTCCATGGGTTGTGTCAGTGTCAGACCTGTGAAATTCAGTTCTTCAGCTGGGAT	16	759.157
	TGAATTCCATGGGTTGTGTCAGTGTCAGACCTGTGAAATTCAGTTCTTCAGCTGGGATA	39	1850.45
	TGAATTCCATGGGTTGTGTCAGTGTCAGACCTGTGAAATTCAGTTCTTCAGCTGGGATAT	13	616.815
	TGAATTCCATGGGTTGTGTCAGTGTCAGACCTGTGAAATTCAGTTCTTCAGCTGGGATATC	38	1803
	TGAATTCCATGGGTTGTGTCAGTGTCAGACCTGTGAAATTCAGTTCTTCAGCTGGGATATCT	78	3700.89
	TGAATTCCATGGGTTGTGTCAGTGTCAGACCTGTGAAATTCAGTTCTTCAGCTGGGATATCTCTG	8	379.579
	TGAATTCCATGGGTTGTGTCAGTGTCAGACCTGTGAAATTCAGTTCTTCAGCTGGGATATCTCTGT	3	142.342
	GAATTCCATGGGTTGTGTCAGTGTCAGACCTGTGAAATTCAGTTCTTCAGCTGGGATATCTCTGTCATC	1	47.4473
	GAATTCCATGGGTTGTGTCAGTGTCAGACCTGTGAAATTCAGTTCTTCAGCTG	1	47.4473
	GAATTCCATGGGTTGTGTCAGTGTCAGACCTGTGAAATTCAGTTCTTCAGCTGGG	1	47.4473
	GAATTCCATGGGTTGTGTCAGTGTCAGACCTGTGAAATTCAGTTCTTCAGCTGGGA	1	47.4473
	GAATTCCATGGGTTGTGTCAGTGTCAGACCTGTGAAATTCAGTTCTTCAGCTGGGAT	2	94.8947
	GAATTCCATGGGTTGTGTCAGTGTCAGACCTGTGAAATTCAGTTCTTCAGCTGGGATA	3	142.342
	GAATTCCATGGGTTGTGTCAGTGTCAGACCTGTGAAATTCAGTTCTTCAGCTGGGATATC	1	47.4473
	GAATTCCATGGGTTGTGTCAGTGTCAGACCTGTGAAATTCAGTTCTTCAGCTGGGATATCT	4	189.789
	AATTCCATGGGTTGTGTCAGTGTCAGACCTGTGAAATTCAGTTCTTCAGCTGGGATATCTCTGTC	13	616.815
	AATTCCATGGGTTGTGTCAGTGTCAGACCTGTGAAATTCAGTTCTTCAGCTGGGATATCTCTGTCA	10	474.473
	AATTCCATGGGTTGTGTCAGTGTCAGACCTGTGAAATTCAGTTCTTCAGCTGGGATATCTCTGTCATC	2	94.8947
	AAGCCGATGTGTATCCTCAGCTTTGAGAACTGAATTCCATGGGTTGTGTC	1	47.4473
	AAGCCGATGTGTATCCTCAGCTTTGAGAACTGAATTCCATGGGTTGTGTCAGT	1	47.4473
	AATTCCATGGGTTGTGTCAGTGTCAGACCTGTGAAATTCAGTTCTTCAGCTGGG	2	94.8947
	AATTCCATGGGTTGTGTCAGTGTCAGACCTGTGAAATTCAGTTCTTCAGCTGGGA	1	47.4473
	AATTCCATGGGTTGTGTCAGTGTCAGACCTGTGAAATTCAGTTCTTCAGCTGGGATA	13	616.815
	AATTCCATGGGTTGTGTCAGTGTCAGACCTGTGAAATTCAGTTCTTCAGCTGGGATAT	6	284.684
	AATTCCATGGGTTGTGTCAGTGTCAGACCTGTGAAATTCAGTTCTTCAGCTGGGATATC	25	1186.18
	AATTCCATGGGTTGTGTCAGTGTCAGACCTGTGAAATTCAGTTCTTCAGCTGGGATATCT	47	2230.02
	AATTCCATGGGTTGTGTCAGTGTCAGACCTGTGAAATTCAGTTCTTCAGCTGGGATATCTC	17	806.605
	AATTCCATGGGTTGTGTCAGTGTCAGACCTGTGAAATTCAGTTCTTCAGCTGGGATATCTCT	11	521.921
	AAGCCGATGTGTATCCTCAGCTTTGAGAACTGAATTCCATGGGTTGTGTCAGTGTC	4	189.789
	AAGCCGATGTGTATCCTCAGCTTTGAGAACTGAATTCCATGGGTTGTGTCAGTGTCA	2	94.8947
	ATTCCATGGGTTGTGTCAGTGTCAGACCTGTGAAATTCAGTTCTTCAGCTGGGATATCTCTGTCA	6	284.684
	ATTCCATGGGTTGTGTCAGTGTCAGACCTGTGAAATTCAGTTCTTCAGCTGGGATATCTCTGTCAT	1	47.4473
	ATTCCATGGGTTGTGTCAGTGTCAGACCTGTGAAATTCAGTTCTTCAGCTGGGATATCTCTGTCATCG	1	47.4473
	AAGCCGATGTGTATCCTCAGCTTTGAGAACTGAATTCCATGGGTTGTGTCAGTGTCAG	4	189.789
	AAGCCGATGTGTATCCTCAGCTTTGAGAACTGAATTCCATGGGTTGTGTCAGTGTCAGA	20	948.947
	AAGCCGATGTGTATCCTCAGCTTTGAGAACTGAATTCCATGGGTTGTGTCAGTGTCAGAC	12	569.368
	AAGCCGATGTGTATCCTCAGCTTTGAGAACTGAATTCCATGGGTTGTGTCAGTGTCAGACC	34	1613.21
	AAGCCGATGTGTATCCTCAGCTTTGAGAACTGAATTCCATGGGTTGTGTCAGTGTCAGACCT	1	47.4473
	ATTCCATGGGTTGTGTCAGTGTCAGACCTGTGAAATTCAGTTCTTCAGCTGGG	1	47.4473
	AAGCCGATGTGTATCCTCAGCTTTGAGAACTGAATTCCATGGGTTGTGTCAGTGTCAGACCTGTG	19	901.499
	ATTCCATGGGTTGTGTCAGTGTCAGACCTGTGAAATTCAGTTCTTCAGCTGGGA	1	47.4473
	ATTCCATGGGTTGTGTCAGTGTCAGACCTGTGAAATTCAGTTCTTCAGCTGGGAT	1	47.4473
	ATTCCATGGGTTGTGTCAGTGTCAGACCTGTGAAATTCAGTTCTTCAGCTGGGATAT	3	142.342
	ATTCCATGGGTTGTGTCAGTGTCAGACCTGTGAAATTCAGTTCTTCAGCTGGGATATC	2	94.8947
	ATTCCATGGGTTGTGTCAGTGTCAGACCTGTGAAATTCAGTTCTTCAGCTGGGATATCT	16	759.157
	ATTCCATGGGTTGTGTCAGTGTCAGACCTGTGAAATTCAGTTCTTCAGCTGGGATATCTC	6	284.684
	ATTCCATGGGTTGTGTCAGTGTCAGACCTGTGAAATTCAGTTCTTCAGCTGGGATATCTCT	11	521.921
	ATTCCATGGGTTGTGTCAGTGTCAGACCTGTGAAATTCAGTTCTTCAGCTGGGATATCTCTG	4	189.789
	AAGCCGATGTGTATCCTCAGCTTTGAGAACTGAATTCCATGGGTTGTGTCAGTGTCAGACCTGTGA	4	189.789
	TTCCATGGGTTGTGTCAGTGTCAGACCTGTGAAATTCAGTTCTTCAGCTGGGATATCTCTGTCATC	8	379.579
	TTCCATGGGTTGTGTCAGTGTCAGACCTGTGAAATTCAGTTCTTCAGCTGGGATATCTCTGTCATCG	6	284.684
	TTCCATGGGTTGTGTCAGTGTCAGACCTGTGAAATTCAGTTCTTCAGCTGGGATAT	1	47.4473
	TTCCATGGGTTGTGTCAGTGTCAGACCTGTGAAATTCAGTTCTTCAGCTGGGATATC	2	94.8947
	TTCCATGGGTTGTGTCAGTGTCAGACCTGTGAAATTCAGTTCTTCAGCTGGGATATCT	12	569.368
	TTCCATGGGTTGTGTCAGTGTCAGACCTGTGAAATTCAGTTCTTCAGCTGGGATATCTC	5	237.237
	TTCCATGGGTTGTGTCAGTGTCAGACCTGTGAAATTCAGTTCTTCAGCTGGGATATCTCT	7	332.131
	TTCCATGGGTTGTGTCAGTGTCAGACCTGTGAAATTCAGTTCTTCAGCTGGGATATCTCTG	18	854.052
	TTCCATGGGTTGTGTCAGTGTCAGACCTGTGAAATTCAGTTCTTCAGCTGGGATATCTCTGT	9	427.026
	TCCATGGGTTGTGTCAGTGTCAGACCTGTGAAATTCAGTTCTTCAGCTGGGATATCTCTGTC	7	332.131
	TCCATGGGTTGTGTCAGTGTCAGACCTGTGAAATTCAGTTCTTCAGCTGGGATATCTCTGTCATC	17	806.605
	TCCATGGGTTGTGTCAGTGTCAGACCTGTGAAATTCAGTTCTTCAGCTGGGATATCTCTGTCATCG	8	379.579
	TCCATGGGTTGTGTCAGTGTCAGACCTGTGAAATTCAGTTCTTCAGCTGGGA	1	47.4473
	TCCATGGGTTGTGTCAGTGTCAGACCTGTGAAATTCAGTTCTTCAGCTGGGATATC	2	94.8947
	TCCATGGGTTGTGTCAGTGTCAGACCTGTGAAATTCAGTTCTTCAGCTGGGATATCT	7	332.131
	TCCATGGGTTGTGTCAGTGTCAGACCTGTGAAATTCAGTTCTTCAGCTGGGATATCTC	1	47.4473
	TCCATGGGTTGTGTCAGTGTCAGACCTGTGAAATTCAGTTCTTCAGCTGGGATATCTCT	1	47.4473
	TCCATGGGTTGTGTCAGTGTCAGACCTGTGAAATTCAGTTCTTCAGCTGGGATATCTCTG	8	379.579
	TCCATGGGTTGTGTCAGTGTCAGACCTGTGAAATTCAGTTCTTCAGCTGGGATATCTCTGT	8	379.579
	CCATGGGTTGTGTCAGTGTCAGACCTGTGAAATTCAGTTCTTCAGCTGGGATATCTCTGTC	18	854.052
	CCATGGGTTGTGTCAGTGTCAGACCTGTGAAATTCAGTTCTTCAGCTGGGATATCTCTGTCA	19	901.499
	CCATGGGTTGTGTCAGTGTCAGACCTGTGAAATTCAGTTCTTCAGCTGGGATATCTCTGTCATC	1	47.4473
	CCATGGGTTGTGTCAGTGTCAGACCTGTGAAATTCAGTTCTTCAGCTGGGATATCTCTGTCATCG	17	806.605
	CCATGGGTTGTGTCAGTGTCAGACCTGTGAAATTCAGTTCTTCAGCTGGG	1	47.4473
	CCATGGGTTGTGTCAGTGTCAGACCTGTGAAATTCAGTTCTTCAGCTGGGATATCT	6	284.684
	CCATGGGTTGTGTCAGTGTCAGACCTGTGAAATTCAGTTCTTCAGCTGGGATATCTC	4	189.789
	CCATGGGTTGTGTCAGTGTCAGACCTGTGAAATTCAGTTCTTCAGCTGGGATATCTCT	5	237.237
	CCATGGGTTGTGTCAGTGTCAGACCTGTGAAATTCAGTTCTTCAGCTGGGATATCTCTG	20	948.947
	CCATGGGTTGTGTCAGTGTCAGACCTGTGAAATTCAGTTCTTCAGCTGGGATATCTCTGT	13	616.815
	CATGGGTTGTGTCAGTGTCAGACCTGTGAAATTCAGTTCTTCAGCTGGGATATCTCTGTC	15	711.71
	CATGGGTTGTGTCAGTGTCAGACCTGTGAAATTCAGTTCTTCAGCTGGGATATCTCTGTCA	34	1613.21
	CATGGGTTGTGTCAGTGTCAGACCTGTGAAATTCAGTTCTTCAGCTGGGATATCTCTGTCAT	3	142.342
	CATGGGTTGTGTCAGTGTCAGACCTGTGAAATTCAGTTCTTCAGCTGGGATATCT	4	189.789
	CATGGGTTGTGTCAGTGTCAGACCTGTGAAATTCAGTTCTTCAGCTGGGATATCTC	1	47.4473
	CATGGGTTGTGTCAGTGTCAGACCTGTGAAATTCAGTTCTTCAGCTGGGATATCTCT	2	94.8947
	CATGGGTTGTGTCAGTGTCAGACCTGTGAAATTCAGTTCTTCAGCTGGGATATCTCTG	8	379.579
	CATGGGTTGTGTCAGTGTCAGACCTGTGAAATTCAGTTCTTCAGCTGGGATATCTCTGT	12	569.368
	ATGGGTTGTGTCAGTGTCAGACCTGTGAAATTCAGTTCTTCAGCTGGGATATCTCTGTC	57	2704.5
	ATGGGTTGTGTCAGTGTCAGACCTGTGAAATTCAGTTCTTCAGCTGGGATATCTCTGTCA	45	2135.13
	ATGGGTTGTGTCAGTGTCAGACCTGTGAAATTCAGTTCTTCAGCTGGGATATCTCTGTCAT	22	1043.84
	ATGGGTTGTGTCAGTGTCAGACCTGTGAAATTCAGTTCTTCAGCTGGGATATCTCTGTCATC	235	11150.1
	ATGGGTTGTGTCAGTGTCAGACCTGTGAAATTCAGTTCTTCAGCTGGGATATCT	12	569.368
	ATGGGTTGTGTCAGTGTCAGACCTGTGAAATTCAGTTCTTCAGCTGGGATATCTC	3	142.342
	ATGGGTTGTGTCAGTGTCAGACCTGTGAAATTCAGTTCTTCAGCTGGGATATCTCT	4	189.789
	ATGGGTTGTGTCAGTGTCAGACCTGTGAAATTCAGTTCTTCAGCTGGGATATCTCTG	14	664.263
	ATGGGTTGTGTCAGTGTCAGACCTGTGAAATTCAGTTCTTCAGCTGGGATATCTCTGT	5	237.237
	TGGGTTGTGTCAGTGTCAGACCTGTGAAATTCAGTTCTTCAGCTGGGATATCTCTGTC	44	2087.68
	TGGGTTGTGTCAGTGTCAGACCTGTGAAATTCAGTTCTTCAGCTGGGATATCTCTGTCA	100	4744.73
	TGGGTTGTGTCAGTGTCAGACCTGTGAAATTCAGTTCTTCAGCTGGGATATCTCTGTCAT	35	1660.66
	TGGGTTGTGTCAGTGTCAGACCTGTGAAATTCAGTTCTTCAGCTGGGATATCTCTGTCATC	509	24150.7
	TGGGTTGTGTCAGTGTCAGACCTGTGAAATTCAGTTCTTCAGCTGGGATATCTCTGTCATCG	495	23486.4
	TGGGTTGTGTCAGTGTCAGACCTGTGAAATTCAGTTCTTCAGCTGGGATATCT	1	47.4473
	TGGGTTGTGTCAGTGTCAGACCTGTGAAATTCAGTTCTTCAGCTGGGATATCTC	2	94.8947
	TGGGTTGTGTCAGTGTCAGACCTGTGAAATTCAGTTCTTCAGCTGGGATATCTCT	2	94.8947
	TGGGTTGTGTCAGTGTCAGACCTGTGAAATTCAGTTCTTCAGCTGGGATATCTCTG	18	854.052
	TGGGTTGTGTCAGTGTCAGACCTGTGAAATTCAGTTCTTCAGCTGGGATATCTCTGT	11	521.921
	GGGTTGTGTCAGTGTCAGACCTGTGAAATTCAGTTCTTCAGCTGGGATATCTCTGTC	4	189.789
	GGGTTGTGTCAGTGTCAGACCTGTGAAATTCAGTTCTTCAGCTGGGATATCTCTGTCA	4	189.789
	GGGTTGTGTCAGTGTCAGACCTGTGAAATTCAGTTCTTCAGCTGGGATATCTCTGTCAT	6	284.684
	GGGTTGTGTCAGTGTCAGACCTGTGAAATTCAGTTCTTCAGCTGGGATATCTCTGTCATC	49	2324.92
	GGGTTGTGTCAGTGTCAGACCTGTGAAATTCAGTTCTTCAGCTGGGATATCTCTGTCATCG	54	2562.16
	GGGTTGTGTCAGTGTCAGACCTGTGAAATTCAGTTCTTCAGCTGGGATATCTCTG	1	47.4473
	GGGTTGTGTCAGTGTCAGACCTGTGAAATTCAGTTCTTCAGCTGGGATATCTCTGT	1	47.4473
	GGTTGTGTCAGTGTCAGACCTGTGAAATTCAGTTCTTCAGCTGGGATATCTCTGTC	2	94.8947
	GGTTGTGTCAGTGTCAGACCTGTGAAATTCAGTTCTTCAGCTGGGATATCTCTGTCA	4	189.789
	GGTTGTGTCAGTGTCAGACCTGTGAAATTCAGTTCTTCAGCTGGGATATCTCTGTCAT	2	94.8947
	GGTTGTGTCAGTGTCAGACCTGTGAAATTCAGTTCTTCAGCTGGGATATCTCTGTCATC	12	569.368
	GGTTGTGTCAGTGTCAGACCTGTGAAATTCAGTTCTTCAGCTGGGATATCTCTGTCATCG	24	1138.74
	GTTGTGTCAGTGTCAGACCTGTGAAATTCAGTTCTTCAGCTGGGATATCTCTGTC	1	47.4473
	GTTGTGTCAGTGTCAGACCTGTGAAATTCAGTTCTTCAGCTGGGATATCTCTGTCA	1	47.4473
	GTTGTGTCAGTGTCAGACCTGTGAAATTCAGTTCTTCAGCTGGGATATCTCTGTCAT	2	94.8947
	GTTGTGTCAGTGTCAGACCTGTGAAATTCAGTTCTTCAGCTGGGATATCTCTGTCATC	12	569.368
	GTTGTGTCAGTGTCAGACCTGTGAAATTCAGTTCTTCAGCTGGGATATCTCTGTCATCG	8	379.579
	AGCCGATGTGTATCCTCAGCTTTGAGAACTGAATTCCATGGGTTGTGTCAGTGT	2	94.8947
	AGCCGATGTGTATCCTCAGCTTTGAGAACTGAATTCCATGGGTTGTGTCAGTGTC	7	332.131
	TTGTGTCAGTGTCAGACCTGTGAAATTCAGTTCTTCAGCTGGGATATCTCTGTC	2	94.8947
	TTGTGTCAGTGTCAGACCTGTGAAATTCAGTTCTTCAGCTGGGATATCTCTGTCA	7	332.131
	TTGTGTCAGTGTCAGACCTGTGAAATTCAGTTCTTCAGCTGGGATATCTCTGTCAT	6	284.684
	TTGTGTCAGTGTCAGACCTGTGAAATTCAGTTCTTCAGCTGGGATATCTCTGTCATC	111	5266.65
	TTGTGTCAGTGTCAGACCTGTGAAATTCAGTTCTTCAGCTGGGATATCTCTGTCATCG	229	10865.4
	AGCCGATGTGTATCCTCAGCTTTGAGAACTGAATTCCATGGGTTGTGTCAGTGTCAG	4	189.789
	AGCCGATGTGTATCCTCAGCTTTGAGAACTGAATTCCATGGGTTGTGTCAGTGTCAGA	9	427.026
	AGCCGATGTGTATCCTCAGCTTTGAGAACTGAATTCCATGGGTTGTGTCAGTGTCAGAC	9	427.026
	AGCCGATGTGTATCCTCAGCTTTGAGAACTGAATTCCATGGGTTGTGTCAGTGTCAGACC	15	711.71
	AGCCGATGTGTATCCTCAGCTTTGAGAACTGAATTCCATGGGTTGTGTCAGTGTCAGACCT	3	142.342
	AGCCGATGTGTATCCTCAGCTTTGAGAACTGAATTCCATGGGTTGTGTCAGTGTCAGACCTG	3	142.342
	TTGTGTCAGTGTCAGACCTGTGAAATTCAGTTCTTCAGCTGGGATATCTCTGT	1	47.4473
	AGCCGATGTGTATCCTCAGCTTTGAGAACTGAATTCCATGGGTTGTGTCAGTGTCAGACCTGTGA	1	47.4473
	TGTGTCAGTGTCAGACCTGTGAAATTCAGTTCTTCAGCTGGGATATCTCTGTCA	1	47.4473
	TGTGTCAGTGTCAGACCTGTGAAATTCAGTTCTTCAGCTGGGATATCTCTGTCATC	10	474.473
	TGTGTCAGTGTCAGACCTGTGAAATTCAGTTCTTCAGCTGGGATATCTCTGTCATCG	35	1660.66
	GTGTCAGTGTCAGACCTGTGAAATTCAGTTCTTCAGCTGGGATATCTCTGTCAT	1	47.4473
	GTGTCAGTGTCAGACCTGTGAAATTCAGTTCTTCAGCTGGGATATCTCTGTCATC	7	332.131
	GTGTCAGTGTCAGACCTGTGAAATTCAGTTCTTCAGCTGGGATATCTCTGTCATCG	19	901.499
	GTGTCAGTGTCAGACCTGTGAAATTCAGTTCTTCAGCTGGGATATCTCTGT	1	47.4473
	GTGTCAGTGTCAGACCTGTGAAATTCAGTTCTTCAGCTGGGATATCTCTGT	1	47.4473
	TGTCAGTGTCAGACCTGTGAAATTCAGTTCTTCAGCTGGGATATCTCTGTCATC	3	142.342
	TGTCAGTGTCAGACCTGTGAAATTCAGTTCTTCAGCTGGGATATCTCTGTCATCG	5	237.237
	GTCAGTGTCAGACCTGTGAAATTCAGTTCTTCAGCTGGGATATCTCTGTC	1	47.4473
	GTCAGTGTCAGACCTGTGAAATTCAGTTCTTCAGCTGGGATATCTCTGTCATC	2	94.8947
	GTCAGTGTCAGACCTGTGAAATTCAGTTCTTCAGCTGGGATATCTCTGTCATCG	4	189.789
	TCAGTGTCAGACCTGTGAAATTCAGTTCTTCAGCTGGGATATCTCTGTCATCG	3	142.342
	CAGTGTCAGACCTGTGAAATTCAGTTCTTCAGCTGGGATATCTCTGTCAT	1	47.4473
	CAGTGTCAGACCTGTGAAATTCAGTTCTTCAGCTGGGATATCTCTGTCATC	4	189.789
	CAGTGTCAGACCTGTGAAATTCAGTTCTTCAGCTGGGATATCTCTGTCATCG	2	94.8947
	AGTGTCAGACCTGTGAAATTCAGTTCTTCAGCTGGGATATCTCTGTCATC	24	1138.74
	AGTGTCAGACCTGTGAAATTCAGTTCTTCAGCTGGGATATCTCTGTCATCG	19	901.499
	GTGTCAGACCTGTGAAATTCAGTTCTTCAGCTGGGATATCTCTGTCATCG	23	1091.29
	GCCGATGTGTATCCTCAGCTTTGAGAACTGAATTCCATGGGTTGTGTCAG	1	47.4473
	GCCGATGTGTATCCTCAGCTTTGAGAACTGAATTCCATGGGTTGTGTCAGT	1	47.4473
	GCCGATGTGTATCCTCAGCTTTGAGAACTGAATTCCATGGGTTGTGTCAGTGTC	3	142.342
	GCCGATGTGTATCCTCAGCTTTGAGAACTGAATTCCATGGGTTGTGTCAGTGTCAG	4	189.789
	GCCGATGTGTATCCTCAGCTTTGAGAACTGAATTCCATGGGTTGTGTCAGTGTCAGA	7	332.131
	GCCGATGTGTATCCTCAGCTTTGAGAACTGAATTCCATGGGTTGTGTCAGTGTCAGAC	5	237.237
	GCCGATGTGTATCCTCAGCTTTGAGAACTGAATTCCATGGGTTGTGTCAGTGTCAGACC	7	332.131
	GCCGATGTGTATCCTCAGCTTTGAGAACTGAATTCCATGGGTTGTGTCAGTGTCAGACCTG	3	142.342
	GCCGATGTGTATCCTCAGCTTTGAGAACTGAATTCCATGGGTTGTGTCAGTGTCAGACCTGT	1	47.4473
	GCCGATGTGTATCCTCAGCTTTGAGAACTGAATTCCATGGGTTGTGTCAGTGTCAGACCTGTGAA	1	47.4473
	CCGATGTGTATCCTCAGCTTTGAGAACTGAATTCCATGGGTTGTGTCAGTGTC	1	47.4473
	CCGATGTGTATCCTCAGCTTTGAGAACTGAATTCCATGGGTTGTGTCAGTGTCAG	3	142.342
	CCGATGTGTATCCTCAGCTTTGAGAACTGAATTCCATGGGTTGTGTCAGTGTCAGA	5	237.237
	CCGATGTGTATCCTCAGCTTTGAGAACTGAATTCCATGGGTTGTGTCAGTGTCAGACC	9	427.026
	CCGATGTGTATCCTCAGCTTTGAGAACTGAATTCCATGGGTTGTGTCAGTGTCAGACCT	1	47.4473
	CCGATGTGTATCCTCAGCTTTGAGAACTGAATTCCATGGGTTGTGTCAGTGTCAGACCTG	1	47.4473
	CCGATGTGTATCCTCAGCTTTGAGAACTGAATTCCATGGGTTGTGTCAGTGTCAGACCTGT	4	189.789
	CCGATGTGTATCCTCAGCTTTGAGAACTGAATTCCATGGGTTGTGTCAGTGTCAGACCTGTG	7	332.131
	CGATGTGTATCCTCAGCTTTGAGAACTGAATTCCATGGGTTGTGTCAGTGTC	1	47.4473
	CGATGTGTATCCTCAGCTTTGAGAACTGAATTCCATGGGTTGTGTCAGTGTCA	1	47.4473
	CGATGTGTATCCTCAGCTTTGAGAACTGAATTCCATGGGTTGTGTCAGTGTCAG	1	47.4473
	CGATGTGTATCCTCAGCTTTGAGAACTGAATTCCATGGGTTGTGTCAGTGTCAGA	5	237.237
	CGATGTGTATCCTCAGCTTTGAGAACTGAATTCCATGGGTTGTGTCAGTGTCAGAC	8	379.579
	CGATGTGTATCCTCAGCTTTGAGAACTGAATTCCATGGGTTGTGTCAGTGTCAGACC	33	1565.76
	CGATGTGTATCCTCAGCTTTGAGAACTGAATTCCATGGGTTGTGTCAGTGTCAGACCT	12	569.368
	CGATGTGTATCCTCAGCTTTGAGAACTGAATTCCATGGGTTGTGTCAGTGTCAGACCTG	42	1992.79
	CGATGTGTATCCTCAGCTTTGAGAACTGAATTCCATGGGTTGTGTCAGTGTCAGACCTGT	22	1043.84
	CGATGTGTATCCTCAGCTTTGAGAACTGAATTCCATGGGTTGTGTCAGTGTCAGACCTGTG	86	4080.47
	CGATGTGTATCCTCAGCTTTGAGAACTGAATTCCATGGGTTGTGTCAGTGTCAGACCTGTGA	32	1518.31
	CGATGTGTATCCTCAGCTTTGAGAACTGAATTCCATGGGTTGTGTCAGTGTCAGACCTGTGAAA	1	47.4473
	CGATGTGTATCCTCAGCTTTGAGAACTGAATTCCATGGGTTGTGTCAGTGTCAGACCTGTGAAAT	4	189.789
	CGATGTGTATCCTCAGCTTTGAGAACTGAATTCCATGGGTTGTGTCAGTGTCAGACCTGTGAAATT	2	94.8947
	CGATGTGTATCCTCAGCTTTGAGAACTGAATTCCATGGGTTGTGTCAGTGTCAGACCTGTGAAATTC	1	47.4473
	CGATGTGTATCCTCAGCTTTGAGAACTGAATTCCATGGGTTGTGTCAGTGTCAGACCTGTGAAATTCA	1	47.4473
	CGATGTGTATCCTCAGCTTTGAGAACTGAATTCCATGGGTTGTGTCAGTGTCAGACCTGTGAAATTCAGTTCTT	1	47.4473
	GATGTGTATCCTCAGCTTTGAGAACTGAATTCCATGGGTTGTGTCAGTGTC	1	47.4473
	GATGTGTATCCTCAGCTTTGAGAACTGAATTCCATGGGTTGTGTCAGTGTCAGA	3	142.342
	GATGTGTATCCTCAGCTTTGAGAACTGAATTCCATGGGTTGTGTCAGTGTCAGAC	4	189.789
	GATGTGTATCCTCAGCTTTGAGAACTGAATTCCATGGGTTGTGTCAGTGTCAGACC	9	427.026
	GATGTGTATCCTCAGCTTTGAGAACTGAATTCCATGGGTTGTGTCAGTGTCAGACCT	9	427.026
	GATGTGTATCCTCAGCTTTGAGAACTGAATTCCATGGGTTGTGTCAGTGTCAGACCTG	16	759.157
	GATGTGTATCCTCAGCTTTGAGAACTGAATTCCATGGGTTGTGTCAGTGTCAGACCTGT	14	664.263
	GATGTGTATCCTCAGCTTTGAGAACTGAATTCCATGGGTTGTGTCAGTGTCAGACCTGTG	53	2514.71
	GATGTGTATCCTCAGCTTTGAGAACTGAATTCCATGGGTTGTGTCAGTGTCAGACCTGTGA	24	1138.74
	GATGTGTATCCTCAGCTTTGAGAACTGAATTCCATGGGTTGTGTCAGTGTCAGACCTGTGAA	6	284.684
	GATGTGTATCCTCAGCTTTGAGAACTGAATTCCATGGGTTGTGTCAGTGTCAGACCTGTGAAATT	2	94.8947
	GATGTGTATCCTCAGCTTTGAGAACTGAATTCCATGGGTTGTGTCAGTGTCAGACCTGTGAAATTC	1	47.4473
	GATGTGTATCCTCAGCTTTGAGAACTGAATTCCATGGGTTGTGTCAGTGTCAGACCTGTGAAATTCAGTTCTT	1	47.4473
	GATGTGTATCCTCAGCTTTGAGAACTGAATTCCATGGGTTGTGTCAGTGTCAGACCTGTGAAATTCAGTTCTTC	1	47.4473
	ATGTGTATCCTCAGCTTTGAGAACTGAATTCCATGGGTTGTGTCAGTGTCAGAC	1	47.4473
	ATGTGTATCCTCAGCTTTGAGAACTGAATTCCATGGGTTGTGTCAGTGTCAGACC	2	94.8947
	ATGTGTATCCTCAGCTTTGAGAACTGAATTCCATGGGTTGTGTCAGTGTCAGACCTG	8	379.579
	ATGTGTATCCTCAGCTTTGAGAACTGAATTCCATGGGTTGTGTCAGTGTCAGACCTGT	6	284.684
	ATGTGTATCCTCAGCTTTGAGAACTGAATTCCATGGGTTGTGTCAGTGTCAGACCTGTG	46	2182.58
	ATGTGTATCCTCAGCTTTGAGAACTGAATTCCATGGGTTGTGTCAGTGTCAGACCTGTGA	23	1091.29
	ATGTGTATCCTCAGCTTTGAGAACTGAATTCCATGGGTTGTGTCAGTGTCAGACCTGTGAA	3	142.342
	ATGTGTATCCTCAGCTTTGAGAACTGAATTCCATGGGTTGTGTCAGTGTCAGACCTGTGAAA	7	332.131
	ATGTGTATCCTCAGCTTTGAGAACTGAATTCCATGGGTTGTGTCAGTGTCAGACCTGTGAAATTC	2	94.8947
	ATGTGTATCCTCAGCTTTGAGAACTGAATTCCATGGGTTGTGTCAGTGTCAGACCTGTGAAATTCA	1	47.4473
Pri-mir-146a_G UPC	GGGGAAGCCGATGTGTATCCTCAGC	1	21.8895
	GGGAAGCCGATGTGTATCCTCAGCT	5	109.448
	GGGGAAGCCGATGTGTATCCTCAGCT	3	65.6685
	GGGGAAGCCGATGTGTATCCTCAGCTT	1	21.8895
	GGGAAGCCGATGTGTATCCTCAGCTTT	1	21.8895
	GGGAAGCCGATGTGTATCCTCAGCTTT	1	21.8895
	GGGGAAGCCGATGTGTATCCTCAGCTTT	1	21.8895
	GGGAAGCCGATGTGTATCCTCAGCTTTG	1	21.8895
	GGGAAGCCGATGTGTATCCTCAGCTTTG	6	131.337
	GGGGAAGCCGATGTGTATCCTCAGCTTTG	1	21.8895
	GGGAAGCCGATGTGTATCCTCAGCTTTGA	62	1357.15
	GGGGAAGCCGATGTGTATCCTCAGCTTTGA	15	328.343
	GGGAAGCCGATGTGTATCCTCAGCTTTGAG	155	3392.87
	GGGGAAGCCGATGTGTATCCTCAGCTTTGAG	39	853.691
	GGGAAGCCGATGTGTATCCTCAGCTTTGAGA	2	43.779
	GGGAAGCCGATGTGTATCCTCAGCTTTGAGA	252	5516.15
	GGGGAAGCCGATGTGTATCCTCAGCTTTGAGA	1	21.8895
	GGGGAAGCCGATGTGTATCCTCAGCTTTGAGA	85	1860.61
	GGGAAGCCGATGTGTATCCTCAGCTTTGAGAA	262	5735.05
	GGGGAAGCCGATGTGTATCCTCAGCTTTGAGAA	71	1554.15
	GGGAAGCCGATGTGTATCCTCAGCTTTGAGAAC	2	43.779
	GGGAAGCCGATGTGTATCCTCAGCTTTGAGAAC	492	10769.6
	GGGGAAGCCGATGTGTATCCTCAGCTTTGAGAAC	84	1838.72
	GGGAAGCCGATGTGTATCCTCAGCTTTGAGAACT	3	65.6685
	GGGAAGCCGATGTGTATCCTCAGCTTTGAGAACT	488	10682.1
	GGGGAAGCCGATGTGTATCCTCAGCTTTGAGAACT	118	2582.96
	GGGAAGCCGATGTGTATCCTCAGCTTTGAGAACTG	1	21.8895
	GGGAAGCCGATGTGTATCCTCAGCTTTGAGAACTG	475	10397.5
	GGGGAAGCCGATGTGTATCCTCAGCTTTGAGAACTG	150	3283.43
	GGGAAGCCGATGTGTATCCTCAGCTTTGAGAACTGA	3	65.6685
	GGGAAGCCGATGTGTATCCTCAGCTTTGAGAACTGA	512	11207.4
	GGGGAAGCCGATGTGTATCCTCAGCTTTGAGAACTGA	117	2561.07
	CGGGAAGCCGATGTGTATCCTCAGCTTTGAGAACTGAA	1	21.8895
	GGGAAGCCGATGTGTATCCTCAGCTTTGAGAACTGAA	7	153.227
	GGGAAGCCGATGTGTATCCTCAGCTTTGAGAACTGAA	274	5997.72
	GGGGAAGCCGATGTGTATCCTCAGCTTTGAGAACTGAA	1	21.8895
	GGGGAAGCCGATGTGTATCCTCAGCTTTGAGAACTGAA	53	1160.14
	GGGAAGCCGATGTGTATCCTCAGCTTTGAGAACTGAAT	1	21.8895
	GGGAAGCCGATGTGTATCCTCAGCTTTGAGAACTGAAT	1291	28259.3
	GGGGAAGCCGATGTGTATCCTCAGCTTTGAGAACTGAAT	287	6282.29
	GGGAAGCCGATGTGTATCCTCAGCTTTGAGAACTGAATT	1	21.8895
	GGGAAGCCGATGTGTATCCTCAGCTTTGAGAACTGAATT	122	2670.52
	GGGGAAGCCGATGTGTATCCTCAGCTTTGAGAACTGAATT	20	437.79
	GGGAAGCCGATGTGTATCCTCAGCTTTGAGAACTGAATTC	1	21.8895
	GGGAAGCCGATGTGTATCCTCAGCTTTGAGAACTGAATTCC	10	218.895
	GGGGAAGCCGATGTGTATCCTCAGCTTTGAGAACTGAATTCC	3	65.6685
	GGGAAGCCGATGTGTATCCTCAGCTTTGAGAACTGAATTCCA	7	153.227
	GGGGAAGCCGATGTGTATCCTCAGCTTTGAGAACTGAATTCCA	1	21.8895
	GGGAAGCCGATGTGTATCCTCAGCTTTGAGAACTGAATTCCAT	1	21.8895
	GGGAAGCCGATGTGTATCCTCAGCTTTGAGAACTGAATTCCAT	10	218.895
	GGGGAAGCCGATGTGTATCCTCAGCTTTGAGAACTGAATTCCAT	2	43.779
	GGGAAGCCGATGTGTATCCTCAGCTTTGAGAACTGAATTCCATG	1	21.8895
	GGGAAGCCGATGTGTATCCTCAGCTTTGAGAACTGAATTCCATG	1	21.8895
	GGGAAGCCGATGTGTATCCTCAGCTTTGAGAACTGAATTCCATGGG	5	109.448
	GGGAAGCCGATGTGTATCCTCAGCTTTGAGAACTGAATTCCATGGGTTGT	1	21.8895
	GGGAAGCCGATGTGTATCCTCAGCTTTGAGAACTGAATTCCATGGGTTGTGT	1	21.8895
	GGGAAGCCGATGTGTATCCTCAGCTTTGAGAACTGAATTCCATGGGTTGTGTC	12	262.674
	GGGGAAGCCGATGTGTATCCTCAGCTTTGAGAACTGAATTCCATGGGTTGTGTC	3	65.6685
	TGTGTATCCTCAGCTTTGAGAACTG	5	109.448
	TGTGTATCCTCAGCTTTGAGAACTG	1	21.8895
	TGTGTATCCTCAGCTTTGAGAACTGA	8	175.116
	TGTGTATCCTCAGCTTTGAGAACTGA	4	87.558
	TGTGTATCCTCAGCTTTGAGAACTGAA	62	1357.15
	TGTGTATCCTCAGCTTTGAGAACTGAA	1	21.8895
	TGTGTATCCTCAGCTTTGAGAACTGAAT	22	481.569
	TGTGTATCCTCAGCTTTGAGAACTGAAT	26	569.127
	TGTGTATCCTCAGCTTTGAGAACTGAATT	264	5778.83
	TGTGTATCCTCAGCTTTGAGAACTGAATT	12	262.674
	TGTGTATCCTCAGCTTTGAGAACTGAATTC	301	6588.74
	TGTGTATCCTCAGCTTTGAGAACTGAATTC	2	43.779
	TGTGTATCCTCAGCTTTGAGAACTGAATTCC	62	1357.15
	TGTGTATCCTCAGCTTTGAGAACTGAATTCC	33	722.354
	TGTGTATCCTCAGCTTTGAGAACTGAATTCCA	268	5866.39
	TGTGTATCCTCAGCTTTGAGAACTGAATTCCA	42	919.359
	TGTGTATCCTCAGCTTTGAGAACTGAATTCCAT	33	722.354
	TGTGTATCCTCAGCTTTGAGAACTGAATTCCAT	14	306.453
	TGTGTATCCTCAGCTTTGAGAACTGAATTCCATG	336	7354.87
	TGTGTATCCTCAGCTTTGAGAACTGAATTCCATG	14	306.453
	TGTGTATCCTCAGCTTTGAGAACTGAATTCCATGG	8	175.116
	TGTGTATCCTCAGCTTTGAGAACTGAATTCCATGG	6	131.337
	TGTGTATCCTCAGCTTTGAGAACTGAATTCCATGGG	2	43.779
	TGTGTATCCTCAGCTTTGAGAACTGAATTCCATGGG	47	1028.81
	TGTGTATCCTCAGCTTTGAGAACTGAATTCCATGGGT	2	43.779
	TGTGTATCCTCAGCTTTGAGAACTGAATTCCATGGGT	3	65.6685
	TGTGTATCCTCAGCTTTGAGAACTGAATTCCATGGGTT	3	65.6685
	TGTGTATCCTCAGCTTTGAGAACTGAATTCCATGGGTTG	1	21.8895
	TGTGTATCCTCAGCTTTGAGAACTGAATTCCATGGGTTG	3	65.6685
	TGTGTATCCTCAGCTTTGAGAACTGAATTCCATGGGTTGTGTC	2	43.779
	GTGTATCCTCAGCTTTGAGAACTGA	3	65.6685
	GTGTATCCTCAGCTTTGAGAACTGA	1	21.8895
	GTGTATCCTCAGCTTTGAGAACTGAA	17	372.122
	GTGTATCCTCAGCTTTGAGAACTGAA	1	21.8895
	GTGTATCCTCAGCTTTGAGAACTGAAT	5	109.448
	GTGTATCCTCAGCTTTGAGAACTGAAT	10	218.895
	GTGTATCCTCAGCTTTGAGAACTGAATT	34	744.243
	GTGTATCCTCAGCTTTGAGAACTGAATT	5	109.448
	GTGTATCCTCAGCTTTGAGAACTGAATTC	53	1160.14
	GTGTATCCTCAGCTTTGAGAACTGAATTC	1	21.8895
	GTGTATCCTCAGCTTTGAGAACTGAATTCC	20	437.79
	GTGTATCCTCAGCTTTGAGAACTGAATTCC	17	372.122
	GTGTATCCTCAGCTTTGAGAACTGAATTCCA	111	2429.73
	GTGTATCCTCAGCTTTGAGAACTGAATTCCA	14	306.453
	GTGTATCCTCAGCTTTGAGAACTGAATTCCAT	14	306.453
	GTGTATCCTCAGCTTTGAGAACTGAATTCCAT	1	21.8895
	GTGTATCCTCAGCTTTGAGAACTGAATTCCATG	183	4005.78
	GTGTATCCTCAGCTTTGAGAACTGAATTCCATG	8	175.116
	GTGTATCCTCAGCTTTGAGAACTGAATTCCATGG	6	131.337
	GTGTATCCTCAGCTTTGAGAACTGAATTCCATGG	4	87.558
	GTGTATCCTCAGCTTTGAGAACTGAATTCCATGGG	27	591.017
	GTGTATCCTCAGCTTTGAGAACTGAATTCCATGGGT	2	43.779
	GTGTATCCTCAGCTTTGAGAACTGAATTCCATGGGT	1	21.8895
	GTGTATCCTCAGCTTTGAGAACTGAATTCCATGGGTTGTGT	1	21.8895
	GTGTATCCTCAGCTTTGAGAACTGAATTCCATGGGTTGTGTC	1	21.8895
	TGTATCCTCAGCTTTGAGAACTGAA	14	306.453
	TGTATCCTCAGCTTTGAGAACTGAAT	6	131.337
	TGTATCCTCAGCTTTGAGAACTGAAT	4	87.558
	TGTATCCTCAGCTTTGAGAACTGAATT	34	744.243
	TGTATCCTCAGCTTTGAGAACTGAATTC	55	1203.92
	TGTATCCTCAGCTTTGAGAACTGAATTCC	34	744.243
	TGTATCCTCAGCTTTGAGAACTGAATTCCA	193	4224.67
	TGTATCCTCAGCTTTGAGAACTGAATTCCA	9	197.006
	TGTATCCTCAGCTTTGAGAACTGAATTCCAT	25	547.238
	TGTATCCTCAGCTTTGAGAACTGAATTCCAT	9	197.006
	TGTATCCTCAGCTTTGAGAACTGAATTCCATG	335	7332.98
	TGTATCCTCAGCTTTGAGAACTGAATTCCATG	14	306.453
	TGTATCCTCAGCTTTGAGAACTGAATTCCATGG	13	284.564
	TGTATCCTCAGCTTTGAGAACTGAATTCCATGG	2	43.779
	TGTATCCTCAGCTTTGAGAACTGAATTCCATGGG	5	109.448
	TGTATCCTCAGCTTTGAGAACTGAATTCCATGGG	34	744.243
	TGTATCCTCAGCTTTGAGAACTGAATTCCATGGGT	3	65.6685
	TGTATCCTCAGCTTTGAGAACTGAATTCCATGGGT	3	65.6685
	TGTATCCTCAGCTTTGAGAACTGAATTCCATGGGTT	4	87.558
	TGTATCCTCAGCTTTGAGAACTGAATTCCATGGGTTG	14	306.453
	TGTATCCTCAGCTTTGAGAACTGAATTCCATGGGTTGT	1	21.8895
	TGTATCCTCAGCTTTGAGAACTGAATTCCATGGGTTGTGTCAGT	1	21.8895
	GGAAGCCGATGTGTATCCTCAGCTT	1	21.8895
	GGAAGCCGATGTGTATCCTCAGCTTT	1	21.8895
	GGAAGCCGATGTGTATCCTCAGCTTTG	1	21.8895
	GGAAGCCGATGTGTATCCTCAGCTTTG	1	21.8895
	GGAAGCCGATGTGTATCCTCAGCTTTGA	10	218.895
	GGAAGCCGATGTGTATCCTCAGCTTTGAG	1	21.8895
	GGAAGCCGATGTGTATCCTCAGCTTTGAG	8	175.116
	GGAAGCCGATGTGTATCCTCAGCTTTGAGA	3	65.6685
	GGAAGCCGATGTGTATCCTCAGCTTTGAGA	22	481.569
	GGAAGCCGATGTGTATCCTCAGCTTTGAGAA	2	43.779
	GGAAGCCGATGTGTATCCTCAGCTTTGAGAA	15	328.343
	GTATCCTCAGCTTTGAGAACTGAAT	1	21.8895
	GTATCCTCAGCTTTGAGAACTGAAT	10	218.895
	GTATCCTCAGCTTTGAGAACTGAATT	10	218.895
	GTATCCTCAGCTTTGAGAACTGAATT	1	21.8895
	GGAAGCCGATGTGTATCCTCAGCTTTGAGAAC	3	65.6685
	GGAAGCCGATGTGTATCCTCAGCTTTGAGAAC	28	612.906
	GTATCCTCAGCTTTGAGAACTGAATTC	12	262.674
	GTATCCTCAGCTTTGAGAACTGAATTCC	14	306.453
	GTATCCTCAGCTTTGAGAACTGAATTCC	3	65.6685
	GTATCCTCAGCTTTGAGAACTGAATTCCA	86	1882.5
	GTATCCTCAGCTTTGAGAACTGAATTCCA	2	43.779
	GTATCCTCAGCTTTGAGAACTGAATTCCAT	18	394.011
	GTATCCTCAGCTTTGAGAACTGAATTCCAT	3	65.6685
	GTATCCTCAGCTTTGAGAACTGAATTCCATG	184	4027.67
	GTATCCTCAGCTTTGAGAACTGAATTCCATG	13	284.564
	GTATCCTCAGCTTTGAGAACTGAATTCCATGG	10	218.895
	GTATCCTCAGCTTTGAGAACTGAATTCCATGG	2	43.779
	GTATCCTCAGCTTTGAGAACTGAATTCCATGGG	28	612.906
	GTATCCTCAGCTTTGAGAACTGAATTCCATGGGT	2	43.779
	GTATCCTCAGCTTTGAGAACTGAATTCCATGGGT	5	109.448
	GTATCCTCAGCTTTGAGAACTGAATTCCATGGGTT	3	65.6685
	GTATCCTCAGCTTTGAGAACTGAATTCCATGGGTTG	1	21.8895
	GTATCCTCAGCTTTGAGAACTGAATTCCATGGGTTG	12	262.674
	GGAAGCCGATGTGTATCCTCAGCTTTGAGAACT	27	591.017
	GTATCCTCAGCTTTGAGAACTGAATTCCATGGGTTGT	13	284.564
	GTATCCTCAGCTTTGAGAACTGAATTCCATGGGTTGTG	1	21.8895
	GTATCCTCAGCTTTGAGAACTGAATTCCATGGGTTGTGT	1	21.8895
	GTATCCTCAGCTTTGAGAACTGAATTCCATGGGTTGTGTC	3	65.6685
	GTATCCTCAGCTTTGAGAACTGAATTCCATGGGTTGTGTCA	1	21.8895
	GTATCCTCAGCTTTGAGAACTGAATTCCATGGGTTGTGTCAGTGTC	1	21.8895
	GGAAGCCGATGTGTATCCTCAGCTTTGAGAACTG	50	1094.48
	GGAAGCCGATGTGTATCCTCAGCTTTGAGAACTGA	2	43.779
	GGAAGCCGATGTGTATCCTCAGCTTTGAGAACTGA	46	1006.92
	GGAAGCCGATGTGTATCCTCAGCTTTGAGAACTGAA	13	284.564
	GGAAGCCGATGTGTATCCTCAGCTTTGAGAACTGAA	28	612.906
	GGAAGCCGATGTGTATCCTCAGCTTTGAGAACTGAAT	2	43.779
	GGAAGCCGATGTGTATCCTCAGCTTTGAGAACTGAAT	172	3764.99
	GGAAGCCGATGTGTATCCTCAGCTTTGAGAACTGAATT	10	218.895
	GGAAGCCGATGTGTATCCTCAGCTTTGAGAACTGAATT	24	525.348
	GGAAGCCGATGTGTATCCTCAGCTTTGAGAACTGAATTC	1	21.8895
	TATCCTCAGCTTTGAGAACTGAATT	4	87.558
	TATCCTCAGCTTTGAGAACTGAATT	2	43.779
	TATCCTCAGCTTTGAGAACTGAATTC	1	21.8895
	TATCCTCAGCTTTGAGAACTGAATTCC	1	21.8895
	TATCCTCAGCTTTGAGAACTGAATTCC	1	21.8895
	TATCCTCAGCTTTGAGAACTGAATTCCA	17	372.122
	TATCCTCAGCTTTGAGAACTGAATTCCA	1	21.8895
	TATCCTCAGCTTTGAGAACTGAATTCCAT	12	262.674
	TATCCTCAGCTTTGAGAACTGAATTCCAT	2	43.779
	TATCCTCAGCTTTGAGAACTGAATTCCATG	131	2867.52
	TATCCTCAGCTTTGAGAACTGAATTCCATG	8	175.116
	TATCCTCAGCTTTGAGAACTGAATTCCATGG	3	65.6685
	TATCCTCAGCTTTGAGAACTGAATTCCATGG	4	87.558
	TATCCTCAGCTTTGAGAACTGAATTCCATGGG	1	21.8895
	TATCCTCAGCTTTGAGAACTGAATTCCATGGG	84	1838.72
	TATCCTCAGCTTTGAGAACTGAATTCCATGGGT	4	87.558
	TATCCTCAGCTTTGAGAACTGAATTCCATGGGT	5	109.448
	TATCCTCAGCTTTGAGAACTGAATTCCATGGGTT	1	21.8895
	TATCCTCAGCTTTGAGAACTGAATTCCATGGGTT	6	131.337
	TATCCTCAGCTTTGAGAACTGAATTCCATGGGTTG	1	21.8895
	TATCCTCAGCTTTGAGAACTGAATTCCATGGGTTG	27	591.017
	TATCCTCAGCTTTGAGAACTGAATTCCATGGGTTGT	1	21.8895
	TATCCTCAGCTTTGAGAACTGAATTCCATGGGTTGT	5	109.448
	TATCCTCAGCTTTGAGAACTGAATTCCATGGGTTGTG	18	394.011
	TATCCTCAGCTTTGAGAACTGAATTCCATGGGTTGTGT	16	350.232
	TATCCTCAGCTTTGAGAACTGAATTCCATGGGTTGTGTC	17	372.122
	GGAAGCCGATGTGTATCCTCAGCTTTGAGAACTGAATTCCATGG	1	21.8895
	GGAAGCCGATGTGTATCCTCAGCTTTGAGAACTGAATTCCATGGGTTG	1	21.8895
	GGAAGCCGATGTGTATCCTCAGCTTTGAGAACTGAATTCCATGGGTTGTGTC	1	21.8895
	GGAAGCCGATGTGTATCCTCAGCTTTGAGAACTGAATTCCATGGGTTGTGTC	1	21.8895
	ATCCTCAGCTTTGAGAACTGAATTCC	2	43.779
	ATCCTCAGCTTTGAGAACTGAATTCC	2	43.779
	ATCCTCAGCTTTGAGAACTGAATTCCA	10	218.895
	ATCCTCAGCTTTGAGAACTGAATTCCA	10	218.895
	ATCCTCAGCTTTGAGAACTGAATTCCAT	3	65.6685
	ATCCTCAGCTTTGAGAACTGAATTCCAT	5	109.448
	ATCCTCAGCTTTGAGAACTGAATTCCATG	60	1313.37
	ATCCTCAGCTTTGAGAACTGAATTCCATG	11	240.785
	ATCCTCAGCTTTGAGAACTGAATTCCATGG	3	65.6685
	ATCCTCAGCTTTGAGAACTGAATTCCATGG	14	306.453
	ATCCTCAGCTTTGAGAACTGAATTCCATGGG	153	3349.09
	ATCCTCAGCTTTGAGAACTGAATTCCATGGGT	2	43.779
	ATCCTCAGCTTTGAGAACTGAATTCCATGGGT	20	437.79
	ATCCTCAGCTTTGAGAACTGAATTCCATGGGTT	32	700.464
	ATCCTCAGCTTTGAGAACTGAATTCCATGGGTTG	57	1247.7
	ATCCTCAGCTTTGAGAACTGAATTCCATGGGTTGT	120	2626.74
	ATCCTCAGCTTTGAGAACTGAATTCCATGGGTTGTG	127	2779.97
	ATCCTCAGCTTTGAGAACTGAATTCCATGGGTTGTGT	231	5056.47
	ATCCTCAGCTTTGAGAACTGAATTCCATGGGTTGTGTC	461	10091.1
	ATCCTCAGCTTTGAGAACTGAATTCCATGGGTTGTGTCA	1	21.8895
	ATCCTCAGCTTTGAGAACTGAATTCCATGGGTTGTGTCA	3	65.6685
	ATCCTCAGCTTTGAGAACTGAATTCCATGGGTTGTGTCAGTG	1	21.8895
	TCCTCAGCTTTGAGAACTGAATTCCA	2	43.779
	TCCTCAGCTTTGAGAACTGAATTCCA	3	65.6685
	TCCTCAGCTTTGAGAACTGAATTCCAT	4	87.558
	TCCTCAGCTTTGAGAACTGAATTCCATG	12	262.674
	TCCTCAGCTTTGAGAACTGAATTCCATG	1	21.8895
	TCCTCAGCTTTGAGAACTGAATTCCATGG	3	65.6685
	TCCTCAGCTTTGAGAACTGAATTCCATGG	1	21.8895
	TCCTCAGCTTTGAGAACTGAATTCCATGGG	1	21.8895
	TCCTCAGCTTTGAGAACTGAATTCCATGGG	22	481.569
	TCCTCAGCTTTGAGAACTGAATTCCATGGGT	8	175.116
	TCCTCAGCTTTGAGAACTGAATTCCATGGGT	5	109.448
	TCCTCAGCTTTGAGAACTGAATTCCATGGGTT	1	21.8895
	TCCTCAGCTTTGAGAACTGAATTCCATGGGTT	3	65.6685
	TCCTCAGCTTTGAGAACTGAATTCCATGGGTTG	5	109.448
	TCCTCAGCTTTGAGAACTGAATTCCATGGGTTGT	1	21.8895
	TCCTCAGCTTTGAGAACTGAATTCCATGGGTTGT	10	218.895
	TCCTCAGCTTTGAGAACTGAATTCCATGGGTTGTG	16	350.232
	TCCTCAGCTTTGAGAACTGAATTCCATGGGTTGTGT	24	525.348
	TCCTCAGCTTTGAGAACTGAATTCCATGGGTTGTGTC	64	1400.93
	TCCTCAGCTTTGAGAACTGAATTCCATGGGTTGTGTCA	2	43.779
	TCCTCAGCTTTGAGAACTGAATTCCATGGGTTGTGTCAG	1	21.8895
	TCCTCAGCTTTGAGAACTGAATTCCATGGGTTGTGTCAGT	1	21.8895
	TCCTCAGCTTTGAGAACTGAATTCCATGGGTTGTGTCAGTGTCAGACCTGTGAAAT	1	21.8895
	CCTCAGCTTTGAGAACTGAATTCCA	8	175.116
	CCTCAGCTTTGAGAACTGAATTCCAT	7	153.227
	CCTCAGCTTTGAGAACTGAATTCCATG	35	766.133
	CCTCAGCTTTGAGAACTGAATTCCATGG	7	153.227
	CCTCAGCTTTGAGAACTGAATTCCATGGG	10	218.895
	CCTCAGCTTTGAGAACTGAATTCCATGGG	13	284.564
	CCTCAGCTTTGAGAACTGAATTCCATGGGT	45	985.028
	CCTCAGCTTTGAGAACTGAATTCCATGGGT	2	43.779
	CCTCAGCTTTGAGAACTGAATTCCATGGGTT	12	262.674
	CCTCAGCTTTGAGAACTGAATTCCATGGGTT	5	109.448
	CCTCAGCTTTGAGAACTGAATTCCATGGGTTG	18	394.011
	CCTCAGCTTTGAGAACTGAATTCCATGGGTTG	6	131.337
	CCTCAGCTTTGAGAACTGAATTCCATGGGTTGT	8	175.116
	CCTCAGCTTTGAGAACTGAATTCCATGGGTTGT	2	43.779
	CCTCAGCTTTGAGAACTGAATTCCATGGGTTGTG	1	21.8895
	CCTCAGCTTTGAGAACTGAATTCCATGGGTTGTG	9	197.006
	CCTCAGCTTTGAGAACTGAATTCCATGGGTTGTGT	2	43.779
	CCTCAGCTTTGAGAACTGAATTCCATGGGTTGTGT	21	459.68
	CCTCAGCTTTGAGAACTGAATTCCATGGGTTGTGTC	8	175.116
	CCTCAGCTTTGAGAACTGAATTCCATGGGTTGTGTC	55	1203.92
	CCTCAGCTTTGAGAACTGAATTCCATGGGTTGTGTCA	11	240.785
	CCTCAGCTTTGAGAACTGAATTCCATGGGTTGTGTCA	1	21.8895
	CCTCAGCTTTGAGAACTGAATTCCATGGGTTGTGTCAGTGTC	1	21.8895
	CTCAGCTTTGAGAACTGAATTCCAT	3	65.6685
	CTCAGCTTTGAGAACTGAATTCCATG	1	21.8895
	CTCAGCTTTGAGAACTGAATTCCATGG	1	21.8895
	CTCAGCTTTGAGAACTGAATTCCATGGG	1	21.8895
	CTCAGCTTTGAGAACTGAATTCCATGGGT	1	21.8895
	CTCAGCTTTGAGAACTGAATTCCATGGGT	2	43.779
	CTCAGCTTTGAGAACTGAATTCCATGGGTT	1	21.8895
	CTCAGCTTTGAGAACTGAATTCCATGGGTTG	1	21.8895
	CTCAGCTTTGAGAACTGAATTCCATGGGTTG	5	109.448
	CTCAGCTTTGAGAACTGAATTCCATGGGTTGT	4	87.558
	CTCAGCTTTGAGAACTGAATTCCATGGGTTGTG	6	131.337
	CTCAGCTTTGAGAACTGAATTCCATGGGTTGTGT	12	262.674
	CTCAGCTTTGAGAACTGAATTCCATGGGTTGTGTC	32	700.464
	CTCAGCTTTGAGAACTGAATTCCATGGGTTGTGTCA	3	65.6685
	CTCAGCTTTGAGAACTGAATTCCATGGGTTGTGTCAG	1	21.8895
	CTCAGCTTTGAGAACTGAATTCCATGGGTTGTGTCAG	1	21.8895
	CTCAGCTTTGAGAACTGAATTCCATGGGTTGTGTCAGTGTCAGACC	1	21.8895
	TCAGCTTTGAGAACTGAATTCCATG	3	65.6685
	TCAGCTTTGAGAACTGAATTCCATGG	1	21.8895
	TCAGCTTTGAGAACTGAATTCCATGGG	3	65.6685
	TCAGCTTTGAGAACTGAATTCCATGGG	9	197.006
	TCAGCTTTGAGAACTGAATTCCATGGGT	10	218.895
	TCAGCTTTGAGAACTGAATTCCATGGGTT	11	240.785
	TCAGCTTTGAGAACTGAATTCCATGGGTT	1	21.8895
	TCAGCTTTGAGAACTGAATTCCATGGGTTG	25	547.238
	TCAGCTTTGAGAACTGAATTCCATGGGTTG	20	437.79
	TCAGCTTTGAGAACTGAATTCCATGGGTTGT	13	284.564
	TCAGCTTTGAGAACTGAATTCCATGGGTTGT	6	131.337
	TCAGCTTTGAGAACTGAATTCCATGGGTTGTG	1	21.8895
	TCAGCTTTGAGAACTGAATTCCATGGGTTGTG	21	459.68
	TCAGCTTTGAGAACTGAATTCCATGGGTTGTGT	6	131.337
	TCAGCTTTGAGAACTGAATTCCATGGGTTGTGT	17	372.122
	TCAGCTTTGAGAACTGAATTCCATGGGTTGTGTC	14	306.453
	TCAGCTTTGAGAACTGAATTCCATGGGTTGTGTC	65	1422.82
	TCAGCTTTGAGAACTGAATTCCATGGGTTGTGTCA	39	853.691
	TCAGCTTTGAGAACTGAATTCCATGGGTTGTGTCA	11	240.785
	TCAGCTTTGAGAACTGAATTCCATGGGTTGTGTCAG	1	21.8895
	TCAGCTTTGAGAACTGAATTCCATGGGTTGTGTCAGT	1	21.8895
	TCAGCTTTGAGAACTGAATTCCATGGGTTGTGTCAGT	14	306.453
	TCAGCTTTGAGAACTGAATTCCATGGGTTGTGTCAGTG	3	65.6685
	TCAGCTTTGAGAACTGAATTCCATGGGTTGTGTCAGTGT	1	21.8895
	TCAGCTTTGAGAACTGAATTCCATGGGTTGTGTCAGTGTCA	1	21.8895
	CAGCTTTGAGAACTGAATTCCATGGG	9	197.006
	CAGCTTTGAGAACTGAATTCCATGGGT	1	21.8895
	CAGCTTTGAGAACTGAATTCCATGGGTT	1	21.8895
	CAGCTTTGAGAACTGAATTCCATGGGTTG	4	87.558
	CAGCTTTGAGAACTGAATTCCATGGGTTG	5	109.448
	CAGCTTTGAGAACTGAATTCCATGGGTTGT	6	131.337
	CAGCTTTGAGAACTGAATTCCATGGGTTGT	8	175.116
	CAGCTTTGAGAACTGAATTCCATGGGTTGTG	7	153.227
	CAGCTTTGAGAACTGAATTCCATGGGTTGTGT	2	43.779
	CAGCTTTGAGAACTGAATTCCATGGGTTGTGT	15	328.343
	CAGCTTTGAGAACTGAATTCCATGGGTTGTGTC	4	87.558
	CAGCTTTGAGAACTGAATTCCATGGGTTGTGTC	44	963.138
	CAGCTTTGAGAACTGAATTCCATGGGTTGTGTCA	11	240.785
	CAGCTTTGAGAACTGAATTCCATGGGTTGTGTCA	2	43.779
	CAGCTTTGAGAACTGAATTCCATGGGTTGTGTCAG	2	43.779
	CAGCTTTGAGAACTGAATTCCATGGGTTGTGTCAGT	1	21.8895
	CAGCTTTGAGAACTGAATTCCATGGGTTGTGTCAGT	5	109.448
	CAGCTTTGAGAACTGAATTCCATGGGTTGTGTCAGTG	3	65.6685
	AGCTTTGAGAACTGAATTCCATGGG	2	43.779
	AGCTTTGAGAACTGAATTCCATGGGTT	1	21.8895
	AGCTTTGAGAACTGAATTCCATGGGTTG	1	21.8895
	AGCTTTGAGAACTGAATTCCATGGGTTG	1	21.8895
	AGCTTTGAGAACTGAATTCCATGGGTTGT	3	65.6685
	AGCTTTGAGAACTGAATTCCATGGGTTGT	2	43.779
	AGCTTTGAGAACTGAATTCCATGGGTTGTG	16	350.232
	AGCTTTGAGAACTGAATTCCATGGGTTGTGT	3	65.6685
	AGCTTTGAGAACTGAATTCCATGGGTTGTGT	43	941.249
	AGCTTTGAGAACTGAATTCCATGGGTTGTGTC	3	65.6685
	AGCTTTGAGAACTGAATTCCATGGGTTGTGTC	203	4443.57
	AGCTTTGAGAACTGAATTCCATGGGTTGTGTCA	6	131.337
	AGCTTTGAGAACTGAATTCCATGGGTTGTGTCA	12	262.674
	AGCTTTGAGAACTGAATTCCATGGGTTGTGTCAG	10	218.895
	AGCTTTGAGAACTGAATTCCATGGGTTGTGTCAGT	1	21.8895
	AGCTTTGAGAACTGAATTCCATGGGTTGTGTCAGT	17	372.122
	AGCTTTGAGAACTGAATTCCATGGGTTGTGTCAGTG	1	21.8895
	AGCTTTGAGAACTGAATTCCATGGGTTGTGTCAGTGT	2	43.779
	AGCTTTGAGAACTGAATTCCATGGGTTGTGTCAGTGTC	5	109.448
	GCTTTGAGAACTGAATTCCATGGGT	6	131.337
	GCTTTGAGAACTGAATTCCATGGGTT	9	197.006
	GCTTTGAGAACTGAATTCCATGGGTTG	21	459.68
	GCTTTGAGAACTGAATTCCATGGGTTG	2	43.779
	GCTTTGAGAACTGAATTCCATGGGTTGT	20	437.79
	GCTTTGAGAACTGAATTCCATGGGTTGT	7	153.227
	GCTTTGAGAACTGAATTCCATGGGTTGTG	5	109.448
	GCTTTGAGAACTGAATTCCATGGGTTGTG	23	503.459
	GCTTTGAGAACTGAATTCCATGGGTTGTGT	16	350.232
	GCTTTGAGAACTGAATTCCATGGGTTGTGT	71	1554.15
	GCTTTGAGAACTGAATTCCATGGGTTGTGTC	157	3436.65
	GCTTTGAGAACTGAATTCCATGGGTTGTGTC	407	8909.03
	GCTTTGAGAACTGAATTCCATGGGTTGTGTCA	322	7048.42
	GCTTTGAGAACTGAATTCCATGGGTTGTGTCA	10	218.895
	GCTTTGAGAACTGAATTCCATGGGTTGTGTCAG	11	240.785
	GCTTTGAGAACTGAATTCCATGGGTTGTGTCAG	6	131.337
	GCTTTGAGAACTGAATTCCATGGGTTGTGTCAGT	3	65.6685
	GCTTTGAGAACTGAATTCCATGGGTTGTGTCAGT	41	897.47
	GCTTTGAGAACTGAATTCCATGGGTTGTGTCAGTG	7	153.227
	GCTTTGAGAACTGAATTCCATGGGTTGTGTCAGTG	11	240.785
	GCTTTGAGAACTGAATTCCATGGGTTGTGTCAGTGT	1	21.8895
	GCTTTGAGAACTGAATTCCATGGGTTGTGTCAGTGT	7	153.227
	GCTTTGAGAACTGAATTCCATGGGTTGTGTCAGTGTC	9	197.006
	GCTTTGAGAACTGAATTCCATGGGTTGTGTCAGTGTC	4	87.558
	GCTTTGAGAACTGAATTCCATGGGTTGTGTCAGTGTCA	10	218.895
	GCTTTGAGAACTGAATTCCATGGGTTGTGTCAGTGTCA	1	21.8895
	GCTTTGAGAACTGAATTCCATGGGTTGTGTCAGTGTCAGACC	1	21.8895
	GCTTTGAGAACTGAATTCCATGGGTTGTGTCAGTGTCAGACCTGTGA	1	21.8895
	GCTTTGAGAACTGAATTCCATGGGTTGTGTCAGTGTCAGACCTGTGAAAT	1	21.8895
	GAAGCCGATGTGTATCCTCAGCTTT	1	21.8895
	GAAGCCGATGTGTATCCTCAGCTTTG	1	21.8895
	GAAGCCGATGTGTATCCTCAGCTTTGA	1	21.8895
	GAAGCCGATGTGTATCCTCAGCTTTGAG	1	21.8895
	GAAGCCGATGTGTATCCTCAGCTTTGAG	1	21.8895
	GAAGCCGATGTGTATCCTCAGCTTTGAGA	3	65.6685
	GAAGCCGATGTGTATCCTCAGCTTTGAGA	4	87.558
	GAAGCCGATGTGTATCCTCAGCTTTGAGAA	2	43.779
	GAAGCCGATGTGTATCCTCAGCTTTGAGAA	2	43.779
	GAAGCCGATGTGTATCCTCAGCTTTGAGAAC	2	43.779
	GAAGCCGATGTGTATCCTCAGCTTTGAGAAC	10	218.895
	CTTTGAGAACTGAATTCCATGGGTT	4	87.558
	CTTTGAGAACTGAATTCCATGGGTTG	12	262.674
	GAAGCCGATGTGTATCCTCAGCTTTGAGAACT	16	350.232
	CTTTGAGAACTGAATTCCATGGGTTGT	11	240.785
	CTTTGAGAACTGAATTCCATGGGTTGTG	6	131.337
	CTTTGAGAACTGAATTCCATGGGTTGTGT	11	240.785
	CTTTGAGAACTGAATTCCATGGGTTGTGT	2	43.779
	CTTTGAGAACTGAATTCCATGGGTTGTGTC	140	3064.53
	CTTTGAGAACTGAATTCCATGGGTTGTGTC	20	437.79
	CTTTGAGAACTGAATTCCATGGGTTGTGTCA	316	6917.08
	CTTTGAGAACTGAATTCCATGGGTTGTGTCAG	8	175.116
	CTTTGAGAACTGAATTCCATGGGTTGTGTCAGT	4	87.558
	CTTTGAGAACTGAATTCCATGGGTTGTGTCAGT	4	87.558
	CTTTGAGAACTGAATTCCATGGGTTGTGTCAGTG	7	153.227
	CTTTGAGAACTGAATTCCATGGGTTGTGTCAGTGT	2	43.779
	CTTTGAGAACTGAATTCCATGGGTTGTGTCAGTGT	1	21.8895
	CTTTGAGAACTGAATTCCATGGGTTGTGTCAGTGTC	24	525.348
	GAAGCCGATGTGTATCCTCAGCTTTGAGAACTG	8	175.116
	CTTTGAGAACTGAATTCCATGGGTTGTGTCAGTGTCA	7	153.227
	CTTTGAGAACTGAATTCCATGGGTTGTGTCAGTGTCA	2	43.779
	GAAGCCGATGTGTATCCTCAGCTTTGAGAACTGA	1	21.8895
	GAAGCCGATGTGTATCCTCAGCTTTGAGAACTGA	18	394.011
	GAAGCCGATGTGTATCCTCAGCTTTGAGAACTGAA	8	175.116
	GAAGCCGATGTGTATCCTCAGCTTTGAGAACTGAA	6	131.337
	GAAGCCGATGTGTATCCTCAGCTTTGAGAACTGAAT	3	65.6685
	GAAGCCGATGTGTATCCTCAGCTTTGAGAACTGAAT	74	1619.82
	GAAGCCGATGTGTATCCTCAGCTTTGAGAACTGAATT	6	131.337
	GAAGCCGATGTGTATCCTCAGCTTTGAGAACTGAATT	17	372.122
	GAAGCCGATGTGTATCCTCAGCTTTGAGAACTGAATTC	3	65.6685
	GAAGCCGATGTGTATCCTCAGCTTTGAGAACTGAATTCCA	2	43.779
	TTTGAGAACTGAATTCCATGGGTTG	2	43.779
	GAAGCCGATGTGTATCCTCAGCTTTGAGAACTGAATTCCATG	1	21.8895
	TTTGAGAACTGAATTCCATGGGTTGT	2	43.779
	TTTGAGAACTGAATTCCATGGGTTGTG	2	43.779
	TTTGAGAACTGAATTCCATGGGTTGTGT	4	87.558
	TTTGAGAACTGAATTCCATGGGTTGTGT	4	87.558
	TTTGAGAACTGAATTCCATGGGTTGTGTC	32	700.464
	TTTGAGAACTGAATTCCATGGGTTGTGTC	28	612.906
	TTTGAGAACTGAATTCCATGGGTTGTGTCA	96	2101.39
	TTTGAGAACTGAATTCCATGGGTTGTGTCA	3	65.6685
	TTTGAGAACTGAATTCCATGGGTTGTGTCAG	3	65.6685
	TTTGAGAACTGAATTCCATGGGTTGTGTCAG	3	65.6685
	TTTGAGAACTGAATTCCATGGGTTGTGTCAGT	1	21.8895
	TTTGAGAACTGAATTCCATGGGTTGTGTCAGT	22	481.569
	TTTGAGAACTGAATTCCATGGGTTGTGTCAGTG	4	87.558
	TTTGAGAACTGAATTCCATGGGTTGTGTCAGTG	9	197.006
	TTTGAGAACTGAATTCCATGGGTTGTGTCAGTGT	1	21.8895
	TTTGAGAACTGAATTCCATGGGTTGTGTCAGTGT	6	131.337
	TTTGAGAACTGAATTCCATGGGTTGTGTCAGTGTC	6	131.337
	TTTGAGAACTGAATTCCATGGGTTGTGTCAGTGTC	20	437.79
	TTTGAGAACTGAATTCCATGGGTTGTGTCAGTGTCA	7	153.227
	TTTGAGAACTGAATTCCATGGGTTGTGTCAGTGTCA	4	87.558
	TTTGAGAACTGAATTCCATGGGTTGTGTCAGTGTCAG	1	21.8895
	TTTGAGAACTGAATTCCATGGGTTGTGTCAGTGTCAGAC	1	21.8895
	TTTGAGAACTGAATTCCATGGGTTGTGTCAGTGTCAGACC	3	65.6685
	TTTGAGAACTGAATTCCATGGGTTGTGTCAGTGTCAGACCTGTG	1	21.8895
	TTTGAGAACTGAATTCCATGGGTTGTGTCAGTGTCAGACCTGTGA	1	21.8895
	TTGAGAACTGAATTCCATGGGTTGT	2	43.779
	TTGAGAACTGAATTCCATGGGTTGTG	1	21.8895
	TTGAGAACTGAATTCCATGGGTTGTGT	1	21.8895
	TTGAGAACTGAATTCCATGGGTTGTGT	4	87.558
	TTGAGAACTGAATTCCATGGGTTGTGTC	3	65.6685
	TTGAGAACTGAATTCCATGGGTTGTGTC	26	569.127
	TTGAGAACTGAATTCCATGGGTTGTGTCA	16	350.232
	TTGAGAACTGAATTCCATGGGTTGTGTCA	2	43.779
	TTGAGAACTGAATTCCATGGGTTGTGTCAG	6	131.337
	TTGAGAACTGAATTCCATGGGTTGTGTCAGT	2	43.779
	TTGAGAACTGAATTCCATGGGTTGTGTCAGT	41	897.47
	TTGAGAACTGAATTCCATGGGTTGTGTCAGTG	3	65.6685
	TTGAGAACTGAATTCCATGGGTTGTGTCAGTG	6	131.337
	TTGAGAACTGAATTCCATGGGTTGTGTCAGTGT	9	197.006
	TTGAGAACTGAATTCCATGGGTTGTGTCAGTGTC	6	131.337
	TTGAGAACTGAATTCCATGGGTTGTGTCAGTGTC	28	612.906
	TTGAGAACTGAATTCCATGGGTTGTGTCAGTGTCA	1	21.8895
	TTGAGAACTGAATTCCATGGGTTGTGTCAGTGTCA	1	21.8895
	TTGAGAACTGAATTCCATGGGTTGTGTCAGTGTCAG	2	43.779
	TTGAGAACTGAATTCCATGGGTTGTGTCAGTGTCAGA	6	131.337
	TTGAGAACTGAATTCCATGGGTTGTGTCAGTGTCAGAC	2	43.779
	TTGAGAACTGAATTCCATGGGTTGTGTCAGTGTCAGACC	9	197.006
	TTGAGAACTGAATTCCATGGGTTGTGTCAGTGTCAGACCTGTG	1	21.8895
	TTGAGAACTGAATTCCATGGGTTGTGTCAGTGTCAGACCTGTGA	2	43.779
	TTGAGAACTGAATTCCATGGGTTGTGTCAGTGTCAGACCTGTGAAATTCAGTTCTT	1	21.8895
	TGAGAACTGAATTCCATGGGTTGTG	2	43.779
	TGAGAACTGAATTCCATGGGTTGTG	2	43.779
	TGAGAACTGAATTCCATGGGTTGTGT	2	43.779
	TGAGAACTGAATTCCATGGGTTGTGT	2	43.779
	TGAGAACTGAATTCCATGGGTTGTGTC	26	569.127
	TGAGAACTGAATTCCATGGGTTGTGTC	7	153.227
	TGAGAACTGAATTCCATGGGTTGTGTCA	102	2232.73
	TGAGAACTGAATTCCATGGGTTGTGTCAG	9	197.006
	TGAGAACTGAATTCCATGGGTTGTGTCAGT	3	65.6685
	TGAGAACTGAATTCCATGGGTTGTGTCAGT	13	284.564
	TGAGAACTGAATTCCATGGGTTGTGTCAGTG	6	131.337
	TGAGAACTGAATTCCATGGGTTGTGTCAGTG	4	87.558
	TGAGAACTGAATTCCATGGGTTGTGTCAGTGT	2	43.779
	TGAGAACTGAATTCCATGGGTTGTGTCAGTGT	1	21.8895
	TGAGAACTGAATTCCATGGGTTGTGTCAGTGTC	26	569.127
	TGAGAACTGAATTCCATGGGTTGTGTCAGTGTC	7	153.227
	TGAGAACTGAATTCCATGGGTTGTGTCAGTGTCA	22	481.569
	TGAGAACTGAATTCCATGGGTTGTGTCAGTGTCAG	2	43.779
	TGAGAACTGAATTCCATGGGTTGTGTCAGTGTCAG	1	21.8895
	TGAGAACTGAATTCCATGGGTTGTGTCAGTGTCAGA	2	43.779
	TGAGAACTGAATTCCATGGGTTGTGTCAGTGTCAGA	7	153.227
	TGAGAACTGAATTCCATGGGTTGTGTCAGTGTCAGAC	8	175.116
	TGAGAACTGAATTCCATGGGTTGTGTCAGTGTCAGACC	13	284.564
	GAGAACTGAATTCCATGGGTTGTGTC	4	87.558
	GAGAACTGAATTCCATGGGTTGTGTC	3	65.6685
	GAGAACTGAATTCCATGGGTTGTGTCA	14	306.453
	GAGAACTGAATTCCATGGGTTGTGTCAG	3	65.6685
	GAGAACTGAATTCCATGGGTTGTGTCAGT	1	21.8895
	GAGAACTGAATTCCATGGGTTGTGTCAGT	3	65.6685
	GAGAACTGAATTCCATGGGTTGTGTCAGTG	2	43.779
	GAGAACTGAATTCCATGGGTTGTGTCAGTGTC	16	350.232
	GAGAACTGAATTCCATGGGTTGTGTCAGTGTC	2	43.779
	GAGAACTGAATTCCATGGGTTGTGTCAGTGTCA	13	284.564
	GAGAACTGAATTCCATGGGTTGTGTCAGTGTCA	1	21.8895
	GAGAACTGAATTCCATGGGTTGTGTCAGTGTCAG	1	21.8895
	GAGAACTGAATTCCATGGGTTGTGTCAGTGTCAGA	1	21.8895
	GAGAACTGAATTCCATGGGTTGTGTCAGTGTCAGA	3	65.6685
	GAGAACTGAATTCCATGGGTTGTGTCAGTGTCAGAC	2	43.779
	GAGAACTGAATTCCATGGGTTGTGTCAGTGTCAGACC	4	87.558
	GAGAACTGAATTCCATGGGTTGTGTCAGTGTCAGACCTGTGAAATTCAGT	1	21.8895
	GAGAACTGAATTCCATGGGTTGTGTCAGTGTCAGACCTGTGAAATTCAGTTCTTC	1	21.8895
	AGAACTGAATTCCATGGGTTGTGTC	18	394.011
	AGAACTGAATTCCATGGGTTGTGTC	2	43.779
	AGAACTGAATTCCATGGGTTGTGTCA	54	1182.03
	AGAACTGAATTCCATGGGTTGTGTCAG	15	328.343
	AGAACTGAATTCCATGGGTTGTGTCAGT	3	65.6685
	AGAACTGAATTCCATGGGTTGTGTCAGT	2	43.779
	AGAACTGAATTCCATGGGTTGTGTCAGTG	15	328.343
	AGAACTGAATTCCATGGGTTGTGTCAGTG	1	21.8895
	AGAACTGAATTCCATGGGTTGTGTCAGTGT	3	65.6685
	AGAACTGAATTCCATGGGTTGTGTCAGTGT	1	21.8895
	AGAACTGAATTCCATGGGTTGTGTCAGTGTC	113	2473.51
	AGAACTGAATTCCATGGGTTGTGTCAGTGTC	5	109.448
	AGAACTGAATTCCATGGGTTGTGTCAGTGTCA	99	2167.06
	AGAACTGAATTCCATGGGTTGTGTCAGTGTCA	1	21.8895
	AGAACTGAATTCCATGGGTTGTGTCAGTGTCAG	8	175.116
	AGAACTGAATTCCATGGGTTGTGTCAGTGTCAG	2	43.779
	AGAACTGAATTCCATGGGTTGTGTCAGTGTCAGA	5	109.448
	AGAACTGAATTCCATGGGTTGTGTCAGTGTCAGA	3	65.6685
	AGAACTGAATTCCATGGGTTGTGTCAGTGTCAGAC	1	21.8895
	AGAACTGAATTCCATGGGTTGTGTCAGTGTCAGAC	4	87.558
	AGAACTGAATTCCATGGGTTGTGTCAGTGTCAGACC	34	744.243
	AGAACTGAATTCCATGGGTTGTGTCAGTGTCAGACCT	1	21.8895
	AGAACTGAATTCCATGGGTTGTGTCAGTGTCAGACCT	3	65.6685
	GAACTGAATTCCATGGGTTGTGTCA	1	21.8895
	GAACTGAATTCCATGGGTTGTGTCAGT	1	21.8895
	GAACTGAATTCCATGGGTTGTGTCAGTG	2	43.779
	GAACTGAATTCCATGGGTTGTGTCAGTGTC	6	131.337
	GAACTGAATTCCATGGGTTGTGTCAGTGTCA	1	21.8895
	GAACTGAATTCCATGGGTTGTGTCAGTGTCAG	1	21.8895
	GAACTGAATTCCATGGGTTGTGTCAGTGTCAGA	2	43.779
	GAACTGAATTCCATGGGTTGTGTCAGTGTCAGACC	3	65.6685
	AACTGAATTCCATGGGTTGTGTCAGTG	1	21.8895
	AACTGAATTCCATGGGTTGTGTCAGTGTCA	3	65.6685
	AACTGAATTCCATGGGTTGTGTCAGTGTCAG	2	43.779
	AACTGAATTCCATGGGTTGTGTCAGTGTCAGA	2	43.779
	AACTGAATTCCATGGGTTGTGTCAGTGTCAGAC	9	197.006
	AACTGAATTCCATGGGTTGTGTCAGTGTCAGACC	76	1663.6
	AACTGAATTCCATGGGTTGTGTCAGTGTCAGACCT	7	153.227
	AACTGAATTCCATGGGTTGTGTCAGTGTCAGACCTG	12	262.674
	AACTGAATTCCATGGGTTGTGTCAGTGTCAGACCTGT	9	197.006
	AACTGAATTCCATGGGTTGTGTCAGTGTCAGACCTGTG	16	350.232
	ACTGAATTCCATGGGTTGTGTCAGT	1	21.8895
	ACTGAATTCCATGGGTTGTGTCAGTG	1	21.8895
	ACTGAATTCCATGGGTTGTGTCAGTGT	1	21.8895
	ACTGAATTCCATGGGTTGTGTCAGTGTC	3	65.6685
	ACTGAATTCCATGGGTTGTGTCAGTGTCA	1	21.8895
	ACTGAATTCCATGGGTTGTGTCAGTGTCAGA	1	21.8895
	ACTGAATTCCATGGGTTGTGTCAGTGTCAGA	2	43.779
	ACTGAATTCCATGGGTTGTGTCAGTGTCAGACC	13	284.564
	ACTGAATTCCATGGGTTGTGTCAGTGTCAGACCTG	4	87.558
	ACTGAATTCCATGGGTTGTGTCAGTGTCAGACCTGT	5	109.448
	ACTGAATTCCATGGGTTGTGTCAGTGTCAGACCTGTG	9	197.006
	ACTGAATTCCATGGGTTGTGTCAGTGTCAGACCTGTGA	1	21.8895
	CTGAATTCCATGGGTTGTGTCAGTG	1	21.8895
	CTGAATTCCATGGGTTGTGTCAGTGTCAG	1	21.8895
	CTGAATTCCATGGGTTGTGTCAGTGTCAGAC	1	21.8895
	CTGAATTCCATGGGTTGTGTCAGTGTCAGACC	8	175.116
	CTGAATTCCATGGGTTGTGTCAGTGTCAGACCT	3	65.6685
	CTGAATTCCATGGGTTGTGTCAGTGTCAGACCTGT	1	21.8895
	CTGAATTCCATGGGTTGTGTCAGTGTCAGACCTGTG	5	109.448
	AAGCCGATGTGTATCCTCAGCTTTG	4	87.558
	AAGCCGATGTGTATCCTCAGCTTTGA	9	197.006
	AAGCCGATGTGTATCCTCAGCTTTGAG	1	21.8895
	AAGCCGATGTGTATCCTCAGCTTTGAG	1	21.8895
	AAGCCGATGTGTATCCTCAGCTTTGAGA	2	43.779
	AAGCCGATGTGTATCCTCAGCTTTGAGA	9	197.006
	AAGCCGATGTGTATCCTCAGCTTTGAGAA	3	65.6685
	AAGCCGATGTGTATCCTCAGCTTTGAGAA	4	87.558
	AAGCCGATGTGTATCCTCAGCTTTGAGAAC	4	87.558
	AAGCCGATGTGTATCCTCAGCTTTGAGAAC	46	1006.92
	AAGCCGATGTGTATCCTCAGCTTTGAGAACT	2	43.779
	AAGCCGATGTGTATCCTCAGCTTTGAGAACT	87	1904.39
	AAGCCGATGTGTATCCTCAGCTTTGAGAACTG	123	2692.41
	TGAATTCCATGGGTTGTGTCAGTGTCAGA	4	87.558
	TGAATTCCATGGGTTGTGTCAGTGTCAGAC	12	262.674
	TGAATTCCATGGGTTGTGTCAGTGTCAGACC	30	656.685
	TGAATTCCATGGGTTGTGTCAGTGTCAGACCT	7	153.227
	TGAATTCCATGGGTTGTGTCAGTGTCAGACCTG	24	525.348
	TGAATTCCATGGGTTGTGTCAGTGTCAGACCTGT	26	569.127
	TGAATTCCATGGGTTGTGTCAGTGTCAGACCTGTG	74	1619.82
	TGAATTCCATGGGTTGTGTCAGTGTCAGACCTGTGA	28	612.906
	AAGCCGATGTGTATCCTCAGCTTTGAGAACTGA	1	21.8895
	AAGCCGATGTGTATCCTCAGCTTTGAGAACTGA	116	2539.18
	TGAATTCCATGGGTTGTGTCAGTGTCAGACCTGTGAA	7	153.227
	TGAATTCCATGGGTTGTGTCAGTGTCAGACCTGTGAAA	1	21.8895
	TGAATTCCATGGGTTGTGTCAGTGTCAGACCTGTGAAATTCAG	1	21.8895
	TGAATTCCATGGGTTGTGTCAGTGTCAGACCTGTGAAATTCAGT	1	21.8895
	AAGCCGATGTGTATCCTCAGCTTTGAGAACTGAA	5	109.448
	AAGCCGATGTGTATCCTCAGCTTTGAGAACTGAA	37	809.912
	AAGCCGATGTGTATCCTCAGCTTTGAGAACTGAAT	3	65.6685
	AAGCCGATGTGTATCCTCAGCTTTGAGAACTGAAT	289	6326.07
	AAGCCGATGTGTATCCTCAGCTTTGAGAACTGAATT	6	131.337
	AAGCCGATGTGTATCCTCAGCTTTGAGAACTGAATT	116	2539.18
	AAGCCGATGTGTATCCTCAGCTTTGAGAACTGAATTC	3	65.6685
	AAGCCGATGTGTATCCTCAGCTTTGAGAACTGAATTC	28	612.906
	AAGCCGATGTGTATCCTCAGCTTTGAGAACTGAATTCC	66	1444.71
	AAGCCGATGTGTATCCTCAGCTTTGAGAACTGAATTCCA	24	525.348
	AAGCCGATGTGTATCCTCAGCTTTGAGAACTGAATTCCAT	3	65.6685
	AAGCCGATGTGTATCCTCAGCTTTGAGAACTGAATTCCATGG	1	21.8895
	GAATTCCATGGGTTGTGTCAGTGTCAG	1	21.8895
	GAATTCCATGGGTTGTGTCAGTGTCAGA	1	21.8895
	GAATTCCATGGGTTGTGTCAGTGTCAGACC	2	43.779
	GAATTCCATGGGTTGTGTCAGTGTCAGACCTG	1	21.8895
	GAATTCCATGGGTTGTGTCAGTGTCAGACCTGT	1	21.8895
	GAATTCCATGGGTTGTGTCAGTGTCAGACCTGTG	10	218.895
	GAATTCCATGGGTTGTGTCAGTGTCAGACCTGTGA	2	43.779
	AAGCCGATGTGTATCCTCAGCTTTGAGAACTGAATTCCATGGG	1	21.8895
	GAATTCCATGGGTTGTGTCAGTGTCAGACCTGTGAAA	1	21.8895
	AAGCCGATGTGTATCCTCAGCTTTGAGAACTGAATTCCATGGGT	1	21.8895
	AATTCCATGGGTTGTGTCAGTGTCAG	1	21.8895
	AATTCCATGGGTTGTGTCAGTGTCAGACC	5	109.448
	AATTCCATGGGTTGTGTCAGTGTCAGACCT	3	65.6685
	AATTCCATGGGTTGTGTCAGTGTCAGACCTG	1	21.8895
	AATTCCATGGGTTGTGTCAGTGTCAGACCTG	5	109.448
	AATTCCATGGGTTGTGTCAGTGTCAGACCTGT	18	394.011
	AATTCCATGGGTTGTGTCAGTGTCAGACCTGTG	74	1619.82
	AATTCCATGGGTTGTGTCAGTGTCAGACCTGTGA	16	350.232
	AATTCCATGGGTTGTGTCAGTGTCAGACCTGTGAA	2	43.779
	AATTCCATGGGTTGTGTCAGTGTCAGACCTGTGAAA	1	21.8895
	AATTCCATGGGTTGTGTCAGTGTCAGACCTGTGAAAT	4	87.558
	AATTCCATGGGTTGTGTCAGTGTCAGACCTGTGAAATT	6	131.337
	AATTCCATGGGTTGTGTCAGTGTCAGACCTGTGAAATTCA	1	21.8895
	ATTCCATGGGTTGTGTCAGTGTCAG	3	65.6685
	ATTCCATGGGTTGTGTCAGTGTCAGA	1	21.8895
	ATTCCATGGGTTGTGTCAGTGTCAGACC	2	43.779
	ATTCCATGGGTTGTGTCAGTGTCAGACCTG	2	43.779
	ATTCCATGGGTTGTGTCAGTGTCAGACCTGT	7	153.227
	ATTCCATGGGTTGTGTCAGTGTCAGACCTGTG	36	788.022
	ATTCCATGGGTTGTGTCAGTGTCAGACCTGTGA	7	153.227
	ATTCCATGGGTTGTGTCAGTGTCAGACCTGTGAAA	1	21.8895
	ATTCCATGGGTTGTGTCAGTGTCAGACCTGTGAAAT	2	43.779
	ATTCCATGGGTTGTGTCAGTGTCAGACCTGTGAAATT	11	240.785
	ATTCCATGGGTTGTGTCAGTGTCAGACCTGTGAAATTC	17	372.122
	TTCCATGGGTTGTGTCAGTGTCAGA	1	21.8895
	TTCCATGGGTTGTGTCAGTGTCAGACC	1	21.8895
	TTCCATGGGTTGTGTCAGTGTCAGACCTGT	1	21.8895
	TTCCATGGGTTGTGTCAGTGTCAGACCTGTG	45	985.028
	TTCCATGGGTTGTGTCAGTGTCAGACCTGTGA	4	87.558
	TTCCATGGGTTGTGTCAGTGTCAGACCTGTGAA	8	175.116
	TTCCATGGGTTGTGTCAGTGTCAGACCTGTGAAA	22	481.569
	TTCCATGGGTTGTGTCAGTGTCAGACCTGTGAAAT	117	2561.07
	TTCCATGGGTTGTGTCAGTGTCAGACCTGTGAAATT	10	218.895
	TTCCATGGGTTGTGTCAGTGTCAGACCTGTGAAATTC	3	65.6685
	TTCCATGGGTTGTGTCAGTGTCAGACCTGTGAAATTCAGTTCTTCAG	1	21.8895
	TCCATGGGTTGTGTCAGTGTCAGACCTGTG	73	1597.93
	TCCATGGGTTGTGTCAGTGTCAGACCTGTGA	3	65.6685
	TCCATGGGTTGTGTCAGTGTCAGACCTGTGAA	26	569.127
	TCCATGGGTTGTGTCAGTGTCAGACCTGTGAAA	1	21.8895
	TCCATGGGTTGTGTCAGTGTCAGACCTGTGAAA	80	1751.16
	TCCATGGGTTGTGTCAGTGTCAGACCTGTGAAAT	430	9412.49
	TCCATGGGTTGTGTCAGTGTCAGACCTGTGAAATTCAGT	1	21.8895
	TCCATGGGTTGTGTCAGTGTCAGACCTGTGAAATTCAGTTCTTCA	1	21.8895
	CCATGGGTTGTGTCAGTGTCAGACCTG	2	43.779
	CCATGGGTTGTGTCAGTGTCAGACCTGT	1	21.8895
	CCATGGGTTGTGTCAGTGTCAGACCTGTG	1	21.8895
	CCATGGGTTGTGTCAGTGTCAGACCTGTG	8	175.116
	CCATGGGTTGTGTCAGTGTCAGACCTGTGA	2	43.779
	CCATGGGTTGTGTCAGTGTCAGACCTGTGAA	39	853.691
	CCATGGGTTGTGTCAGTGTCAGACCTGTGAAA	239	5231.59
	CCATGGGTTGTGTCAGTGTCAGACCTGTGAAAT	35	766.133
	CCATGGGTTGTGTCAGTGTCAGACCTGTGAAATTC	1	21.8895
	CCATGGGTTGTGTCAGTGTCAGACCTGTGAAATTCA	1	21.8895
	CCATGGGTTGTGTCAGTGTCAGACCTGTGAAATTCA	1	21.8895
	CCATGGGTTGTGTCAGTGTCAGACCTGTGAAATTCAGTTCTT	5	109.448
	CCATGGGTTGTGTCAGTGTCAGACCTGTGAAATTCAGTTCTTCAGC	2	43.779
	CCATGGGTTGTGTCAGTGTCAGACCTGTGAAATTCAGTTCTTCAGCTGGG	1	21.8895
	CATGGGTTGTGTCAGTGTCAGACCTGTG	2	43.779
	CATGGGTTGTGTCAGTGTCAGACCTGTGA	1	21.8895
	CATGGGTTGTGTCAGTGTCAGACCTGTGAA	7	153.227
	CATGGGTTGTGTCAGTGTCAGACCTGTGAAA	31	678.575
	CATGGGTTGTGTCAGTGTCAGACCTGTGAAAT	10	218.895
	CATGGGTTGTGTCAGTGTCAGACCTGTGAAATT	1	21.8895
	CATGGGTTGTGTCAGTGTCAGACCTGTGAAATTCA	1	21.8895
	CATGGGTTGTGTCAGTGTCAGACCTGTGAAATTCAGTTCTT	1	21.8895
	CATGGGTTGTGTCAGTGTCAGACCTGTGAAATTCAGTTCTTCAGCTGGG	1	21.8895
	ATGGGTTGTGTCAGTGTCAGACCTGT	1	21.8895
	ATGGGTTGTGTCAGTGTCAGACCTGTG	1	21.8895
	ATGGGTTGTGTCAGTGTCAGACCTGTG	1	21.8895
	ATGGGTTGTGTCAGTGTCAGACCTGTGAA	3	65.6685
	ATGGGTTGTGTCAGTGTCAGACCTGTGAAA	5	109.448
	ATGGGTTGTGTCAGTGTCAGACCTGTGAAAT	9	197.006
	ATGGGTTGTGTCAGTGTCAGACCTGTGAAATT	4	87.558
	ATGGGTTGTGTCAGTGTCAGACCTGTGAAATTC	8	175.116
	ATGGGTTGTGTCAGTGTCAGACCTGTGAAATTCA	4	87.558
	ATGGGTTGTGTCAGTGTCAGACCTGTGAAATTCAG	3	65.6685
	ATGGGTTGTGTCAGTGTCAGACCTGTGAAATTCAGT	14	306.453
	ATGGGTTGTGTCAGTGTCAGACCTGTGAAATTCAGTT	1	21.8895
	ATGGGTTGTGTCAGTGTCAGACCTGTGAAATTCAGTTC	1	21.8895
	ATGGGTTGTGTCAGTGTCAGACCTGTGAAATTCAGTTCT	1	21.8895
	ATGGGTTGTGTCAGTGTCAGACCTGTGAAATTCAGTTCTT	1	21.8895
	ATGGGTTGTGTCAGTGTCAGACCTGTGAAATTCAGTTCTTCAG	2	43.779
	ATGGGTTGTGTCAGTGTCAGACCTGTGAAATTCAGTTCTTCAGC	1	21.8895
	ATGGGTTGTGTCAGTGTCAGACCTGTGAAATTCAGTTCTTCAGCTGGG	1	21.8895
	TGGGTTGTGTCAGTGTCAGACCTGTGA	1	21.8895
	TGGGTTGTGTCAGTGTCAGACCTGTGAA	1	21.8895
	TGGGTTGTGTCAGTGTCAGACCTGTGAAA	5	109.448
	TGGGTTGTGTCAGTGTCAGACCTGTGAAAT	1	21.8895
	TGGGTTGTGTCAGTGTCAGACCTGTGAAAT	5	109.448
	TGGGTTGTGTCAGTGTCAGACCTGTGAAATT	1	21.8895
	TGGGTTGTGTCAGTGTCAGACCTGTGAAATT	4	87.558
	TGGGTTGTGTCAGTGTCAGACCTGTGAAATTC	14	306.453
	TGGGTTGTGTCAGTGTCAGACCTGTGAAATTCA	2	43.779
	TGGGTTGTGTCAGTGTCAGACCTGTGAAATTCA	3	65.6685
	TGGGTTGTGTCAGTGTCAGACCTGTGAAATTCAG	2	43.779
	TGGGTTGTGTCAGTGTCAGACCTGTGAAATTCAG	3	65.6685
	TGGGTTGTGTCAGTGTCAGACCTGTGAAATTCAGT	1	21.8895
	TGGGTTGTGTCAGTGTCAGACCTGTGAAATTCAGT	22	481.569
	TGGGTTGTGTCAGTGTCAGACCTGTGAAATTCAGTT	3	65.6685
	TGGGTTGTGTCAGTGTCAGACCTGTGAAATTCAGTTC	1	21.8895
	TGGGTTGTGTCAGTGTCAGACCTGTGAAATTCAGTTCT	8	175.116
	TGGGTTGTGTCAGTGTCAGACCTGTGAAATTCAGTTCTT	1	21.8895
	TGGGTTGTGTCAGTGTCAGACCTGTGAAATTCAGTTCTT	3	65.6685
	TGGGTTGTGTCAGTGTCAGACCTGTGAAATTCAGTTCTTC	1	21.8895
	TGGGTTGTGTCAGTGTCAGACCTGTGAAATTCAGTTCTTCAG	1	21.8895
	AGCCGATGTGTATCCTCAGCTTTGA	1	21.8895
	AGCCGATGTGTATCCTCAGCTTTGA	3	65.6685
	AGCCGATGTGTATCCTCAGCTTTGAG	3	65.6685
	AGCCGATGTGTATCCTCAGCTTTGAG	6	131.337
	AGCCGATGTGTATCCTCAGCTTTGAGA	4	87.558
	AGCCGATGTGTATCCTCAGCTTTGAGA	10	218.895
	AGCCGATGTGTATCCTCAGCTTTGAGAA	9	197.006
	AGCCGATGTGTATCCTCAGCTTTGAGAA	14	306.453
	AGCCGATGTGTATCCTCAGCTTTGAGAAC	3	65.6685
	AGCCGATGTGTATCCTCAGCTTTGAGAAC	28	612.906
	AGCCGATGTGTATCCTCAGCTTTGAGAACT	22	481.569
	AGCCGATGTGTATCCTCAGCTTTGAGAACTG	2	43.779
	AGCCGATGTGTATCCTCAGCTTTGAGAACTG	52	1138.25
	GGGTTGTGTCAGTGTCAGACCTGTGA	1	21.8895
	AGCCGATGTGTATCCTCAGCTTTGAGAACTGA	56	1225.81
	GGGTTGTGTCAGTGTCAGACCTGTGAAAT	3	65.6685
	GGGTTGTGTCAGTGTCAGACCTGTGAAATT	1	21.8895
	GGGTTGTGTCAGTGTCAGACCTGTGAAATTC	1	21.8895
	GGGTTGTGTCAGTGTCAGACCTGTGAAATTCA	1	21.8895
	GGGTTGTGTCAGTGTCAGACCTGTGAAATTCAGT	3	65.6685
	GGGTTGTGTCAGTGTCAGACCTGTGAAATTCAGTT	3	65.6685
	GGGTTGTGTCAGTGTCAGACCTGTGAAATTCAGTTC	1	21.8895
	AGCCGATGTGTATCCTCAGCTTTGAGAACTGAA	6	131.337
	AGCCGATGTGTATCCTCAGCTTTGAGAACTGAA	24	525.348
	GGGTTGTGTCAGTGTCAGACCTGTGAAATTCAGTTCT	3	65.6685
	GGGTTGTGTCAGTGTCAGACCTGTGAAATTCAGTTCTTCAGCTGGG	1	21.8895
	AGCCGATGTGTATCCTCAGCTTTGAGAACTGAAT	1	21.8895
	AGCCGATGTGTATCCTCAGCTTTGAGAACTGAAT	226	4947.03
	AGCCGATGTGTATCCTCAGCTTTGAGAACTGAATT	13	284.564
	AGCCGATGTGTATCCTCAGCTTTGAGAACTGAATT	62	1357.15
	AGCCGATGTGTATCCTCAGCTTTGAGAACTGAATTC	3	65.6685
	AGCCGATGTGTATCCTCAGCTTTGAGAACTGAATTC	6	131.337
	AGCCGATGTGTATCCTCAGCTTTGAGAACTGAATTCC	30	656.685
	AGCCGATGTGTATCCTCAGCTTTGAGAACTGAATTCCA	2	43.779
	AGCCGATGTGTATCCTCAGCTTTGAGAACTGAATTCCA	11	240.785
	AGCCGATGTGTATCCTCAGCTTTGAGAACTGAATTCCAT	2	43.779
	AGCCGATGTGTATCCTCAGCTTTGAGAACTGAATTCCATGGG	1	21.8895
	GGTTGTGTCAGTGTCAGACCTGTGAAA	1	21.8895
	GGTTGTGTCAGTGTCAGACCTGTGAAAT	2	43.779
	GGTTGTGTCAGTGTCAGACCTGTGAAAT	3	65.6685
	GGTTGTGTCAGTGTCAGACCTGTGAAATT	1	21.8895
	GGTTGTGTCAGTGTCAGACCTGTGAAATTCA	4	87.558
	GGTTGTGTCAGTGTCAGACCTGTGAAATTCAG	3	65.6685
	GGTTGTGTCAGTGTCAGACCTGTGAAATTCAGT	7	153.227
	GGTTGTGTCAGTGTCAGACCTGTGAAATTCAGT	1	21.8895
	GGTTGTGTCAGTGTCAGACCTGTGAAATTCAGTT	8	175.116
	GGTTGTGTCAGTGTCAGACCTGTGAAATTCAGTT	1	21.8895
	GGTTGTGTCAGTGTCAGACCTGTGAAATTCAGTTCT	1	21.8895
	GGTTGTGTCAGTGTCAGACCTGTGAAATTCAGTTCT	1	21.8895
	GGTTGTGTCAGTGTCAGACCTGTGAAATTCAGTTCTT	1	21.8895
	GGTTGTGTCAGTGTCAGACCTGTGAAATTCAGTTCTT	1	21.8895
	GGTTGTGTCAGTGTCAGACCTGTGAAATTCAGTTCTTC	1	21.8895
	GTTGTGTCAGTGTCAGACCTGTGAA	1	21.8895
	GTTGTGTCAGTGTCAGACCTGTGAA	1	21.8895
	GTTGTGTCAGTGTCAGACCTGTGAAA	2	43.779
	GTTGTGTCAGTGTCAGACCTGTGAAAT	5	109.448
	GTTGTGTCAGTGTCAGACCTGTGAAAT	1	21.8895
	GTTGTGTCAGTGTCAGACCTGTGAAATT	7	153.227
	GTTGTGTCAGTGTCAGACCTGTGAAATTC	1	21.8895
	GTTGTGTCAGTGTCAGACCTGTGAAATTCA	10	218.895
	GTTGTGTCAGTGTCAGACCTGTGAAATTCAG	21	459.68
	GTTGTGTCAGTGTCAGACCTGTGAAATTCAGT	12	262.674
	GTTGTGTCAGTGTCAGACCTGTGAAATTCAGTT	35	766.133
	GTTGTGTCAGTGTCAGACCTGTGAAATTCAGTTC	1	21.8895
	GTTGTGTCAGTGTCAGACCTGTGAAATTCAGTTCT	6	131.337
	GTTGTGTCAGTGTCAGACCTGTGAAATTCAGTTCTT	3	65.6685
	GTTGTGTCAGTGTCAGACCTGTGAAATTCAGTTCTTC	3	65.6685
	GTTGTGTCAGTGTCAGACCTGTGAAATTCAGTTCTTCA	2	43.779
	GTTGTGTCAGTGTCAGACCTGTGAAATTCAGTTCTTCAG	1	21.8895
	GTTGTGTCAGTGTCAGACCTGTGAAATTCAGTTCTTCAGCT	1	21.8895
	TTGTGTCAGTGTCAGACCTGTGAAA	2	43.779
	TTGTGTCAGTGTCAGACCTGTGAAA	2	43.779
	TTGTGTCAGTGTCAGACCTGTGAAAT	6	131.337
	TTGTGTCAGTGTCAGACCTGTGAAATT	2	43.779
	TTGTGTCAGTGTCAGACCTGTGAAATT	1	21.8895
	TTGTGTCAGTGTCAGACCTGTGAAATTCA	9	197.006
	TTGTGTCAGTGTCAGACCTGTGAAATTCAG	13	284.564
	TTGTGTCAGTGTCAGACCTGTGAAATTCAGT	8	175.116
	TTGTGTCAGTGTCAGACCTGTGAAATTCAGT	8	175.116
	TTGTGTCAGTGTCAGACCTGTGAAATTCAGTT	38	831.801
	TTGTGTCAGTGTCAGACCTGTGAAATTCAGTTC	2	43.779
	TTGTGTCAGTGTCAGACCTGTGAAATTCAGTTC	5	109.448
	TTGTGTCAGTGTCAGACCTGTGAAATTCAGTTCT	7	153.227
	TTGTGTCAGTGTCAGACCTGTGAAATTCAGTTCT	41	897.47
	TTGTGTCAGTGTCAGACCTGTGAAATTCAGTTCTT	9	197.006
	TTGTGTCAGTGTCAGACCTGTGAAATTCAGTTCTT	7	153.227
	TTGTGTCAGTGTCAGACCTGTGAAATTCAGTTCTTC	42	919.359
	TTGTGTCAGTGTCAGACCTGTGAAATTCAGTTCTTCA	8	175.116
	TTGTGTCAGTGTCAGACCTGTGAAATTCAGTTCTTCA	12	262.674
	TTGTGTCAGTGTCAGACCTGTGAAATTCAGTTCTTCAG	1	21.8895
	TTGTGTCAGTGTCAGACCTGTGAAATTCAGTTCTTCAG	6	131.337
	TTGTGTCAGTGTCAGACCTGTGAAATTCAGTTCTTCAGC	10	218.895
	TTGTGTCAGTGTCAGACCTGTGAAATTCAGTTCTTCAGCTG	1	21.8895
	TTGTGTCAGTGTCAGACCTGTGAAATTCAGTTCTTCAGCTGGGATATCTCTG	1	21.8895
	TGTGTCAGTGTCAGACCTGTGAAAT	9	197.006
	TGTGTCAGTGTCAGACCTGTGAAAT	1	21.8895
	TGTGTCAGTGTCAGACCTGTGAAATT	5	109.448
	TGTGTCAGTGTCAGACCTGTGAAATTC	4	87.558
	TGTGTCAGTGTCAGACCTGTGAAATTCA	27	591.017
	TGTGTCAGTGTCAGACCTGTGAAATTCAG	62	1357.15
	TGTGTCAGTGTCAGACCTGTGAAATTCAGT	44	963.138
	TGTGTCAGTGTCAGACCTGTGAAATTCAGTT	147	3217.76
	TGTGTCAGTGTCAGACCTGTGAAATTCAGTTC	6	131.337
	TGTGTCAGTGTCAGACCTGTGAAATTCAGTTCT	49	1072.59
	TGTGTCAGTGTCAGACCTGTGAAATTCAGTTCT	14	306.453
	TGTGTCAGTGTCAGACCTGTGAAATTCAGTTCTT	66	1444.71
	TGTGTCAGTGTCAGACCTGTGAAATTCAGTTCTT	2	43.779
	TGTGTCAGTGTCAGACCTGTGAAATTCAGTTCTTC	8	175.116
	TGTGTCAGTGTCAGACCTGTGAAATTCAGTTCTTC	10	218.895
	TGTGTCAGTGTCAGACCTGTGAAATTCAGTTCTTCA	83	1816.83
	TGTGTCAGTGTCAGACCTGTGAAATTCAGTTCTTCA	8	175.116
	TGTGTCAGTGTCAGACCTGTGAAATTCAGTTCTTCAG	2	43.779
	TGTGTCAGTGTCAGACCTGTGAAATTCAGTTCTTCAG	2	43.779
	TGTGTCAGTGTCAGACCTGTGAAATTCAGTTCTTCAGC	9	197.006
	TGTGTCAGTGTCAGACCTGTGAAATTCAGTTCTTCAGCTG	2	43.779
	GTGTCAGTGTCAGACCTGTGAAATT	1	21.8895
	GTGTCAGTGTCAGACCTGTGAAATTC	2	43.779
	GTGTCAGTGTCAGACCTGTGAAATTC	1	21.8895
	GTGTCAGTGTCAGACCTGTGAAATTCA	2	43.779
	GTGTCAGTGTCAGACCTGTGAAATTCAG	5	109.448
	GTGTCAGTGTCAGACCTGTGAAATTCAGT	7	153.227
	GTGTCAGTGTCAGACCTGTGAAATTCAGTT	15	328.343
	GTGTCAGTGTCAGACCTGTGAAATTCAGTTC	1	21.8895
	GTGTCAGTGTCAGACCTGTGAAATTCAGTTC	1	21.8895
	GTGTCAGTGTCAGACCTGTGAAATTCAGTTCT	12	262.674
	GTGTCAGTGTCAGACCTGTGAAATTCAGTTCT	4	87.558
	GTGTCAGTGTCAGACCTGTGAAATTCAGTTCTT	7	153.227
	GTGTCAGTGTCAGACCTGTGAAATTCAGTTCTT	2	43.779
	GTGTCAGTGTCAGACCTGTGAAATTCAGTTCTTC	6	131.337
	GTGTCAGTGTCAGACCTGTGAAATTCAGTTCTTCA	10	218.895
	GTGTCAGTGTCAGACCTGTGAAATTCAGTTCTTCA	2	43.779
	GTGTCAGTGTCAGACCTGTGAAATTCAGTTCTTCAG	6	131.337
	GTGTCAGTGTCAGACCTGTGAAATTCAGTTCTTCAGC	1	21.8895
	GTGTCAGTGTCAGACCTGTGAAATTCAGTTCTTCAGC	7	153.227
	GTGTCAGTGTCAGACCTGTGAAATTCAGTTCTTCAGCT	1	21.8895
	GTGTCAGTGTCAGACCTGTGAAATTCAGTTCTTCAGCTG	1	21.8895
	TGTCAGTGTCAGACCTGTGAAATTCAGTTCTTCAGCTGGGATATCTCTGTCATC	1	21.8895
	TGTCAGTGTCAGACCTGTGAAATTC	4	87.558
	TGTCAGTGTCAGACCTGTGAAATTCA	4	87.558
	TGTCAGTGTCAGACCTGTGAAATTCAG	19	415.901
	TGTCAGTGTCAGACCTGTGAAATTCAGT	8	175.116
	TGTCAGTGTCAGACCTGTGAAATTCAGTT	66	1444.71
	TGTCAGTGTCAGACCTGTGAAATTCAGTTC	4	87.558
	TGTCAGTGTCAGACCTGTGAAATTCAGTTCT	47	1028.81
	TGTCAGTGTCAGACCTGTGAAATTCAGTTCT	7	153.227
	TGTCAGTGTCAGACCTGTGAAATTCAGTTCTT	29	634.796
	TGTCAGTGTCAGACCTGTGAAATTCAGTTCTTC	3	65.6685
	TGTCAGTGTCAGACCTGTGAAATTCAGTTCTTC	5	109.448
	TGTCAGTGTCAGACCTGTGAAATTCAGTTCTTCA	70	1532.27
	TGTCAGTGTCAGACCTGTGAAATTCAGTTCTTCA	3	65.6685
	TGTCAGTGTCAGACCTGTGAAATTCAGTTCTTCAG	3	65.6685
	TGTCAGTGTCAGACCTGTGAAATTCAGTTCTTCAG	4	87.558
	TGTCAGTGTCAGACCTGTGAAATTCAGTTCTTCAGC	8	175.116
	TGTCAGTGTCAGACCTGTGAAATTCAGTTCTTCAGCT	4	87.558
	TGTCAGTGTCAGACCTGTGAAATTCAGTTCTTCAGCT	2	43.779
	TGTCAGTGTCAGACCTGTGAAATTCAGTTCTTCAGCTG	12	262.674
	TGTCAGTGTCAGACCTGTGAAATTCAGTTCTTCAGCTG	4	87.558
	TGTCAGTGTCAGACCTGTGAAATTCAGTTCTTCAGCTGGGATA	1	21.8895
	GTCAGTGTCAGACCTGTGAAATTCAG	6	131.337
	GTCAGTGTCAGACCTGTGAAATTCAGT	1	21.8895
	GTCAGTGTCAGACCTGTGAAATTCAGTT	10	218.895
	GTCAGTGTCAGACCTGTGAAATTCAGTTC	2	43.779
	GTCAGTGTCAGACCTGTGAAATTCAGTTCT	11	240.785
	GTCAGTGTCAGACCTGTGAAATTCAGTTCT	5	109.448
	GTCAGTGTCAGACCTGTGAAATTCAGTTCTT	19	415.901
	GTCAGTGTCAGACCTGTGAAATTCAGTTCTT	3	65.6685
	GTCAGTGTCAGACCTGTGAAATTCAGTTCTTC	5	109.448
	GTCAGTGTCAGACCTGTGAAATTCAGTTCTTC	5	109.448
	GTCAGTGTCAGACCTGTGAAATTCAGTTCTTCA	30	656.685
	GTCAGTGTCAGACCTGTGAAATTCAGTTCTTCA	20	437.79
	GTCAGTGTCAGACCTGTGAAATTCAGTTCTTCAG	5	109.448
	GTCAGTGTCAGACCTGTGAAATTCAGTTCTTCAG	48	1050.7
	GTCAGTGTCAGACCTGTGAAATTCAGTTCTTCAGC	2	43.779
	GTCAGTGTCAGACCTGTGAAATTCAGTTCTTCAGC	18	394.011
	GTCAGTGTCAGACCTGTGAAATTCAGTTCTTCAGCT	1	21.8895
	GTCAGTGTCAGACCTGTGAAATTCAGTTCTTCAGCT	2	43.779
	GTCAGTGTCAGACCTGTGAAATTCAGTTCTTCAGCTG	9	197.006
	GTCAGTGTCAGACCTGTGAAATTCAGTTCTTCAGCTG	15	328.343
	GTCAGTGTCAGACCTGTGAAATTCAGTTCTTCAGCTGGGAT	1	21.8895
	TCAGTGTCAGACCTGTGAAATTCAG	2	43.779
	TCAGTGTCAGACCTGTGAAATTCAGT	1	21.8895
	TCAGTGTCAGACCTGTGAAATTCAGT	1	21.8895
	TCAGTGTCAGACCTGTGAAATTCAGTT	4	87.558
	TCAGTGTCAGACCTGTGAAATTCAGTTCT	13	284.564
	TCAGTGTCAGACCTGTGAAATTCAGTTCT	2	43.779
	TCAGTGTCAGACCTGTGAAATTCAGTTCTT	17	372.122
	TCAGTGTCAGACCTGTGAAATTCAGTTCTT	5	109.448
	TCAGTGTCAGACCTGTGAAATTCAGTTCTTC	9	197.006
	TCAGTGTCAGACCTGTGAAATTCAGTTCTTCA	33	722.354
	TCAGTGTCAGACCTGTGAAATTCAGTTCTTCA	9	197.006
	TCAGTGTCAGACCTGTGAAATTCAGTTCTTCAG	8	175.116
	TCAGTGTCAGACCTGTGAAATTCAGTTCTTCAG	10	218.895
	TCAGTGTCAGACCTGTGAAATTCAGTTCTTCAGC	1	21.8895
	TCAGTGTCAGACCTGTGAAATTCAGTTCTTCAGC	40	875.58
	TCAGTGTCAGACCTGTGAAATTCAGTTCTTCAGCT	5	109.448
	TCAGTGTCAGACCTGTGAAATTCAGTTCTTCAGCT	8	175.116
	TCAGTGTCAGACCTGTGAAATTCAGTTCTTCAGCTG	15	328.343
	TCAGTGTCAGACCTGTGAAATTCAGTTCTTCAGCTG	11	240.785
	TCAGTGTCAGACCTGTGAAATTCAGTTCTTCAGCTGG	3	65.6685
	TCAGTGTCAGACCTGTGAAATTCAGTTCTTCAGCTGGG	34	744.243
	TCAGTGTCAGACCTGTGAAATTCAGTTCTTCAGCTGGGA	2	43.779
	TCAGTGTCAGACCTGTGAAATTCAGTTCTTCAGCTGGGATA	1	21.8895
	TCAGTGTCAGACCTGTGAAATTCAGTTCTTCAGCTGGGATATCTC	1	21.8895
	CAGTGTCAGACCTGTGAAATTCAGT	1	21.8895
	CAGTGTCAGACCTGTGAAATTCAGTT	1	21.8895
	CAGTGTCAGACCTGTGAAATTCAGTTC	1	21.8895
	CAGTGTCAGACCTGTGAAATTCAGTTCT	1	21.8895
	CAGTGTCAGACCTGTGAAATTCAGTTCTT	7	153.227
	CAGTGTCAGACCTGTGAAATTCAGTTCTT	7	153.227
	CAGTGTCAGACCTGTGAAATTCAGTTCTTC	12	262.674
	CAGTGTCAGACCTGTGAAATTCAGTTCTTCA	16	350.232
	CAGTGTCAGACCTGTGAAATTCAGTTCTTCA	37	809.912
	CAGTGTCAGACCTGTGAAATTCAGTTCTTCAG	1	21.8895
	CAGTGTCAGACCTGTGAAATTCAGTTCTTCAG	111	2429.73
	CAGTGTCAGACCTGTGAAATTCAGTTCTTCAGC	1	21.8895
	CAGTGTCAGACCTGTGAAATTCAGTTCTTCAGC	80	1751.16
	CAGTGTCAGACCTGTGAAATTCAGTTCTTCAGCT	11	240.785
	CAGTGTCAGACCTGTGAAATTCAGTTCTTCAGCTG	10	218.895
	CAGTGTCAGACCTGTGAAATTCAGTTCTTCAGCTG	22	481.569
	CAGTGTCAGACCTGTGAAATTCAGTTCTTCAGCTGG	10	218.895
	CAGTGTCAGACCTGTGAAATTCAGTTCTTCAGCTGGG	81	1773.05
	CAGTGTCAGACCTGTGAAATTCAGTTCTTCAGCTGGGA	2	43.779
	CAGTGTCAGACCTGTGAAATTCAGTTCTTCAGCTGGGATATC	1	21.8895
	GCCGATGTGTATCCTCAGCTTTGAG	2	43.779
	AGTGTCAGACCTGTGAAATTCAGTTCTTCAGCTGGGATATCTCTGTCATC	2	43.779
	AGTGTCAGACCTGTGAAATTCAGTTCTTCAGCTGGGATATCTCTGTCATCG	2	43.779
	GCCGATGTGTATCCTCAGCTTTGAGA	9	197.006
	GCCGATGTGTATCCTCAGCTTTGAGA	2	43.779
	GCCGATGTGTATCCTCAGCTTTGAGAA	29	634.796
	GCCGATGTGTATCCTCAGCTTTGAGAA	5	109.448
	GCCGATGTGTATCCTCAGCTTTGAGAAC	25	547.238
	GCCGATGTGTATCCTCAGCTTTGAGAAC	12	262.674
	GCCGATGTGTATCCTCAGCTTTGAGAACT	14	306.453
	GCCGATGTGTATCCTCAGCTTTGAGAACT	8	175.116
	GCCGATGTGTATCCTCAGCTTTGAGAACTG	9	197.006
	GCCGATGTGTATCCTCAGCTTTGAGAACTG	12	262.674
	GCCGATGTGTATCCTCAGCTTTGAGAACTGA	11	240.785
	GCCGATGTGTATCCTCAGCTTTGAGAACTGA	20	437.79
	GCCGATGTGTATCCTCAGCTTTGAGAACTGAA	55	1203.92
	GCCGATGTGTATCCTCAGCTTTGAGAACTGAA	12	262.674
	AGTGTCAGACCTGTGAAATTCAGTTCT	1	21.8895
	AGTGTCAGACCTGTGAAATTCAGTTCTT	1	21.8895
	AGTGTCAGACCTGTGAAATTCAGTTCTT	80	1751.16
	AGTGTCAGACCTGTGAAATTCAGTTCTTC	2	43.779
	AGTGTCAGACCTGTGAAATTCAGTTCTTC	7	153.227
	AGTGTCAGACCTGTGAAATTCAGTTCTTCA	22	481.569
	AGTGTCAGACCTGTGAAATTCAGTTCTTCA	51	1116.36
	AGTGTCAGACCTGTGAAATTCAGTTCTTCAG	2	43.779
	AGTGTCAGACCTGTGAAATTCAGTTCTTCAG	134	2933.19
	AGTGTCAGACCTGTGAAATTCAGTTCTTCAGC	1	21.8895
	AGTGTCAGACCTGTGAAATTCAGTTCTTCAGC	134	2933.19
	AGTGTCAGACCTGTGAAATTCAGTTCTTCAGCT	2	43.779
	AGTGTCAGACCTGTGAAATTCAGTTCTTCAGCT	18	394.011
	AGTGTCAGACCTGTGAAATTCAGTTCTTCAGCTG	15	328.343
	AGTGTCAGACCTGTGAAATTCAGTTCTTCAGCTG	86	1882.5
	AGTGTCAGACCTGTGAAATTCAGTTCTTCAGCTGG	1	21.8895
	AGTGTCAGACCTGTGAAATTCAGTTCTTCAGCTGG	72	1576.04
	AGTGTCAGACCTGTGAAATTCAGTTCTTCAGCTGGG	260	5691.27
	GCCGATGTGTATCCTCAGCTTTGAGAACTGAAT	6	131.337
	GCCGATGTGTATCCTCAGCTTTGAGAACTGAAT	109	2385.96
	AGTGTCAGACCTGTGAAATTCAGTTCTTCAGCTGGGA	56	1225.81
	AGTGTCAGACCTGTGAAATTCAGTTCTTCAGCTGGGAT	7	153.227
	AGTGTCAGACCTGTGAAATTCAGTTCTTCAGCTGGGATA	1	21.8895
	AGTGTCAGACCTGTGAAATTCAGTTCTTCAGCTGGGATA	1	21.8895
	GCCGATGTGTATCCTCAGCTTTGAGAACTGAATT	75	1641.71
	GCCGATGTGTATCCTCAGCTTTGAGAACTGAATT	36	788.022
	GCCGATGTGTATCCTCAGCTTTGAGAACTGAATTC	43	941.249
	GTGTCAGACCTGTGAAATTCAGTTCTTCAGCTGGGATATCTCTGTC	2	43.779
	GTGTCAGACCTGTGAAATTCAGTTCTTCAGCTGGGATATCTCTGTCAT	1	21.8895
	GTGTCAGACCTGTGAAATTCAGTTCTTCAGCTGGGATATCTCTGTCATC	5	109.448
	GTGTCAGACCTGTGAAATTCAGTTCTTCAGCTGGGATATCTCTGTCATCG	2	43.779
	GCCGATGTGTATCCTCAGCTTTGAGAACTGAATTCC	1	21.8895
	GCCGATGTGTATCCTCAGCTTTGAGAACTGAATTCC	15	328.343
	GCCGATGTGTATCCTCAGCTTTGAGAACTGAATTCCA	9	197.006
	GCCGATGTGTATCCTCAGCTTTGAGAACTGAATTCCA	14	306.453
	GCCGATGTGTATCCTCAGCTTTGAGAACTGAATTCCAT	1	21.8895
	GCCGATGTGTATCCTCAGCTTTGAGAACTGAATTCCATG	2	43.779
	GCCGATGTGTATCCTCAGCTTTGAGAACTGAATTCCATG	1	21.8895
	GTGTCAGACCTGTGAAATTCAGTTCTT	1	21.8895
	GTGTCAGACCTGTGAAATTCAGTTCTT	167	3655.55
	GTGTCAGACCTGTGAAATTCAGTTCTTC	12	262.674
	GTGTCAGACCTGTGAAATTCAGTTCTTCA	1	21.8895
	GTGTCAGACCTGTGAAATTCAGTTCTTCA	55	1203.92
	GTGTCAGACCTGTGAAATTCAGTTCTTCAG	1	21.8895
	GTGTCAGACCTGTGAAATTCAGTTCTTCAG	163	3567.99
	GTGTCAGACCTGTGAAATTCAGTTCTTCAGC	197	4312.23
	GTGTCAGACCTGTGAAATTCAGTTCTTCAGCT	1	21.8895
	GTGTCAGACCTGTGAAATTCAGTTCTTCAGCT	21	459.68
	GTGTCAGACCTGTGAAATTCAGTTCTTCAGCTG	8	175.116
	GTGTCAGACCTGTGAAATTCAGTTCTTCAGCTG	112	2451.62
	GTGTCAGACCTGTGAAATTCAGTTCTTCAGCTGG	119	2604.85
	GTGTCAGACCTGTGAAATTCAGTTCTTCAGCTGGG	320	7004.64
	GTGTCAGACCTGTGAAATTCAGTTCTTCAGCTGGGA	86	1882.5
	GTGTCAGACCTGTGAAATTCAGTTCTTCAGCTGGGAT	10	218.895
	GTGTCAGACCTGTGAAATTCAGTTCTTCAGCTGGGATA	3	65.6685
	GTGTCAGACCTGTGAAATTCAGTTCTTCAGCTGGGATATCT	1	21.8895
	GTGTCAGACCTGTGAAATTCAGTTCTTCAGCTGGGATATCTC	1	21.8895
	TGTCAGACCTGTGAAATTCAGTTCTTCAGCTGGGATATCTCTGTCATCG	3	65.6685
	TGTCAGACCTGTGAAATTCAGTTCTT	1	21.8895
	TGTCAGACCTGTGAAATTCAGTTCTT	51	1116.36
	TGTCAGACCTGTGAAATTCAGTTCTTC	1	21.8895
	TGTCAGACCTGTGAAATTCAGTTCTTCA	3	65.6685
	TGTCAGACCTGTGAAATTCAGTTCTTCA	1	21.8895
	TGTCAGACCTGTGAAATTCAGTTCTTCAG	3	65.6685
	TGTCAGACCTGTGAAATTCAGTTCTTCAG	4	87.558
	TGTCAGACCTGTGAAATTCAGTTCTTCAGC	2	43.779
	TGTCAGACCTGTGAAATTCAGTTCTTCAGC	15	328.343
	TGTCAGACCTGTGAAATTCAGTTCTTCAGCT	6	131.337
	TGTCAGACCTGTGAAATTCAGTTCTTCAGCT	1	21.8895
	TGTCAGACCTGTGAAATTCAGTTCTTCAGCTG	38	831.801
	TGTCAGACCTGTGAAATTCAGTTCTTCAGCTG	7	153.227
	TGTCAGACCTGTGAAATTCAGTTCTTCAGCTGG	20	437.79
	TGTCAGACCTGTGAAATTCAGTTCTTCAGCTGGG	1	21.8895
	TGTCAGACCTGTGAAATTCAGTTCTTCAGCTGGG	69	1510.38
	TGTCAGACCTGTGAAATTCAGTTCTTCAGCTGGGA	17	372.122
	TGTCAGACCTGTGAAATTCAGTTCTTCAGCTGGGAT	1	21.8895
	TGTCAGACCTGTGAAATTCAGTTCTTCAGCTGGGATA	2	43.779
	TGTCAGACCTGTGAAATTCAGTTCTTCAGCTGGGATA	4	87.558
	TGTCAGACCTGTGAAATTCAGTTCTTCAGCTGGGATATC	1	21.8895
	GTCAGACCTGTGAAATTCAGTTCTTCAGCTGGGATATCTCTGTC	2	43.779
	GTCAGACCTGTGAAATTCAGTTCTTCAGCTGGGATATCTCTGTCA	1	21.8895
	GTCAGACCTGTGAAATTCAGTTCTTCAGCTGGGATATCTCTGTCATC	2	43.779
	GTCAGACCTGTGAAATTCAGTTCTTCAGCTGGGATATCTCTGTCATCG	1	21.8895
	GTCAGACCTGTGAAATTCAGTTCTT	107	2342.18
	GTCAGACCTGTGAAATTCAGTTCTTC	1	21.8895
	GTCAGACCTGTGAAATTCAGTTCTTCA	2	43.779
	GTCAGACCTGTGAAATTCAGTTCTTCA	1	21.8895
	GTCAGACCTGTGAAATTCAGTTCTTCAG	4	87.558
	GTCAGACCTGTGAAATTCAGTTCTTCAGC	13	284.564
	GTCAGACCTGTGAAATTCAGTTCTTCAGCT	2	43.779
	GTCAGACCTGTGAAATTCAGTTCTTCAGCT	4	87.558
	GTCAGACCTGTGAAATTCAGTTCTTCAGCTG	6	131.337
	GTCAGACCTGTGAAATTCAGTTCTTCAGCTG	37	809.912
	GTCAGACCTGTGAAATTCAGTTCTTCAGCTGG	1	21.8895
	GTCAGACCTGTGAAATTCAGTTCTTCAGCTGG	36	788.022
	GTCAGACCTGTGAAATTCAGTTCTTCAGCTGGG	95	2079.5
	GTCAGACCTGTGAAATTCAGTTCTTCAGCTGGGA	50	1094.48
	GTCAGACCTGTGAAATTCAGTTCTTCAGCTGGGAT	1	21.8895
	GTCAGACCTGTGAAATTCAGTTCTTCAGCTGGGAT	21	459.68
	GTCAGACCTGTGAAATTCAGTTCTTCAGCTGGGATA	1	21.8895
	GTCAGACCTGTGAAATTCAGTTCTTCAGCTGGGATA	23	503.459
	GTCAGACCTGTGAAATTCAGTTCTTCAGCTGGGATAT	4	87.558
	GTCAGACCTGTGAAATTCAGTTCTTCAGCTGGGATATC	1	21.8895
	GTCAGACCTGTGAAATTCAGTTCTTCAGCTGGGATATC	7	153.227
	GTCAGACCTGTGAAATTCAGTTCTTCAGCTGGGATATCT	3	65.6685
	GTCAGACCTGTGAAATTCAGTTCTTCAGCTGGGATATCTC	1	21.8895
	TCAGACCTGTGAAATTCAGTTCTTCAGCTGGGATATCTCTGTCA	1	21.8895
	TCAGACCTGTGAAATTCAGTTCTTCAGCTGGGATATCTCTGTCATCG	1	21.8895
	TCAGACCTGTGAAATTCAGTTCTTCA	1	21.8895
	TCAGACCTGTGAAATTCAGTTCTTCAG	1	21.8895
	TCAGACCTGTGAAATTCAGTTCTTCAG	1	21.8895
	TCAGACCTGTGAAATTCAGTTCTTCAGC	3	65.6685
	TCAGACCTGTGAAATTCAGTTCTTCAGC	3	65.6685
	TCAGACCTGTGAAATTCAGTTCTTCAGCT	13	284.564
	TCAGACCTGTGAAATTCAGTTCTTCAGCT	1	21.8895
	TCAGACCTGTGAAATTCAGTTCTTCAGCTG	63	1379.04
	TCAGACCTGTGAAATTCAGTTCTTCAGCTG	6	131.337
	TCAGACCTGTGAAATTCAGTTCTTCAGCTGG	9	197.006
	TCAGACCTGTGAAATTCAGTTCTTCAGCTGGG	81	1773.05
	TCAGACCTGTGAAATTCAGTTCTTCAGCTGGGA	1	21.8895
	TCAGACCTGTGAAATTCAGTTCTTCAGCTGGGA	11	240.785
	TCAGACCTGTGAAATTCAGTTCTTCAGCTGGGAT	1	21.8895
	TCAGACCTGTGAAATTCAGTTCTTCAGCTGGGATA	2	43.779
	TCAGACCTGTGAAATTCAGTTCTTCAGCTGGGATAT	3	65.6685
	TCAGACCTGTGAAATTCAGTTCTTCAGCTGGGATATC	2	43.779
	TCAGACCTGTGAAATTCAGTTCTTCAGCTGGGATATCT	8	175.116
	CAGACCTGTGAAATTCAGTTCTTCAGCTGGGATATCTCTGTCATC	2	43.779
	CAGACCTGTGAAATTCAGTTCTTCAGCTGGGATATCTCTGTCATCG	1	21.8895
	CAGACCTGTGAAATTCAGTTCTTCAG	3	65.6685
	CAGACCTGTGAAATTCAGTTCTTCAGC	1	21.8895
	CAGACCTGTGAAATTCAGTTCTTCAGCT	2	43.779
	CAGACCTGTGAAATTCAGTTCTTCAGCTG	11	240.785
	CAGACCTGTGAAATTCAGTTCTTCAGCTG	6	131.337
	CAGACCTGTGAAATTCAGTTCTTCAGCTGG	14	306.453
	CAGACCTGTGAAATTCAGTTCTTCAGCTGGG	2	43.779
	CAGACCTGTGAAATTCAGTTCTTCAGCTGGG	88	1926.28
	CAGACCTGTGAAATTCAGTTCTTCAGCTGGGA	39	853.691
	CAGACCTGTGAAATTCAGTTCTTCAGCTGGGAT	12	262.674
	CAGACCTGTGAAATTCAGTTCTTCAGCTGGGATA	3	65.6685
	CAGACCTGTGAAATTCAGTTCTTCAGCTGGGATA	14	306.453
	CAGACCTGTGAAATTCAGTTCTTCAGCTGGGATAT	1	21.8895
	CAGACCTGTGAAATTCAGTTCTTCAGCTGGGATATC	16	350.232
	CAGACCTGTGAAATTCAGTTCTTCAGCTGGGATATCT	18	394.011
	CAGACCTGTGAAATTCAGTTCTTCAGCTGGGATATCTC	4	87.558
	CAGACCTGTGAAATTCAGTTCTTCAGCTGGGATATCTCT	1	21.8895
	AGACCTGTGAAATTCAGTTCTTCAGCTGGGATATCTCTGTC	2	43.779
	AGACCTGTGAAATTCAGTTCTTCAGCTGGGATATCTCTGTCA	5	109.448
	AGACCTGTGAAATTCAGTTCTTCAGCTGGGATATCTCTGTCATC	8	175.116
	AGACCTGTGAAATTCAGTTCTTCAGCTGGGATATCTCTGTCATCG	7	153.227
	AGACCTGTGAAATTCAGTTCTTCAG	4	87.558
	AGACCTGTGAAATTCAGTTCTTCAGC	1	21.8895
	AGACCTGTGAAATTCAGTTCTTCAGCTG	5	109.448
	AGACCTGTGAAATTCAGTTCTTCAGCTG	5	109.448
	AGACCTGTGAAATTCAGTTCTTCAGCTGG	30	656.685
	AGACCTGTGAAATTCAGTTCTTCAGCTGGG	1	21.8895
	AGACCTGTGAAATTCAGTTCTTCAGCTGGG	214	4684.35
	AGACCTGTGAAATTCAGTTCTTCAGCTGGGA	1	21.8895
	AGACCTGTGAAATTCAGTTCTTCAGCTGGGA	87	1904.39
	AGACCTGTGAAATTCAGTTCTTCAGCTGGGAT	2	43.779
	AGACCTGTGAAATTCAGTTCTTCAGCTGGGAT	44	963.138
	AGACCTGTGAAATTCAGTTCTTCAGCTGGGATA	1	21.8895
	AGACCTGTGAAATTCAGTTCTTCAGCTGGGATA	39	853.691
	AGACCTGTGAAATTCAGTTCTTCAGCTGGGATAT	2	43.779
	AGACCTGTGAAATTCAGTTCTTCAGCTGGGATAT	13	284.564
	AGACCTGTGAAATTCAGTTCTTCAGCTGGGATATC	1	21.8895
	AGACCTGTGAAATTCAGTTCTTCAGCTGGGATATC	39	853.691
	AGACCTGTGAAATTCAGTTCTTCAGCTGGGATATCT	76	1663.6
	AGACCTGTGAAATTCAGTTCTTCAGCTGGGATATCTC	31	678.575
	AGACCTGTGAAATTCAGTTCTTCAGCTGGGATATCTCT	19	415.901
	AGACCTGTGAAATTCAGTTCTTCAGCTGGGATATCTCTG	4	87.558
	GACCTGTGAAATTCAGTTCTTCAGCTGGGATATCTCTGTC	6	131.337
	GACCTGTGAAATTCAGTTCTTCAGCTGGGATATCTCTGTCA	3	65.6685
	GACCTGTGAAATTCAGTTCTTCAGCTGGGATATCTCTGTCATC	7	153.227
	GACCTGTGAAATTCAGTTCTTCAGCTGGGATATCTCTGTCATCG	15	328.343
	GACCTGTGAAATTCAGTTCTTCAGC	4	87.558
	GACCTGTGAAATTCAGTTCTTCAGCT	1	21.8895
	GACCTGTGAAATTCAGTTCTTCAGCT	1	21.8895
	GACCTGTGAAATTCAGTTCTTCAGCTG	4	87.558
	GACCTGTGAAATTCAGTTCTTCAGCTG	3	65.6685
	GACCTGTGAAATTCAGTTCTTCAGCTGG	34	744.243
	GACCTGTGAAATTCAGTTCTTCAGCTGGG	188	4115.23
	GACCTGTGAAATTCAGTTCTTCAGCTGGGA	90	1970.06
	GACCTGTGAAATTCAGTTCTTCAGCTGGGAT	53	1160.14
	GACCTGTGAAATTCAGTTCTTCAGCTGGGATA	3	65.6685
	GACCTGTGAAATTCAGTTCTTCAGCTGGGATA	47	1028.81
	GACCTGTGAAATTCAGTTCTTCAGCTGGGATAT	3	65.6685
	GACCTGTGAAATTCAGTTCTTCAGCTGGGATAT	18	394.011
	GACCTGTGAAATTCAGTTCTTCAGCTGGGATATC	1	21.8895
	GACCTGTGAAATTCAGTTCTTCAGCTGGGATATC	51	1116.36
	GACCTGTGAAATTCAGTTCTTCAGCTGGGATATCT	110	2407.85
	GACCTGTGAAATTCAGTTCTTCAGCTGGGATATCTC	35	766.133
	GACCTGTGAAATTCAGTTCTTCAGCTGGGATATCTCT	16	350.232
	GACCTGTGAAATTCAGTTCTTCAGCTGGGATATCTCTG	2	43.779
	GACCTGTGAAATTCAGTTCTTCAGCTGGGATATCTCTGT	3	65.6685
	ACCTGTGAAATTCAGTTCTTCAGCTGGGATATCTCTGTCATC	1	21.8895
	ACCTGTGAAATTCAGTTCTTCAGCT	8	175.116
	ACCTGTGAAATTCAGTTCTTCAGCTG	3	65.6685
	ACCTGTGAAATTCAGTTCTTCAGCTGG	1	21.8895
	ACCTGTGAAATTCAGTTCTTCAGCTGG	1	21.8895
	ACCTGTGAAATTCAGTTCTTCAGCTGGG	12	262.674
	ACCTGTGAAATTCAGTTCTTCAGCTGGG	3	65.6685
	ACCTGTGAAATTCAGTTCTTCAGCTGGGA	19	415.901
	ACCTGTGAAATTCAGTTCTTCAGCTGGGAT	20	437.79
	ACCTGTGAAATTCAGTTCTTCAGCTGGGATA	41	897.47
	ACCTGTGAAATTCAGTTCTTCAGCTGGGATA	2	43.779
	ACCTGTGAAATTCAGTTCTTCAGCTGGGATAT	69	1510.38
	ACCTGTGAAATTCAGTTCTTCAGCTGGGATATC	19	415.901
	ACCTGTGAAATTCAGTTCTTCAGCTGGGATATCT	2	43.779
	ACCTGTGAAATTCAGTTCTTCAGCTGGGATATCT	9	197.006
	ACCTGTGAAATTCAGTTCTTCAGCTGGGATATCTC	10	218.895
	ACCTGTGAAATTCAGTTCTTCAGCTGGGATATCTC	1	21.8895
	ACCTGTGAAATTCAGTTCTTCAGCTGGGATATCTCT	1	21.8895
	ACCTGTGAAATTCAGTTCTTCAGCTGGGATATCTCT	2	43.779
	ACCTGTGAAATTCAGTTCTTCAGCTGGGATATCTCTG	5	109.448
	ACCTGTGAAATTCAGTTCTTCAGCTGGGATATCTCTGT	1	21.8895
	CCTGTGAAATTCAGTTCTTCAGCTGGGATATCTCTGTC	2	43.779
	CCTGTGAAATTCAGTTCTTCAGCTGGGATATCTCTGTC	4	87.558
	CCTGTGAAATTCAGTTCTTCAGCTG	4	87.558
	CCTGTGAAATTCAGTTCTTCAGCTGGG	5	109.448
	CCTGTGAAATTCAGTTCTTCAGCTGGG	3	65.6685
	CCTGTGAAATTCAGTTCTTCAGCTGGGA	11	240.785
	CCTGTGAAATTCAGTTCTTCAGCTGGGA	2	43.779
	CCTGTGAAATTCAGTTCTTCAGCTGGGAT	25	547.238
	CCTGTGAAATTCAGTTCTTCAGCTGGGAT	2	43.779
	CCTGTGAAATTCAGTTCTTCAGCTGGGATA	37	809.912
	CCTGTGAAATTCAGTTCTTCAGCTGGGATA	1	21.8895
	CCTGTGAAATTCAGTTCTTCAGCTGGGATAT	64	1400.93
	CCTGTGAAATTCAGTTCTTCAGCTGGGATATC	13	284.564
	CCTGTGAAATTCAGTTCTTCAGCTGGGATATC	3	65.6685
	CCTGTGAAATTCAGTTCTTCAGCTGGGATATCT	1	21.8895
	CCTGTGAAATTCAGTTCTTCAGCTGGGATATCT	7	153.227
	CCTGTGAAATTCAGTTCTTCAGCTGGGATATCTC	9	197.006
	CCTGTGAAATTCAGTTCTTCAGCTGGGATATCTC	1	21.8895
	CCTGTGAAATTCAGTTCTTCAGCTGGGATATCTCT	2	43.779
	CCTGTGAAATTCAGTTCTTCAGCTGGGATATCTCT	2	43.779
	CCTGTGAAATTCAGTTCTTCAGCTGGGATATCTCTG	2	43.779
	CCTGTGAAATTCAGTTCTTCAGCTGGGATATCTCTG	2	43.779
	CTGTGAAATTCAGTTCTTCAGCTGGGATATCTCTGTC	1	21.8895
	CTGTGAAATTCAGTTCTTCAGCTGGGATATCTCTGTC	16	350.232
	CTGTGAAATTCAGTTCTTCAGCTGGGATATCTCTGTCA	9	197.006
	CTGTGAAATTCAGTTCTTCAGCTGGGATATCTCTGTCATC	5	109.448
	CTGTGAAATTCAGTTCTTCAGCTGGGATATCTCTGTCATCG	1	21.8895
	CCGATGTGTATCCTCAGCTTTGAGA	3	65.6685
	CCGATGTGTATCCTCAGCTTTGAGAA	1	21.8895
	CCGATGTGTATCCTCAGCTTTGAGAA	2	43.779
	CCGATGTGTATCCTCAGCTTTGAGAAC	18	394.011
	CCGATGTGTATCCTCAGCTTTGAGAAC	1	21.8895
	CCGATGTGTATCCTCAGCTTTGAGAACT	23	503.459
	CCGATGTGTATCCTCAGCTTTGAGAACT	7	153.227
	CCGATGTGTATCCTCAGCTTTGAGAACTG	9	197.006
	CCGATGTGTATCCTCAGCTTTGAGAACTG	5	109.448
	CCGATGTGTATCCTCAGCTTTGAGAACTGA	20	437.79
	CCGATGTGTATCCTCAGCTTTGAGAACTGA	8	175.116
	CCGATGTGTATCCTCAGCTTTGAGAACTGAA	151	3305.31
	CCGATGTGTATCCTCAGCTTTGAGAACTGAA	6	131.337
	CTGTGAAATTCAGTTCTTCAGCTGGG	4	87.558
	CTGTGAAATTCAGTTCTTCAGCTGGG	1	21.8895
	CCGATGTGTATCCTCAGCTTTGAGAACTGAAT	23	503.459
	CCGATGTGTATCCTCAGCTTTGAGAACTGAAT	70	1532.27
	CTGTGAAATTCAGTTCTTCAGCTGGGA	4	87.558
	CTGTGAAATTCAGTTCTTCAGCTGGGA	2	43.779
	CTGTGAAATTCAGTTCTTCAGCTGGGAT	5	109.448
	CTGTGAAATTCAGTTCTTCAGCTGGGAT	2	43.779
	CTGTGAAATTCAGTTCTTCAGCTGGGATA	9	197.006
	CTGTGAAATTCAGTTCTTCAGCTGGGATA	1	21.8895
	CTGTGAAATTCAGTTCTTCAGCTGGGATAT	26	569.127
	CTGTGAAATTCAGTTCTTCAGCTGGGATAT	2	43.779
	CTGTGAAATTCAGTTCTTCAGCTGGGATATC	5	109.448
	CTGTGAAATTCAGTTCTTCAGCTGGGATATC	7	153.227
	CTGTGAAATTCAGTTCTTCAGCTGGGATATCT	1	21.8895
	CTGTGAAATTCAGTTCTTCAGCTGGGATATCT	28	612.906
	CTGTGAAATTCAGTTCTTCAGCTGGGATATCTC	2	43.779
	CTGTGAAATTCAGTTCTTCAGCTGGGATATCTC	4	87.558
	CTGTGAAATTCAGTTCTTCAGCTGGGATATCTCT	1	21.8895
	CTGTGAAATTCAGTTCTTCAGCTGGGATATCTCT	4	87.558
	CTGTGAAATTCAGTTCTTCAGCTGGGATATCTCTG	1	21.8895
	CTGTGAAATTCAGTTCTTCAGCTGGGATATCTCTG	14	306.453
	CTGTGAAATTCAGTTCTTCAGCTGGGATATCTCTGT	9	197.006
	CCGATGTGTATCCTCAGCTTTGAGAACTGAATT	181	3962
	CCGATGTGTATCCTCAGCTTTGAGAACTGAATT	17	372.122
	CCGATGTGTATCCTCAGCTTTGAGAACTGAATTC	108	2364.07
	CCGATGTGTATCCTCAGCTTTGAGAACTGAATTC	2	43.779
	TGTGAAATTCAGTTCTTCAGCTGGGATATCTCTGTC	3	65.6685
	TGTGAAATTCAGTTCTTCAGCTGGGATATCTCTGTC	57	1247.7
	TGTGAAATTCAGTTCTTCAGCTGGGATATCTCTGTCA	59	1291.48
	TGTGAAATTCAGTTCTTCAGCTGGGATATCTCTGTCAT	11	240.785
	TGTGAAATTCAGTTCTTCAGCTGGGATATCTCTGTCATC	48	1050.7
	TGTGAAATTCAGTTCTTCAGCTGGGATATCTCTGTCATCG	10	218.895
	CCGATGTGTATCCTCAGCTTTGAGAACTGAATTCC	8	175.116
	CCGATGTGTATCCTCAGCTTTGAGAACTGAATTCC	14	306.453
	CCGATGTGTATCCTCAGCTTTGAGAACTGAATTCCA	22	481.569
	CCGATGTGTATCCTCAGCTTTGAGAACTGAATTCCA	6	131.337
	CCGATGTGTATCCTCAGCTTTGAGAACTGAATTCCAT	5	109.448
	CCGATGTGTATCCTCAGCTTTGAGAACTGAATTCCATG	3	65.6685
	CCGATGTGTATCCTCAGCTTTGAGAACTGAATTCCATG	2	43.779
	TGTGAAATTCAGTTCTTCAGCTGGGA	2	43.779
	TGTGAAATTCAGTTCTTCAGCTGGGA	1	21.8895
	TGTGAAATTCAGTTCTTCAGCTGGGAT	4	87.558
	TGTGAAATTCAGTTCTTCAGCTGGGAT	1	21.8895
	TGTGAAATTCAGTTCTTCAGCTGGGATA	9	197.006
	TGTGAAATTCAGTTCTTCAGCTGGGATAT	15	328.343
	TGTGAAATTCAGTTCTTCAGCTGGGATAT	1	21.8895
	TGTGAAATTCAGTTCTTCAGCTGGGATATC	5	109.448
	TGTGAAATTCAGTTCTTCAGCTGGGATATC	4	87.558
	TGTGAAATTCAGTTCTTCAGCTGGGATATCT	2	43.779
	TGTGAAATTCAGTTCTTCAGCTGGGATATCT	35	766.133
	TGTGAAATTCAGTTCTTCAGCTGGGATATCTC	9	197.006
	TGTGAAATTCAGTTCTTCAGCTGGGATATCTC	10	218.895
	TGTGAAATTCAGTTCTTCAGCTGGGATATCTCT	5	109.448
	TGTGAAATTCAGTTCTTCAGCTGGGATATCTCT	5	109.448
	TGTGAAATTCAGTTCTTCAGCTGGGATATCTCTG	2	43.779
	TGTGAAATTCAGTTCTTCAGCTGGGATATCTCTG	18	394.011
	TGTGAAATTCAGTTCTTCAGCTGGGATATCTCTGT	12	262.674
	GTGAAATTCAGTTCTTCAGCTGGGATATCTCTGTC	1	21.8895
	GTGAAATTCAGTTCTTCAGCTGGGATATCTCTGTC	7	153.227
	GTGAAATTCAGTTCTTCAGCTGGGATATCTCTGTCA	17	372.122
	GTGAAATTCAGTTCTTCAGCTGGGATATCTCTGTCAT	1	21.8895
	GTGAAATTCAGTTCTTCAGCTGGGATATCTCTGTCATC	7	153.227
	GTGAAATTCAGTTCTTCAGCTGGGATATCTCTGTCATCG	1	21.8895
	GTGAAATTCAGTTCTTCAGCTGGGA	2	43.779
	GTGAAATTCAGTTCTTCAGCTGGGA	2	43.779
	GTGAAATTCAGTTCTTCAGCTGGGAT	1	21.8895
	GTGAAATTCAGTTCTTCAGCTGGGATA	14	306.453
	GTGAAATTCAGTTCTTCAGCTGGGATAT	7	153.227
	GTGAAATTCAGTTCTTCAGCTGGGATATC	8	175.116
	GTGAAATTCAGTTCTTCAGCTGGGATATCT	2	43.779
	GTGAAATTCAGTTCTTCAGCTGGGATATCT	5	109.448
	GTGAAATTCAGTTCTTCAGCTGGGATATCTC	8	175.116
	GTGAAATTCAGTTCTTCAGCTGGGATATCTCT	6	131.337
	GTGAAATTCAGTTCTTCAGCTGGGATATCTCTG	4	87.558
	GTGAAATTCAGTTCTTCAGCTGGGATATCTCTG	4	87.558
	GTGAAATTCAGTTCTTCAGCTGGGATATCTCTGT	4	87.558
	GTGAAATTCAGTTCTTCAGCTGGGATATCTCTGT	3	65.6685
	TGAAATTCAGTTCTTCAGCTGGGATATCTCTGTC	3	65.6685
	TGAAATTCAGTTCTTCAGCTGGGATATCTCTGTC	23	503.459
	TGAAATTCAGTTCTTCAGCTGGGATATCTCTGTCA	36	788.022
	TGAAATTCAGTTCTTCAGCTGGGATATCTCTGTCAT	12	262.674
	TGAAATTCAGTTCTTCAGCTGGGATATCTCTGTCATC	83	1816.83
	TGAAATTCAGTTCTTCAGCTGGGATATCTCTGTCATCG	157	3436.65
	TGAAATTCAGTTCTTCAGCTGGGAT	1	21.8895
	TGAAATTCAGTTCTTCAGCTGGGATA	4	87.558
	TGAAATTCAGTTCTTCAGCTGGGATAT	2	43.779
	TGAAATTCAGTTCTTCAGCTGGGATATCT	3	65.6685
	TGAAATTCAGTTCTTCAGCTGGGATATCTC	1	21.8895
	TGAAATTCAGTTCTTCAGCTGGGATATCTCT	4	87.558
	TGAAATTCAGTTCTTCAGCTGGGATATCTCTG	11	240.785
	TGAAATTCAGTTCTTCAGCTGGGATATCTCTGT	2	43.779
	TGAAATTCAGTTCTTCAGCTGGGATATCTCTGT	6	131.337
	GAAATTCAGTTCTTCAGCTGGGATATCTCTGTC	9	197.006
	GAAATTCAGTTCTTCAGCTGGGATATCTCTGTCA	1	21.8895
	GAAATTCAGTTCTTCAGCTGGGATATCTCTGTCA	13	284.564
	GAAATTCAGTTCTTCAGCTGGGATATCTCTGTCAT	6	131.337
	GAAATTCAGTTCTTCAGCTGGGATATCTCTGTCATC	58	1269.59
	GAAATTCAGTTCTTCAGCTGGGATATCTCTGTCATCG	78	1707.38
	GAAATTCAGTTCTTCAGCTGGGATA	4	87.558
	GAAATTCAGTTCTTCAGCTGGGATAT	1	21.8895
	GAAATTCAGTTCTTCAGCTGGGATATC	1	21.8895
	GAAATTCAGTTCTTCAGCTGGGATATC	1	21.8895
	GAAATTCAGTTCTTCAGCTGGGATATCT	1	21.8895
	GAAATTCAGTTCTTCAGCTGGGATATCT	1	21.8895
	GAAATTCAGTTCTTCAGCTGGGATATCTC	1	21.8895
	GAAATTCAGTTCTTCAGCTGGGATATCTCT	1	21.8895
	GAAATTCAGTTCTTCAGCTGGGATATCTCTG	2	43.779
	GAAATTCAGTTCTTCAGCTGGGATATCTCTG	5	109.448
	GAAATTCAGTTCTTCAGCTGGGATATCTCTGT	1	21.8895
	GAAATTCAGTTCTTCAGCTGGGATATCTCTGT	5	109.448
	AAATTCAGTTCTTCAGCTGGGATATCTCTGTC	1	21.8895
	AAATTCAGTTCTTCAGCTGGGATATCTCTGTC	59	1291.48
	AAATTCAGTTCTTCAGCTGGGATATCTCTGTCA	112	2451.62
	AAATTCAGTTCTTCAGCTGGGATATCTCTGTCAT	51	1116.36
	AAATTCAGTTCTTCAGCTGGGATATCTCTGTCATC	361	7902.11
	AAATTCAGTTCTTCAGCTGGGATATCTCTGTCATCG	553	12104.9
	AAATTCAGTTCTTCAGCTGGGATATC	1	21.8895
	AAATTCAGTTCTTCAGCTGGGATATCT	1	21.8895
	AAATTCAGTTCTTCAGCTGGGATATCTC	2	43.779
	AAATTCAGTTCTTCAGCTGGGATATCTCT	2	43.779
	AAATTCAGTTCTTCAGCTGGGATATCTCTG	1	21.8895
	AAATTCAGTTCTTCAGCTGGGATATCTCTG	14	306.453
	AAATTCAGTTCTTCAGCTGGGATATCTCTGT	33	722.354
	AATTCAGTTCTTCAGCTGGGATATCTCTGTC	6	131.337
	AATTCAGTTCTTCAGCTGGGATATCTCTGTC	33	722.354
	AATTCAGTTCTTCAGCTGGGATATCTCTGTCA	80	1751.16
	AATTCAGTTCTTCAGCTGGGATATCTCTGTCAT	29	634.796
	AATTCAGTTCTTCAGCTGGGATATCTCTGTCATC	274	5997.72
	AATTCAGTTCTTCAGCTGGGATATCTCTGTCATCG	428	9368.71
	AATTCAGTTCTTCAGCTGGGATATCTC	1	21.8895
	AATTCAGTTCTTCAGCTGGGATATCTCT	2	43.779
	AATTCAGTTCTTCAGCTGGGATATCTCTG	5	109.448
	AATTCAGTTCTTCAGCTGGGATATCTCTGT	1	21.8895
	AATTCAGTTCTTCAGCTGGGATATCTCTGT	16	350.232
	ATTCAGTTCTTCAGCTGGGATATCTCTGTC	1	21.8895
	ATTCAGTTCTTCAGCTGGGATATCTCTGTC	2	43.779
	ATTCAGTTCTTCAGCTGGGATATCTCTGTCA	11	240.785
	ATTCAGTTCTTCAGCTGGGATATCTCTGTCAT	1	21.8895
	ATTCAGTTCTTCAGCTGGGATATCTCTGTCATC	16	350.232
	ATTCAGTTCTTCAGCTGGGATATCTCTGTCATCG	29	634.796
	ATTCAGTTCTTCAGCTGGGATATCTCTGT	1	21.8895
	TTCAGTTCTTCAGCTGGGATATCTCTGTC	5	109.448
	TTCAGTTCTTCAGCTGGGATATCTCTGTCA	79	1729.27
	TTCAGTTCTTCAGCTGGGATATCTCTGTCAT	69	1510.38
	TTCAGTTCTTCAGCTGGGATATCTCTGTCATC	551	12061.1
	TTCAGTTCTTCAGCTGGGATATCTCTGTCATCG	1342	29375.7
	TTCAGTTCTTCAGCTGGGATATCTCTG	3	65.6685
	TTCAGTTCTTCAGCTGGGATATCTCTGT	1	21.8895
	TTCAGTTCTTCAGCTGGGATATCTCTGT	2	43.779
	TCAGTTCTTCAGCTGGGATATCTCTGTC	6	131.337
	TCAGTTCTTCAGCTGGGATATCTCTGTC	2	43.779
	TCAGTTCTTCAGCTGGGATATCTCTGTCA	2	43.779
	TCAGTTCTTCAGCTGGGATATCTCTGTCA	28	612.906
	TCAGTTCTTCAGCTGGGATATCTCTGTCAT	2	43.779
	TCAGTTCTTCAGCTGGGATATCTCTGTCAT	68	1488.49
	TCAGTTCTTCAGCTGGGATATCTCTGTCATC	2	43.779
	TCAGTTCTTCAGCTGGGATATCTCTGTCATC	627	13724.7
	TCAGTTCTTCAGCTGGGATATCTCTGTCATCG	4	87.558
	TCAGTTCTTCAGCTGGGATATCTCTGTCATCG	2700	59101.7
	TCAGTTCTTCAGCTGGGATATCTCT	2	43.779
	TCAGTTCTTCAGCTGGGATATCTCTG	5	109.448
	TCAGTTCTTCAGCTGGGATATCTCTGT	3	65.6685
	TCAGTTCTTCAGCTGGGATATCTCTGT	2	43.779
	CAGTTCTTCAGCTGGGATATCTCTGTC	10	218.895
	CAGTTCTTCAGCTGGGATATCTCTGTC	2	43.779
	CAGTTCTTCAGCTGGGATATCTCTGTCA	5	109.448
	CAGTTCTTCAGCTGGGATATCTCTGTCAT	11	240.785
	CAGTTCTTCAGCTGGGATATCTCTGTCATC	3	65.6685
	CAGTTCTTCAGCTGGGATATCTCTGTCATC	88	1926.28
	CAGTTCTTCAGCTGGGATATCTCTGTCATCG	5	109.448
	CAGTTCTTCAGCTGGGATATCTCTGTCATCG	289	6326.07
	CGATGTGTATCCTCAGCTTTGAGAA	3	65.6685
	CGATGTGTATCCTCAGCTTTGAGAA	3	65.6685
	CGATGTGTATCCTCAGCTTTGAGAAC	20	437.79
	CGATGTGTATCCTCAGCTTTGAGAAC	2	43.779
	CGATGTGTATCCTCAGCTTTGAGAACT	33	722.354
	CGATGTGTATCCTCAGCTTTGAGAACT	4	87.558
	CGATGTGTATCCTCAGCTTTGAGAACTG	41	897.47
	CGATGTGTATCCTCAGCTTTGAGAACTG	9	197.006
	CGATGTGTATCCTCAGCTTTGAGAACTGA	55	1203.92
	CGATGTGTATCCTCAGCTTTGAGAACTGA	21	459.68
	CGATGTGTATCCTCAGCTTTGAGAACTGAA	423	9259.26
	CGATGTGTATCCTCAGCTTTGAGAACTGAA	31	678.575
	CGATGTGTATCCTCAGCTTTGAGAACTGAAT	91	1991.94
	CGATGTGTATCCTCAGCTTTGAGAACTGAAT	587	12849.1
	CAGTTCTTCAGCTGGGATATCTCTG	5	109.448
	CAGTTCTTCAGCTGGGATATCTCTGT	1	21.8895
	CAGTTCTTCAGCTGGGATATCTCTGT	1	21.8895
	CGATGTGTATCCTCAGCTTTGAGAACTGAATT	668	14622.2
	CGATGTGTATCCTCAGCTTTGAGAACTGAATT	219	4793.8
	CGATGTGTATCCTCAGCTTTGAGAACTGAATTC	345	7551.88
	CGATGTGTATCCTCAGCTTTGAGAACTGAATTC	16	350.232
	AGTTCTTCAGCTGGGATATCTCTGTC	29	634.796
	AGTTCTTCAGCTGGGATATCTCTGTC	2	43.779
	AGTTCTTCAGCTGGGATATCTCTGTCA	8	175.116
	AGTTCTTCAGCTGGGATATCTCTGTCA	7	153.227
	AGTTCTTCAGCTGGGATATCTCTGTCAT	3	65.6685
	AGTTCTTCAGCTGGGATATCTCTGTCAT	9	197.006
	AGTTCTTCAGCTGGGATATCTCTGTCATC	11	240.785
	AGTTCTTCAGCTGGGATATCTCTGTCATC	79	1729.27
	AGTTCTTCAGCTGGGATATCTCTGTCATCG	23	503.459
	AGTTCTTCAGCTGGGATATCTCTGTCATCG	415	9084.14
	CGATGTGTATCCTCAGCTTTGAGAACTGAATTCC	39	853.691
	CGATGTGTATCCTCAGCTTTGAGAACTGAATTCC	138	3020.75
	CGATGTGTATCCTCAGCTTTGAGAACTGAATTCCA	118	2582.96
	CGATGTGTATCCTCAGCTTTGAGAACTGAATTCCA	152	3327.2
	CGATGTGTATCCTCAGCTTTGAGAACTGAATTCCAT	7	153.227
	CGATGTGTATCCTCAGCTTTGAGAACTGAATTCCAT	50	1094.48
	CGATGTGTATCCTCAGCTTTGAGAACTGAATTCCATG	62	1357.15
	CGATGTGTATCCTCAGCTTTGAGAACTGAATTCCATG	66	1444.71
	CGATGTGTATCCTCAGCTTTGAGAACTGAATTCCATGG	2	43.779
	CGATGTGTATCCTCAGCTTTGAGAACTGAATTCCATGG	2	43.779
	CGATGTGTATCCTCAGCTTTGAGAACTGAATTCCATGGG	17	372.122
	CGATGTGTATCCTCAGCTTTGAGAACTGAATTCCATGGGT	2	43.779
	AGTTCTTCAGCTGGGATATCTCTGT	8	175.116
	AGTTCTTCAGCTGGGATATCTCTGT	1	21.8895
	CGATGTGTATCCTCAGCTTTGAGAACTGAATTCCATGGGTTG	1	21.8895
	GTTCTTCAGCTGGGATATCTCTGTC	22	481.569
	GTTCTTCAGCTGGGATATCTCTGTC	4	87.558
	GTTCTTCAGCTGGGATATCTCTGTCA	4	87.558
	GTTCTTCAGCTGGGATATCTCTGTCA	16	350.232
	GTTCTTCAGCTGGGATATCTCTGTCAT	1	21.8895
	GTTCTTCAGCTGGGATATCTCTGTCAT	7	153.227
	GTTCTTCAGCTGGGATATCTCTGTCATC	6	131.337
	GTTCTTCAGCTGGGATATCTCTGTCATC	96	2101.39
	GTTCTTCAGCTGGGATATCTCTGTCATCG	19	415.901
	GTTCTTCAGCTGGGATATCTCTGTCATCG	409	8952.81
	CGATGTGTATCCTCAGCTTTGAGAACTGAATTCCATGGGTTGTGTC	3	65.6685
	CGATGTGTATCCTCAGCTTTGAGAACTGAATTCCATGGGTTGTGTCA	1	21.8895
	TTCTTCAGCTGGGATATCTCTGTCA	16	350.232
	TTCTTCAGCTGGGATATCTCTGTCAT	14	306.453
	TTCTTCAGCTGGGATATCTCTGTCATC	63	1379.04
	TTCTTCAGCTGGGATATCTCTGTCATC	6	131.337
	TTCTTCAGCTGGGATATCTCTGTCATCG	120	2626.74
	TTCTTCAGCTGGGATATCTCTGTCATCG	21	459.68
	TCTTCAGCTGGGATATCTCTGTCAT	9	197.006
	TCTTCAGCTGGGATATCTCTGTCATC	40	875.58
[truncated: 2,529 more rows]
